# Supplementary material for: Newly Synthesized Pyrazolinone Chalcones as Anticancer Agents via Inhibiting the PI3K/Akt/ERK1/2 Signaling Pathway
Source: PubMed Central journal article supplement — ACS Omega. 2022 Jun 27;7(29):25265–77. doi: 10.1021/acsomega.2c02181 (PMC9330109; doi:10.1021/acsomega.2c02181), 2022-06-27
Supplement: ao2c02181_si_001.pdf [file ao2c02181_si_001.pdf]

# Supporting Information

## Newly Synthesized Pyrazolinone Chalcones as Anticancer Agents via Inhibiting PI3K/Akt/ERK1/2 Signaling Pathway

Ahmed A. Noser <sup>1</sup>, Ihsan A. Shehadi <sup>2</sup>, Aboubakr H. Abdelmonsef <sup>3,\*</sup> and Maha M. Salem <sup>4</sup>

<sup>1</sup> Organic Chemistry, Chemistry Department, Faculty of Science, Tanta University, Tanta 31527, Egypt.

<sup>2</sup> Department of Chemistry, Pure and Applied Chemistry Research Group, College of Sciences, University of Sharjah, Sharjah, 27272, UAE.

<sup>3</sup> Chemistry Department, Faculty of Science, South Valley University, Qena 83523, Egypt.

<sup>4</sup> Biochemistry Division, Chemistry Department, Faculty of Science, Tanta University, Tanta 31527, Egypt.

\*Correspondence: aboubakr.ahmed@sci.svu.edu.eg

## Table of Contents

|                                                                                                        |              |
|--------------------------------------------------------------------------------------------------------|--------------|
| <b>NMR Charts</b>                                                                                      | <b>S-2</b>   |
| <b>Mass spectra charts</b>                                                                             | <b>S-48</b>  |
| <b>FT-IR charts</b>                                                                                    | <b>S-71</b>  |
| <b>Table s1</b>                                                                                        | <b>S-94</b>  |
| <b>Figure s1</b>                                                                                       | <b>S-100</b> |
| <b><math>\beta</math>-actin, <i>p</i>-Akt, <i>p</i>-ERK1/2 and <i>p</i>-PI3K western blot raw data</b> | <b>S-104</b> |

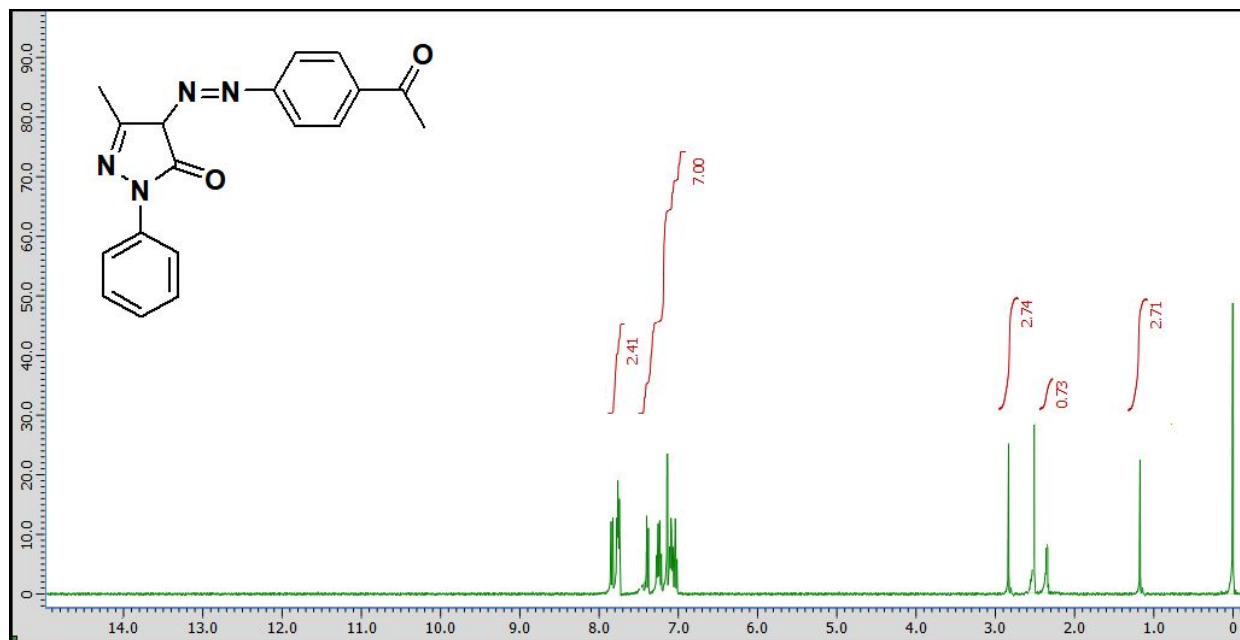

<sup>1</sup>H-NMR of compound 2b

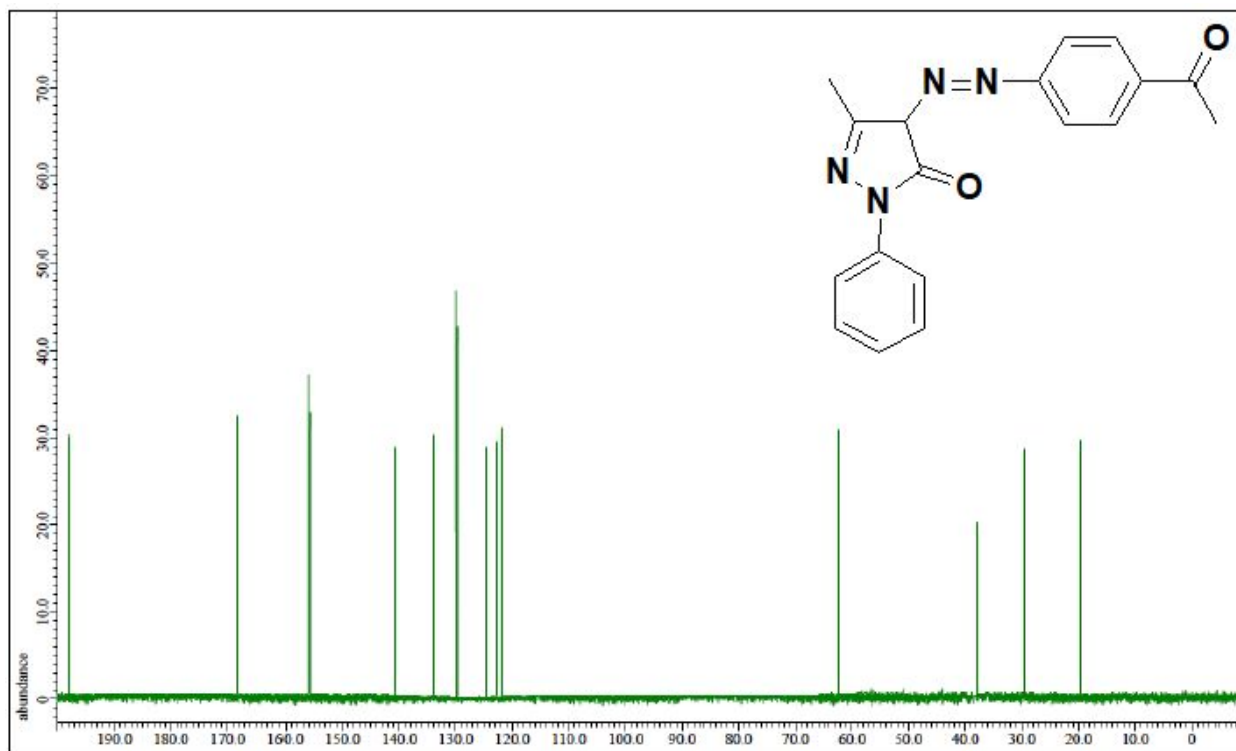

<sup>13</sup>C-NMR of compound 2b

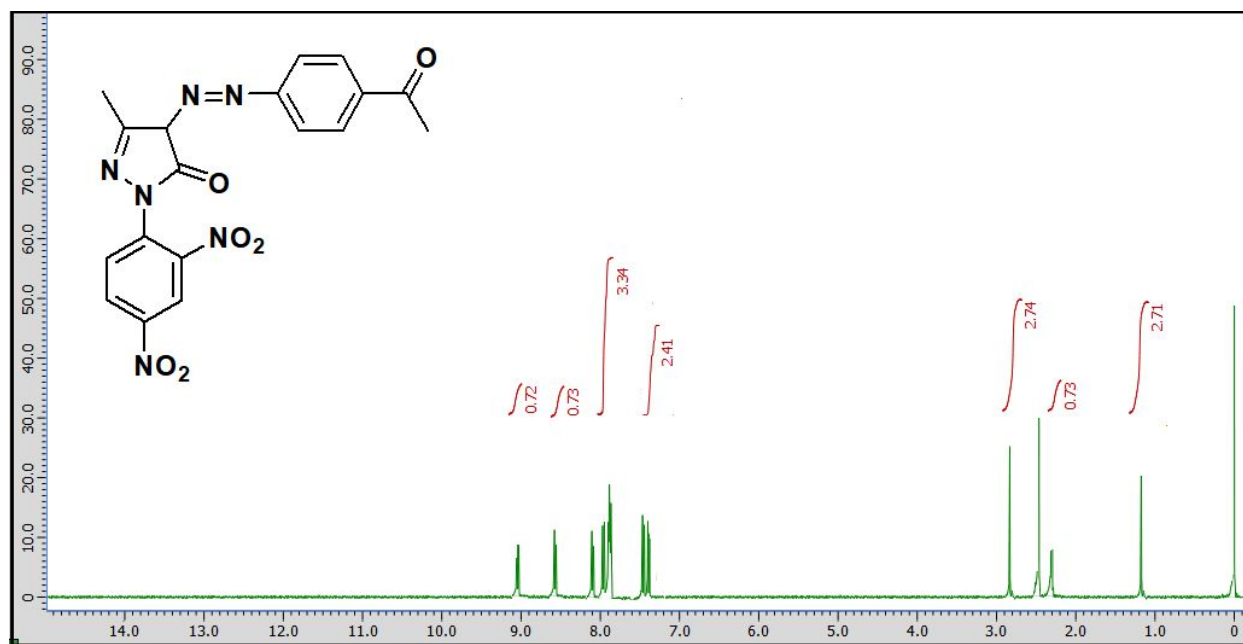

<sup>1</sup>H-NMR of compound 2c

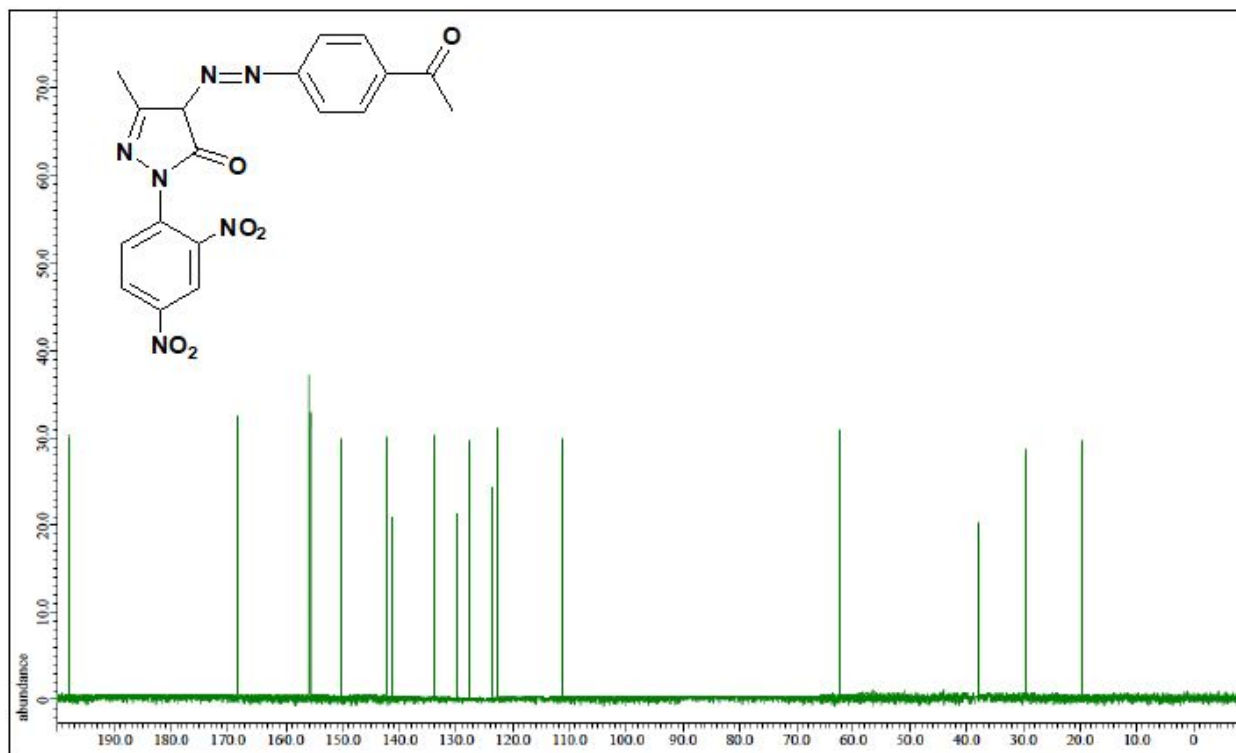

<sup>13</sup>C-NMR of compound 2c

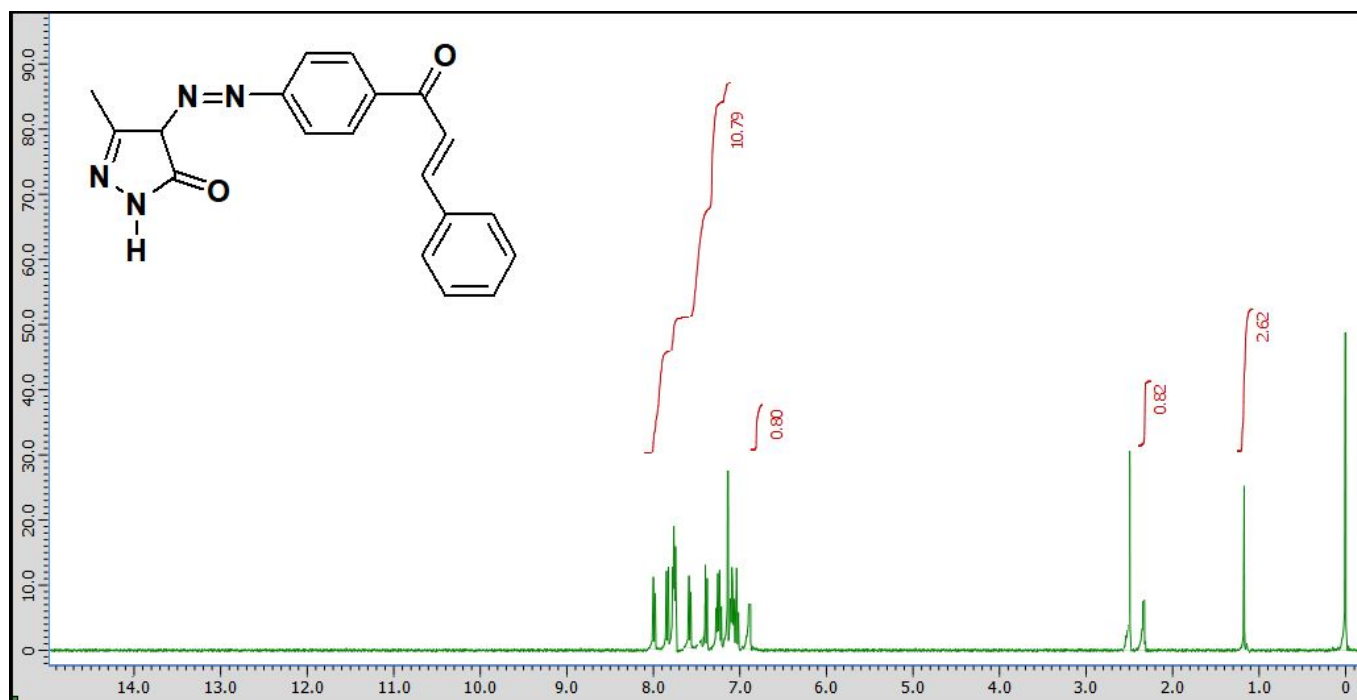

<sup>1</sup>H-NMR of compound 3a

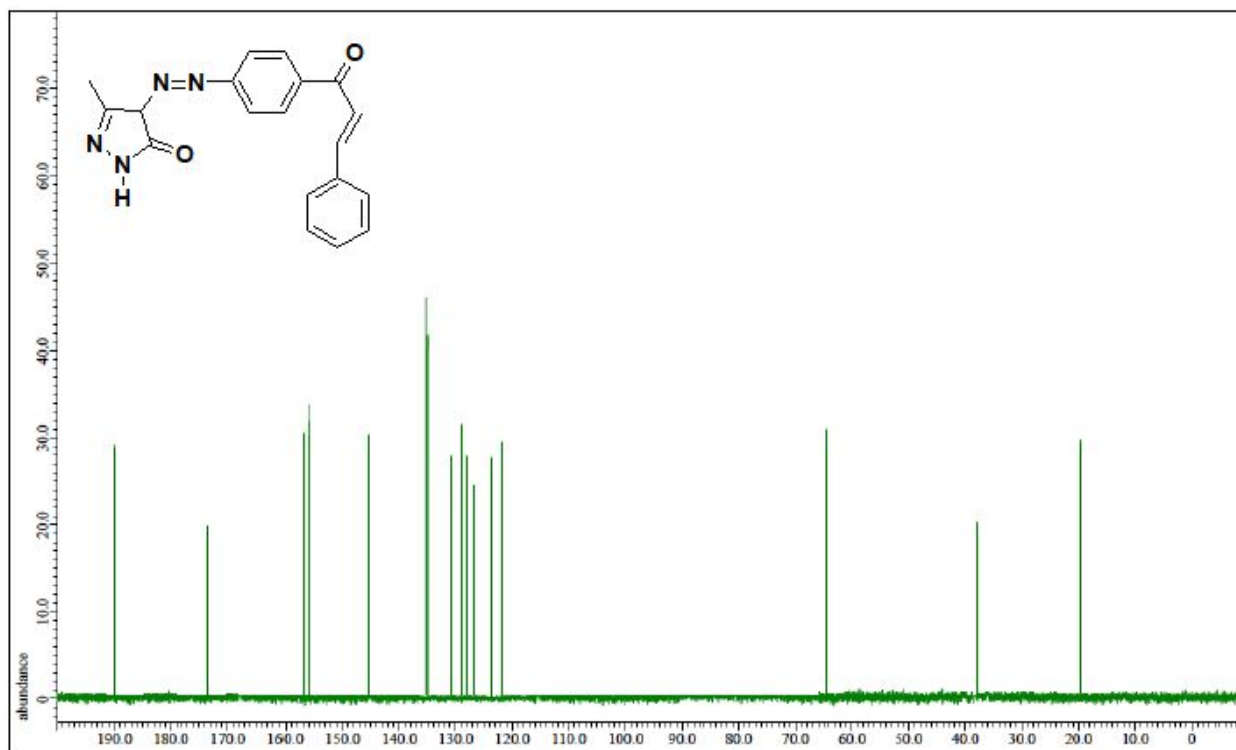

$^{13}\text{C}$ -NMR of compound 3a

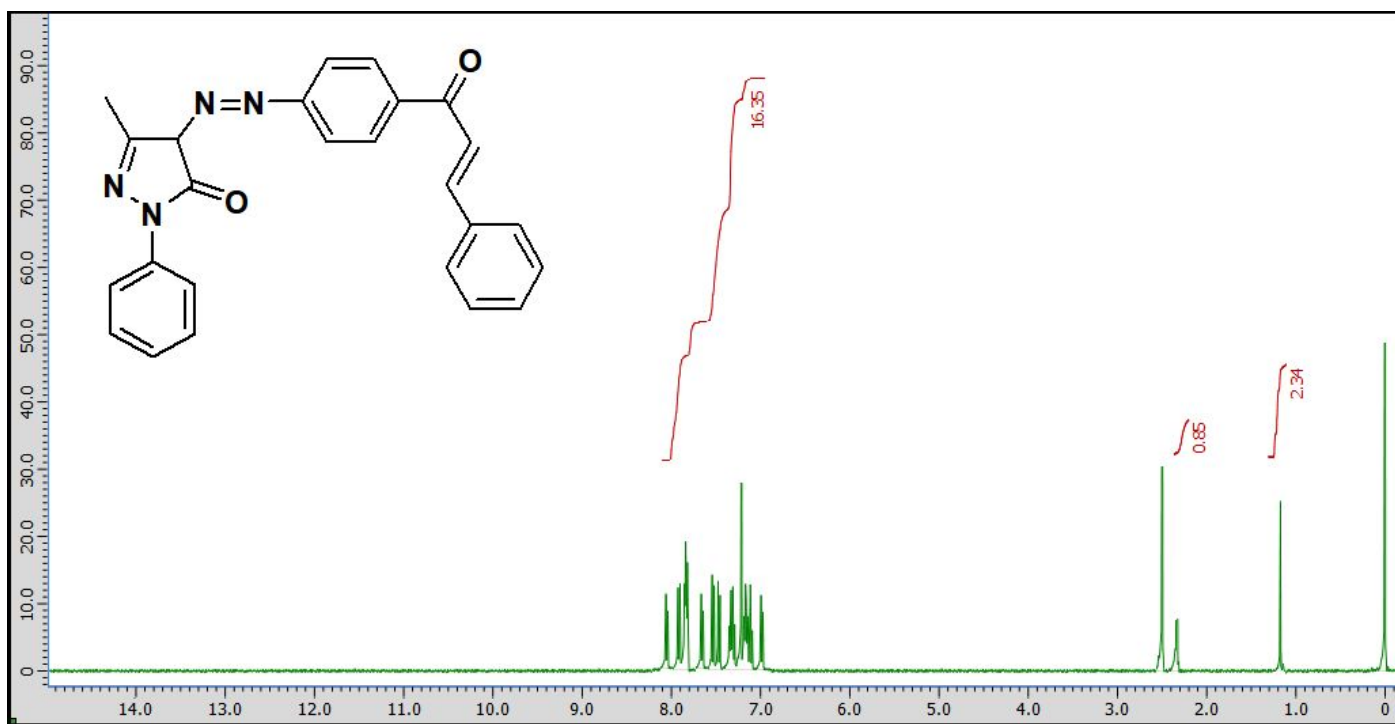

<sup>1</sup>H-NMR of compound 3b



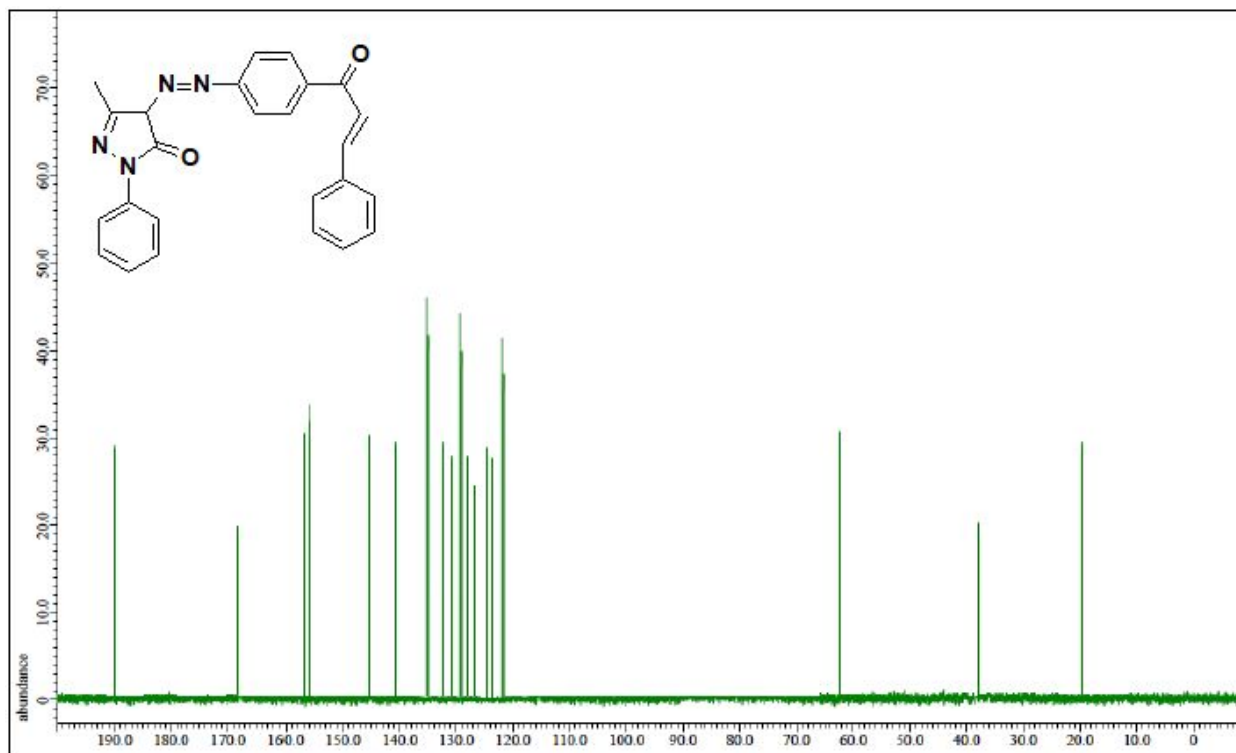

<sup>13</sup>C-NMR of compound 3b

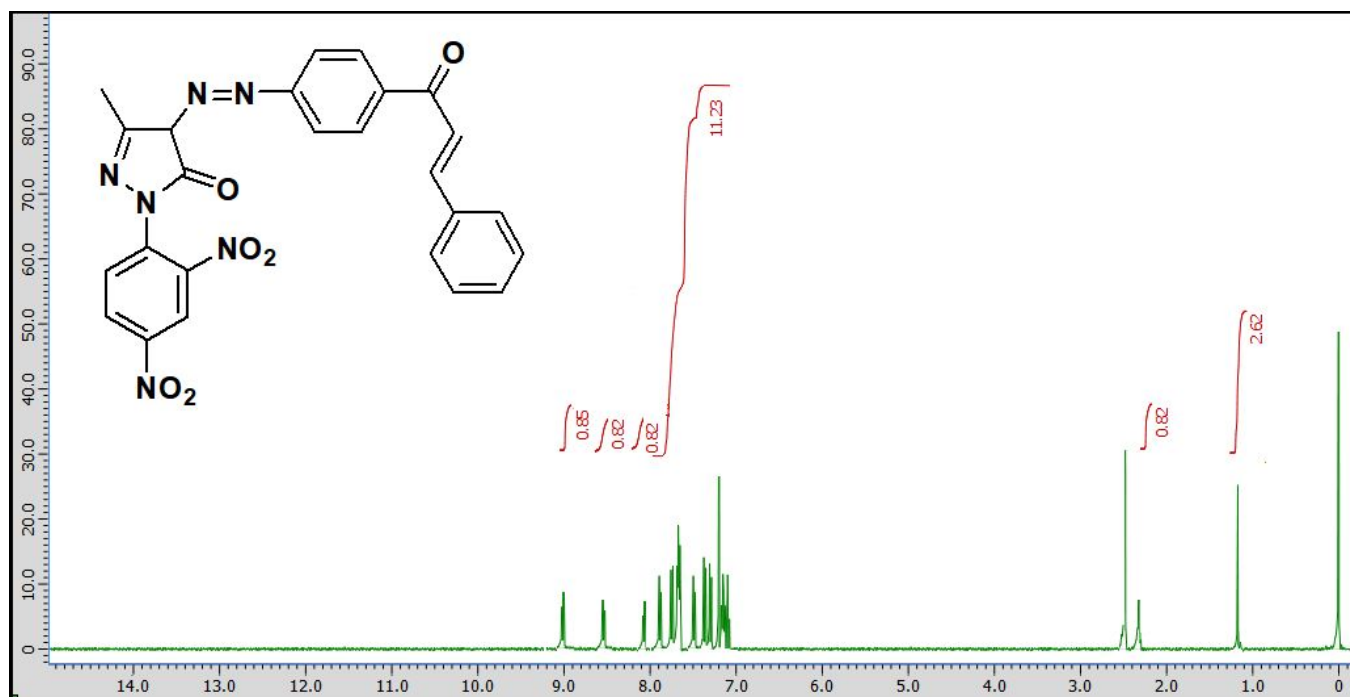

<sup>1</sup>H-NMR of compound 3c

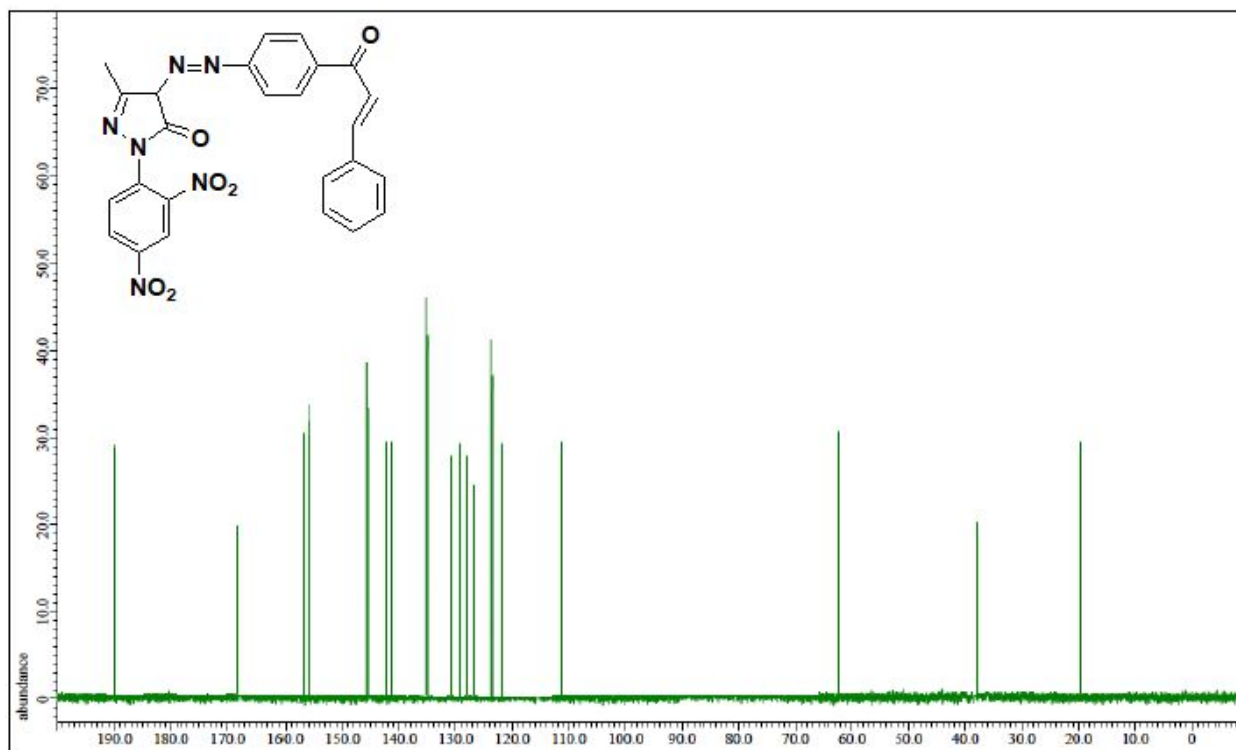

<sup>13</sup>C-NMR of compound 3c

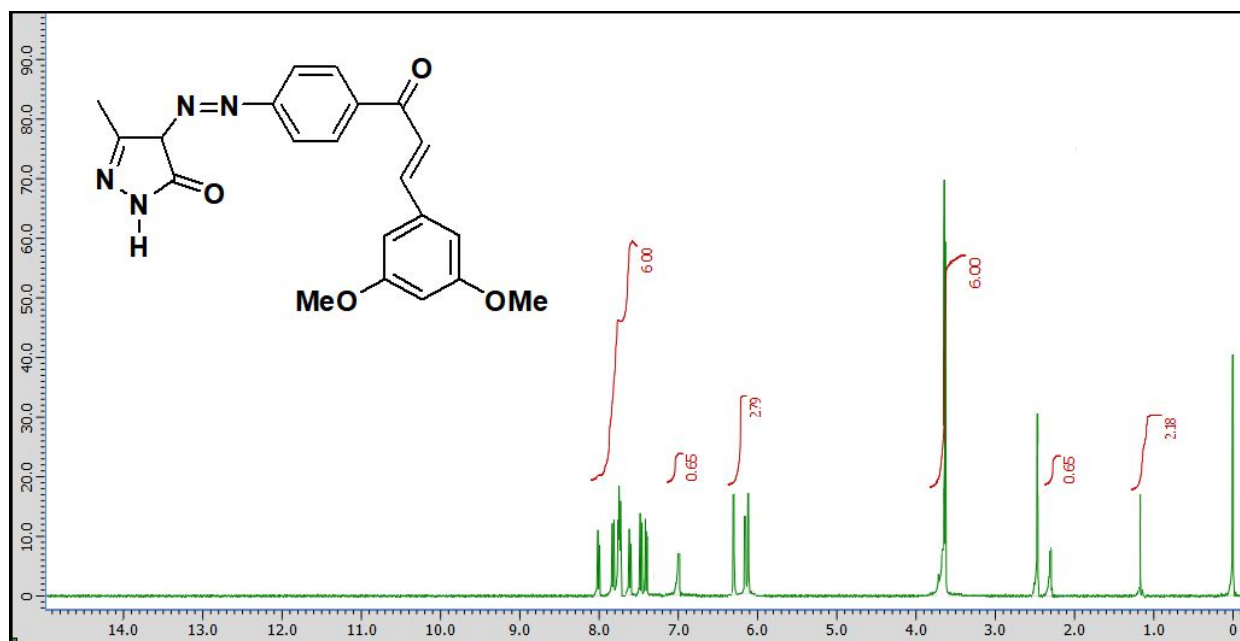

<sup>1</sup>H-NMR of compound 4a

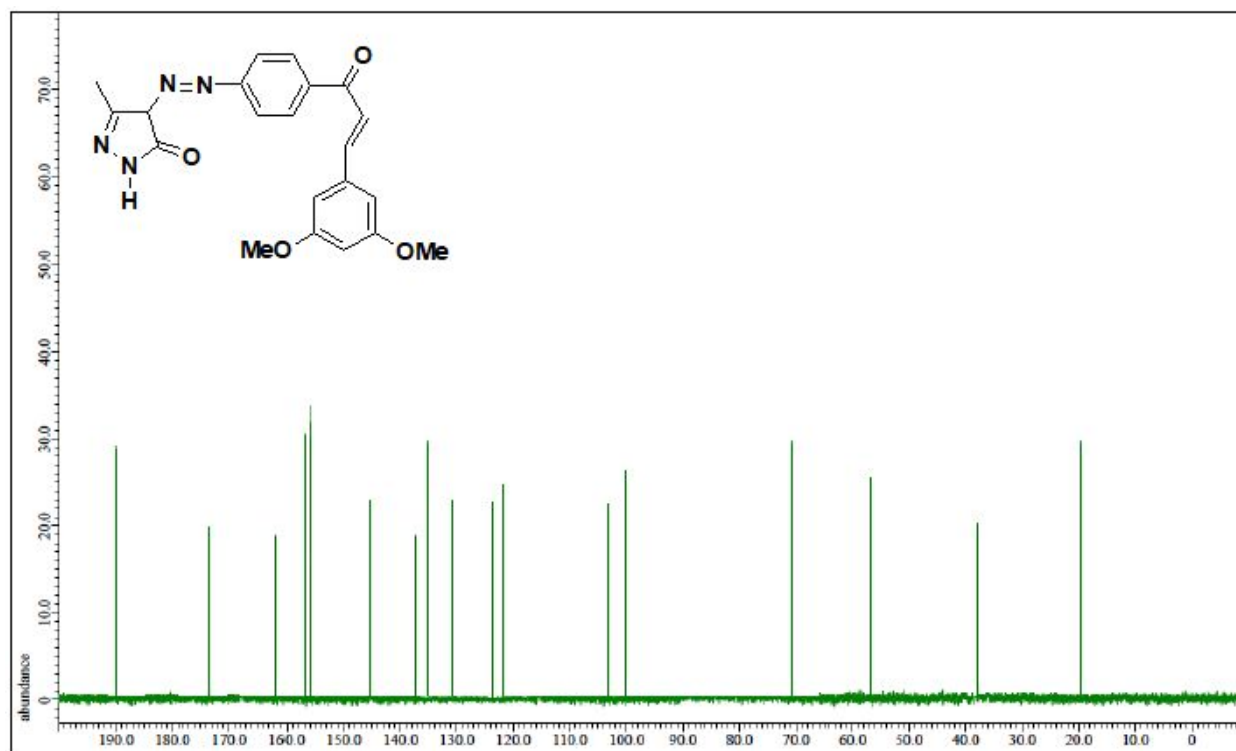

<sup>13</sup>C-NMR of compound 4a

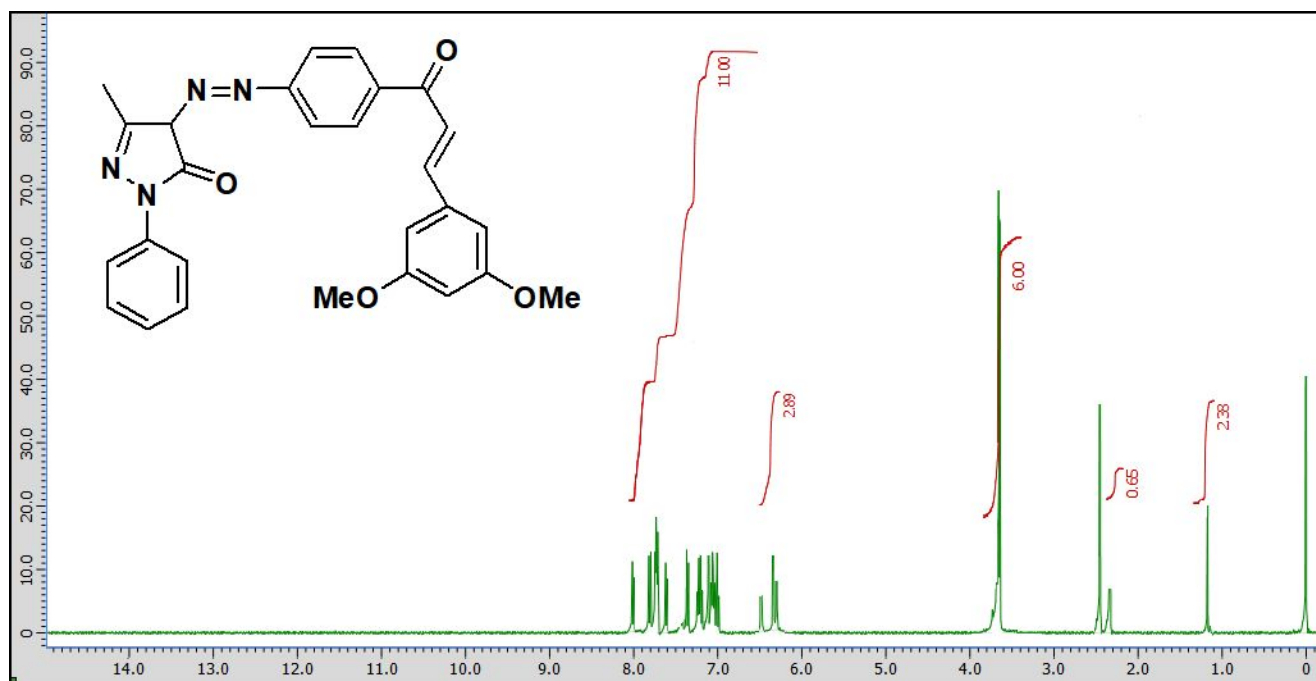

<sup>1</sup>H-NMR of compound 4b

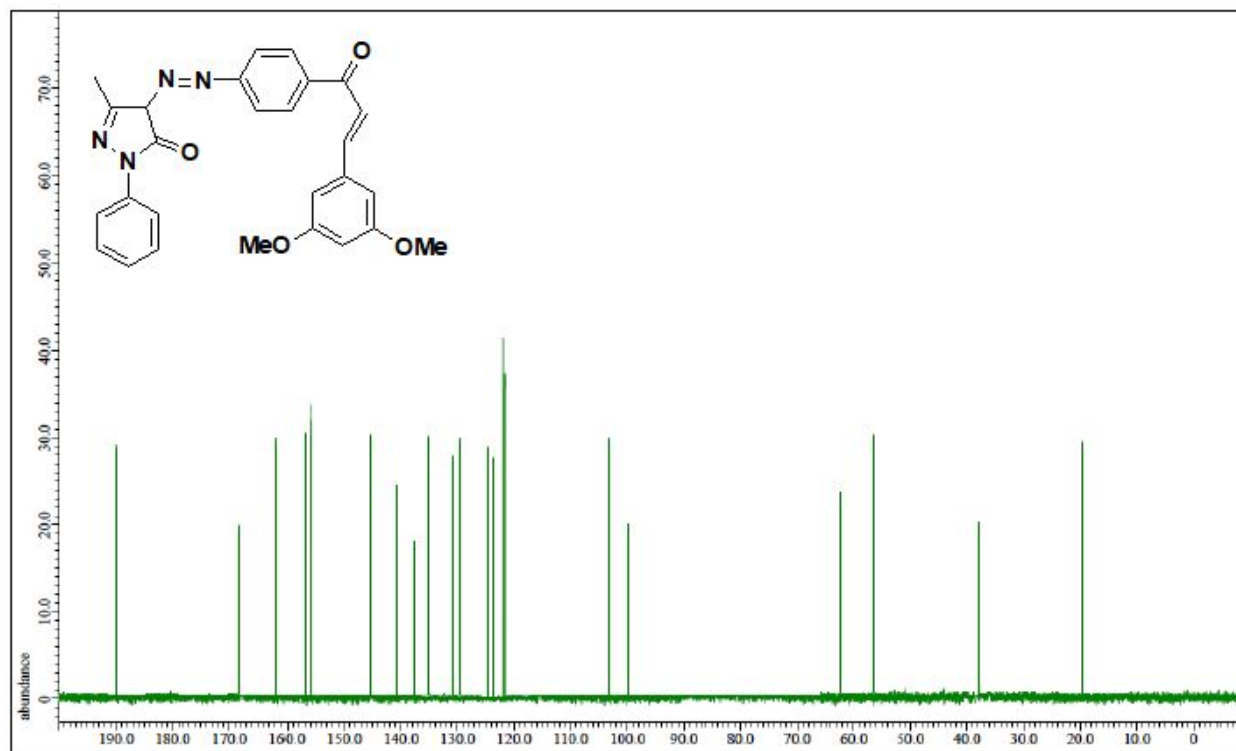

<sup>13</sup>C-NMR of compound 4b

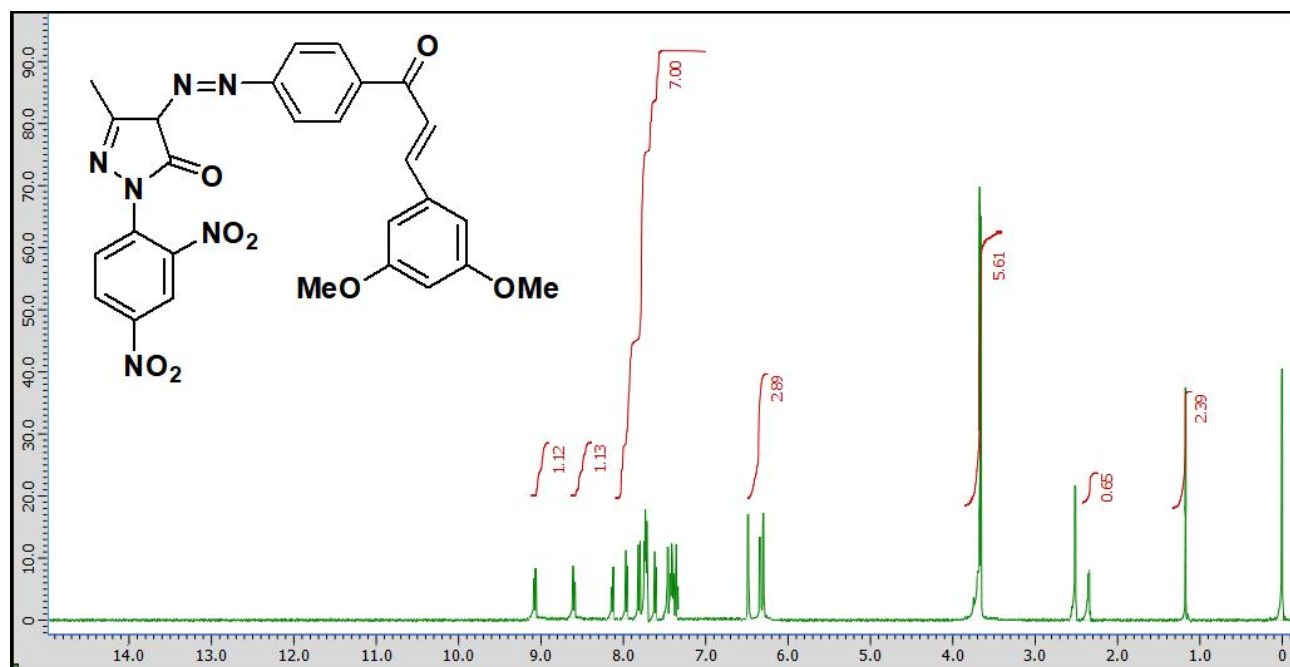

<sup>1</sup>H-NMR of compound 4c



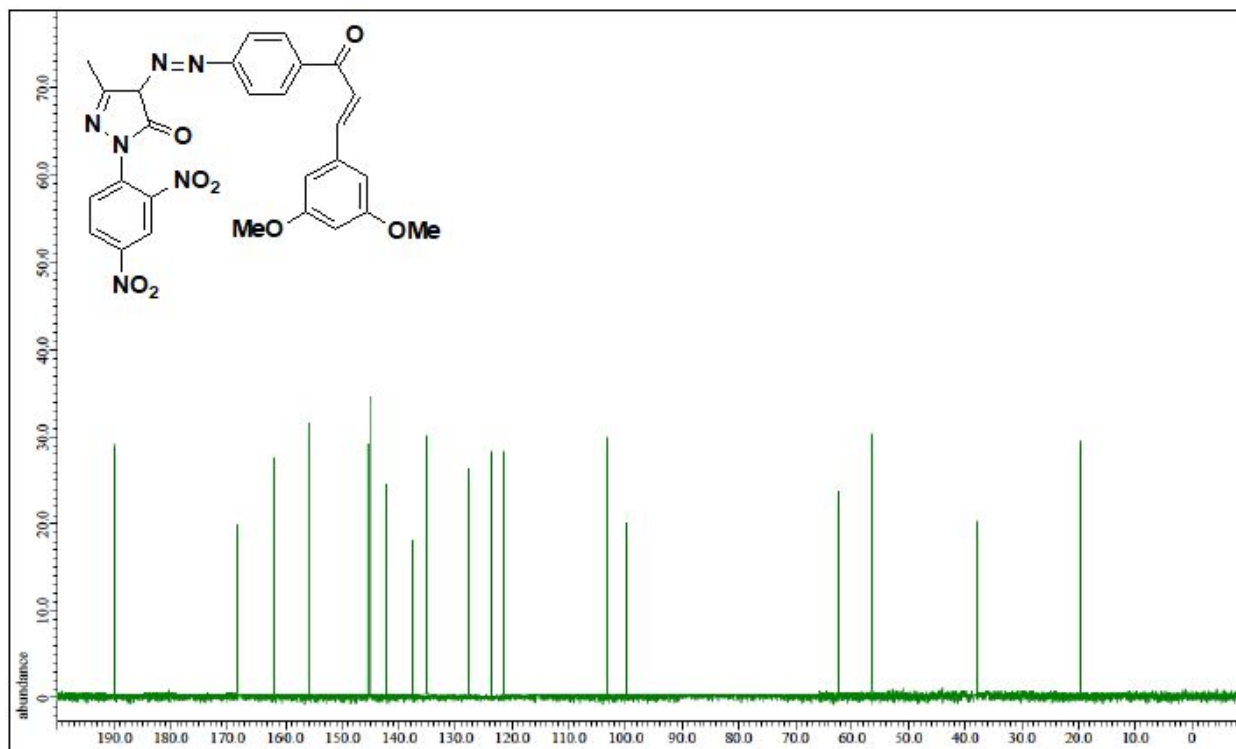

<sup>13</sup>C-NMR of compound 4c

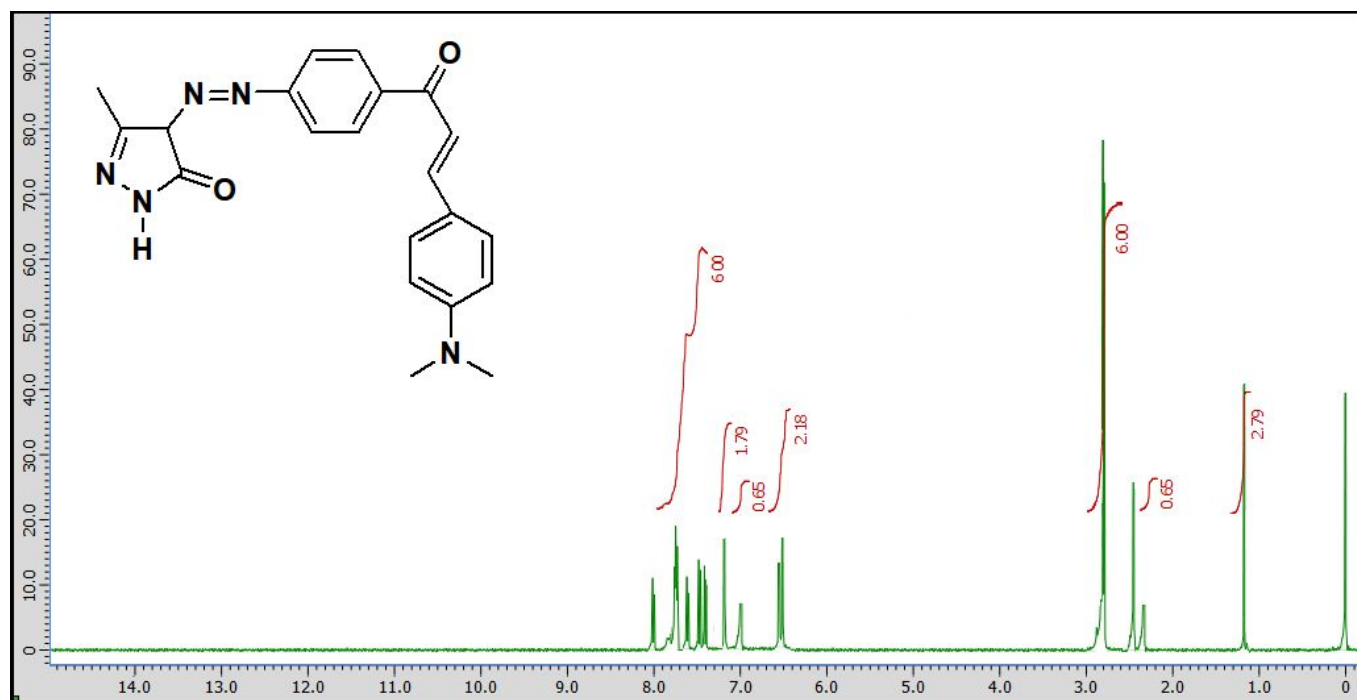

<sup>1</sup>H-NMR of compound 5a

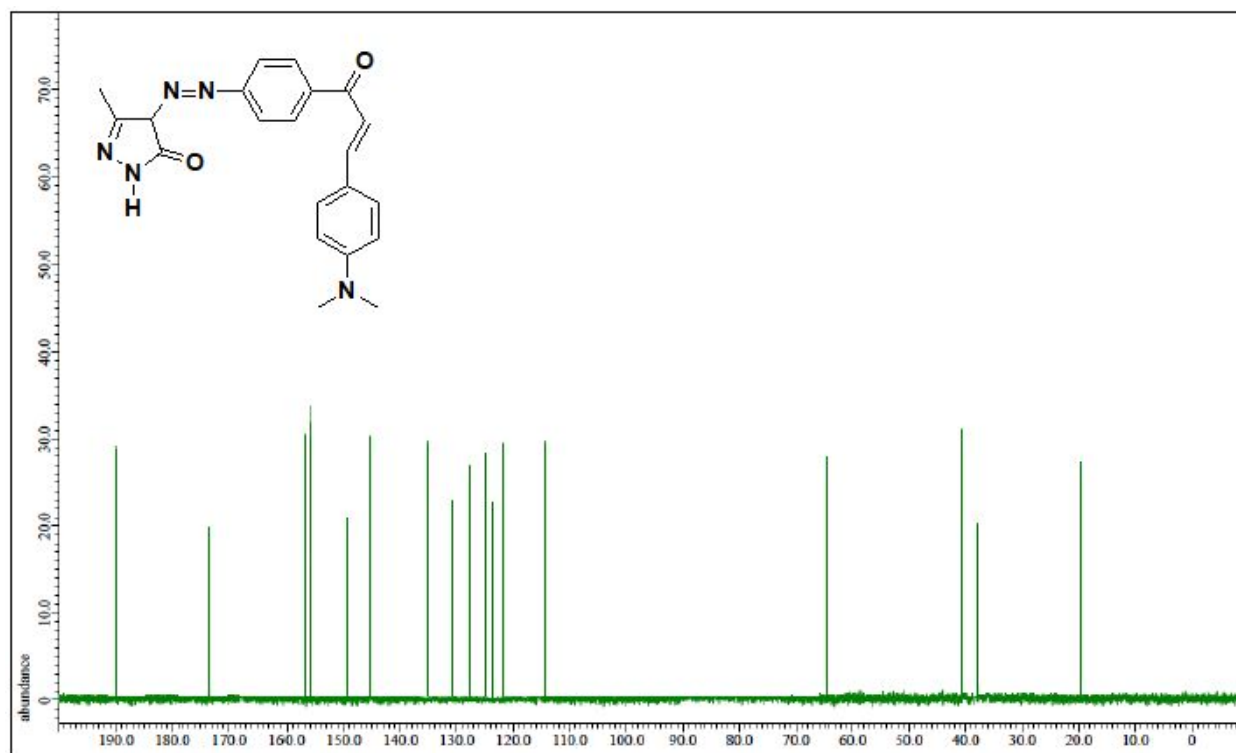

<sup>13</sup>C-NMR of compound 5a

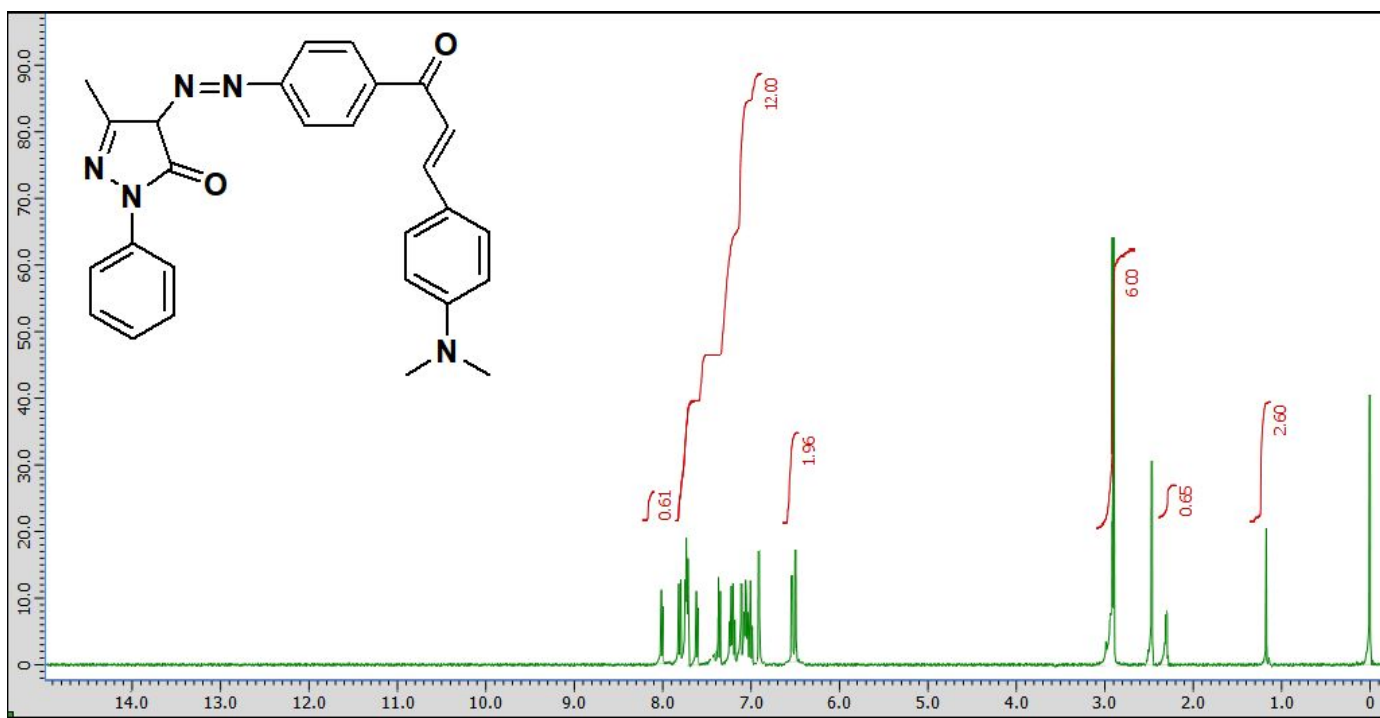

<sup>1</sup>H-NMR of compound 5b

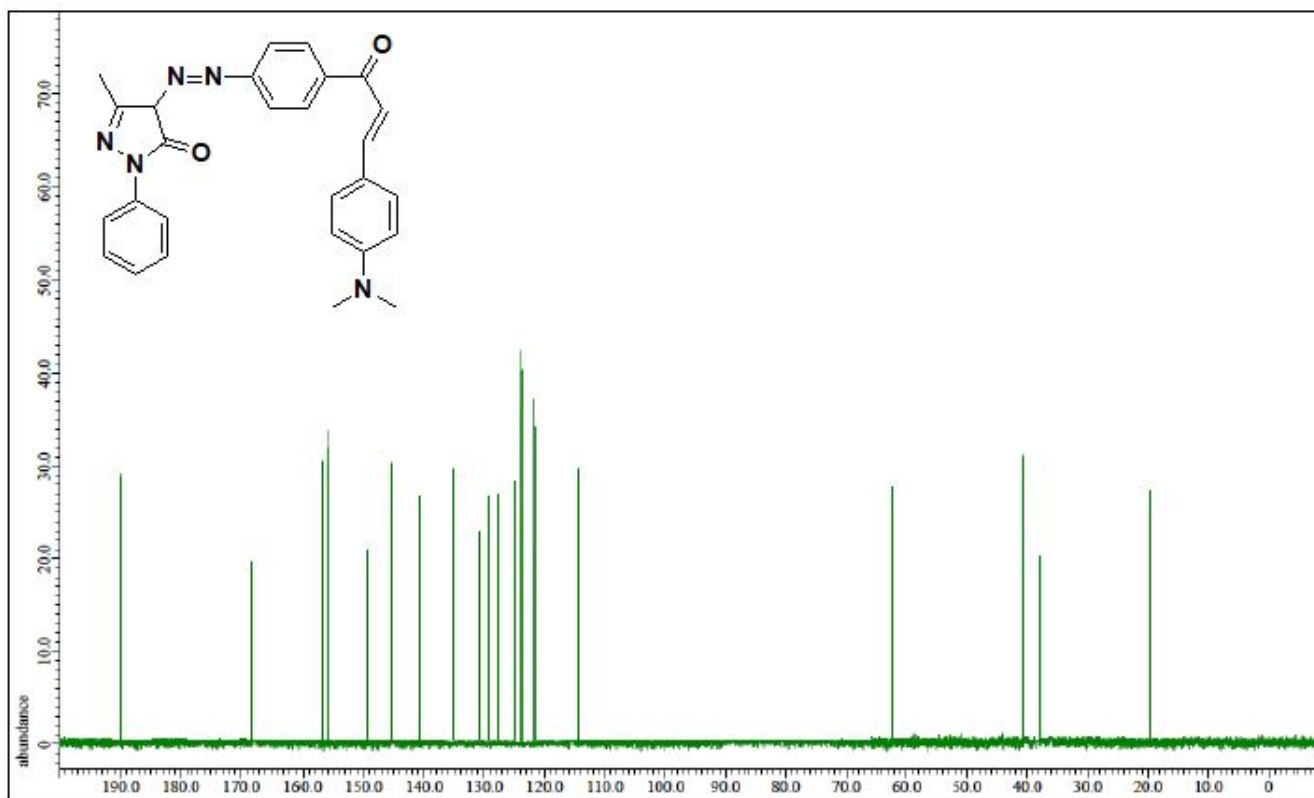

<sup>13</sup>C-NMR of compound 5b

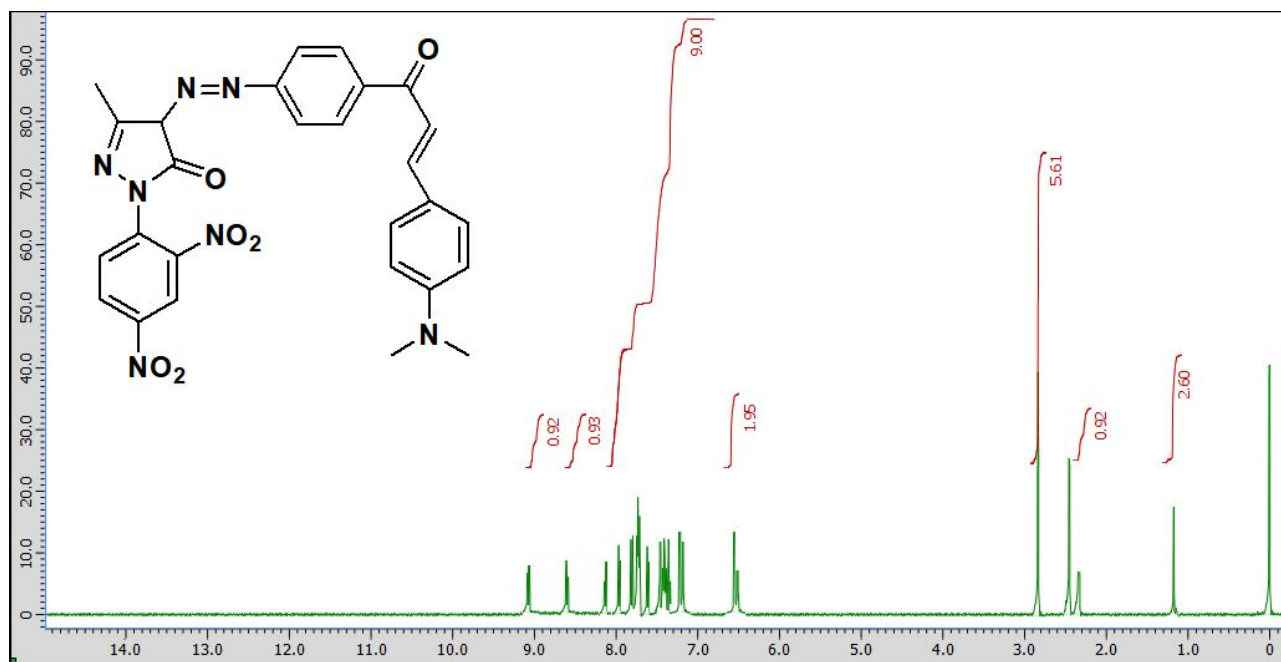

<sup>1</sup>H-NMR of compound 5c

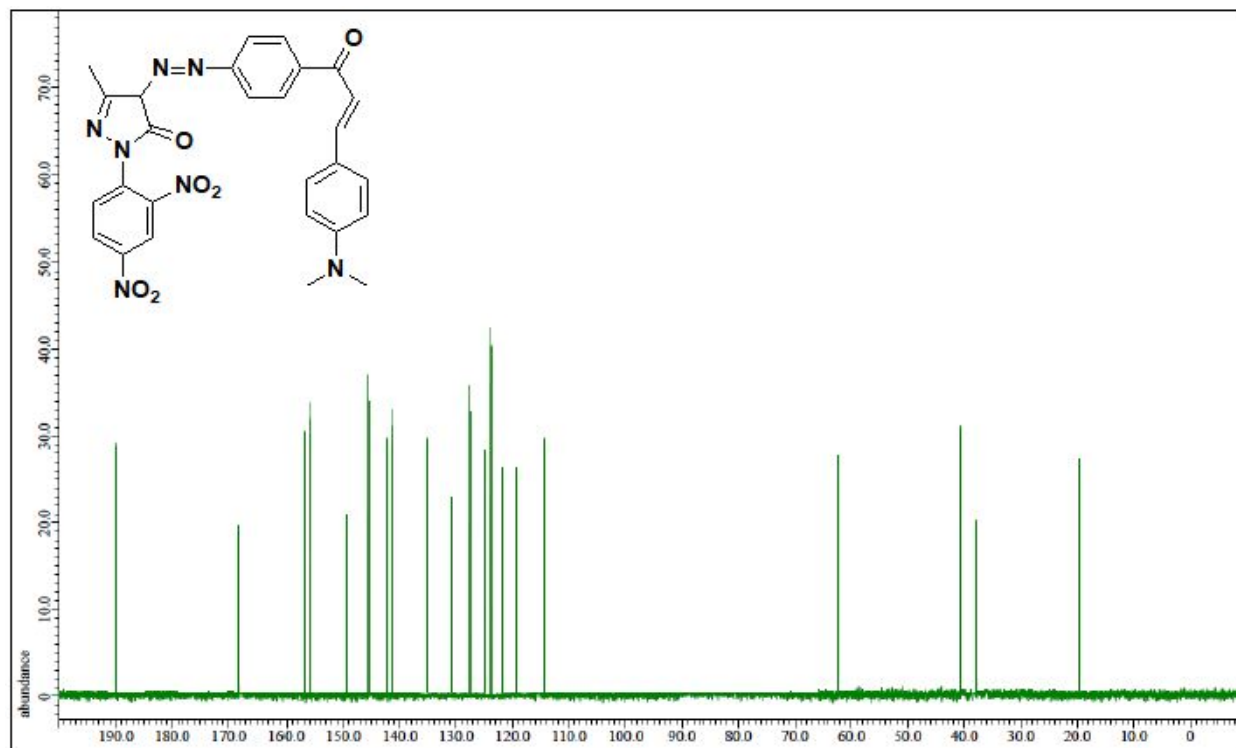

<sup>13</sup>C-NMR of compound 5c

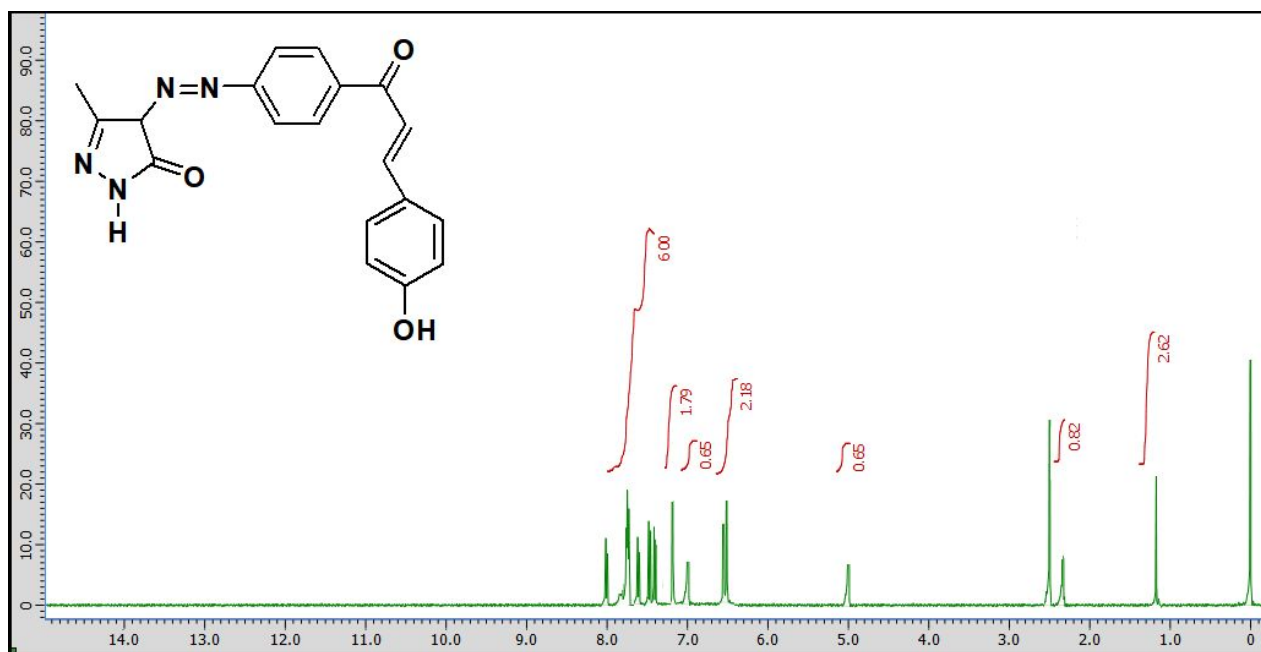

<sup>1</sup>H-NMR of compound 6a



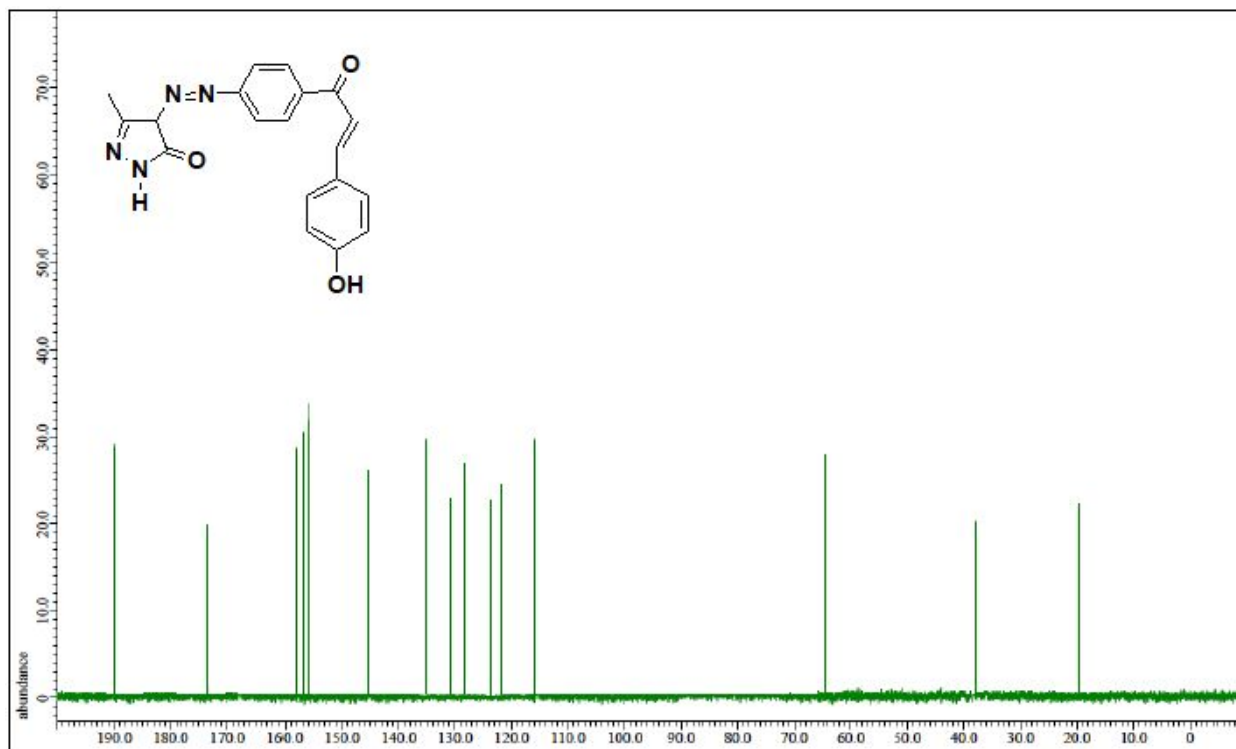

<sup>13</sup>C-NMR of compound 6a

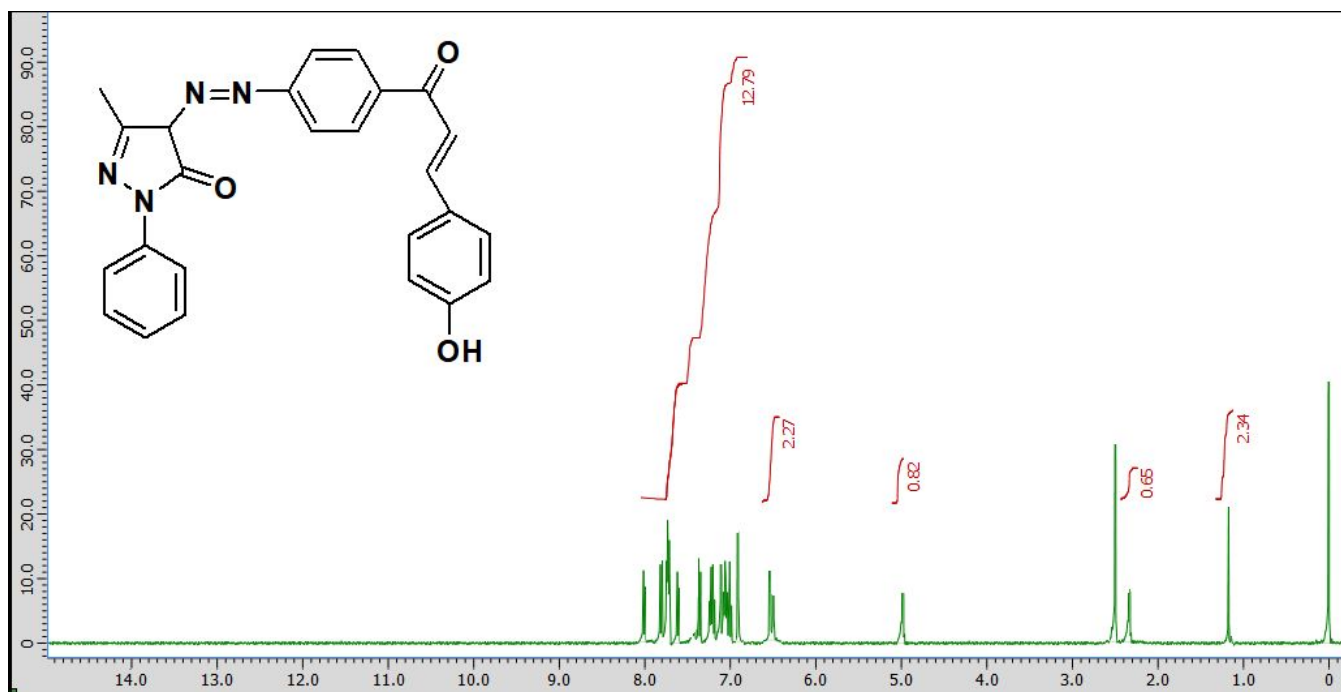

<sup>1</sup>H-NMR of compound 6b

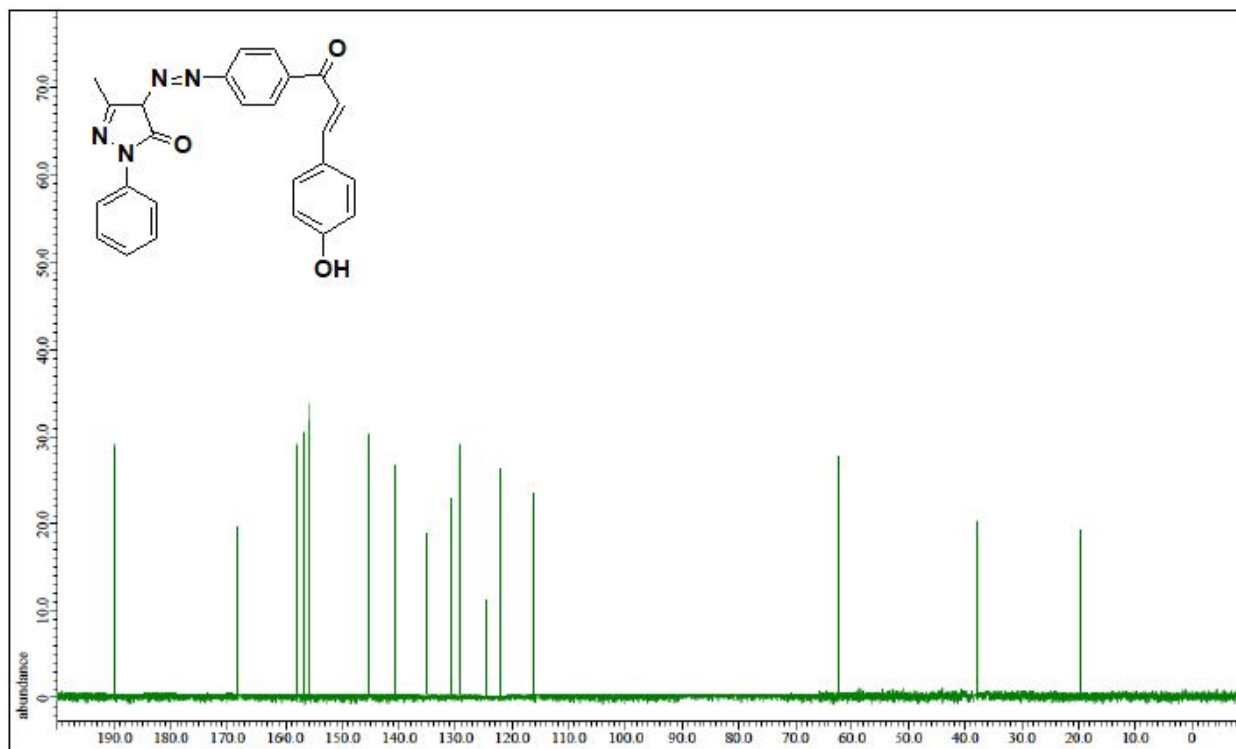

<sup>13</sup>C-NMR of compound 6b

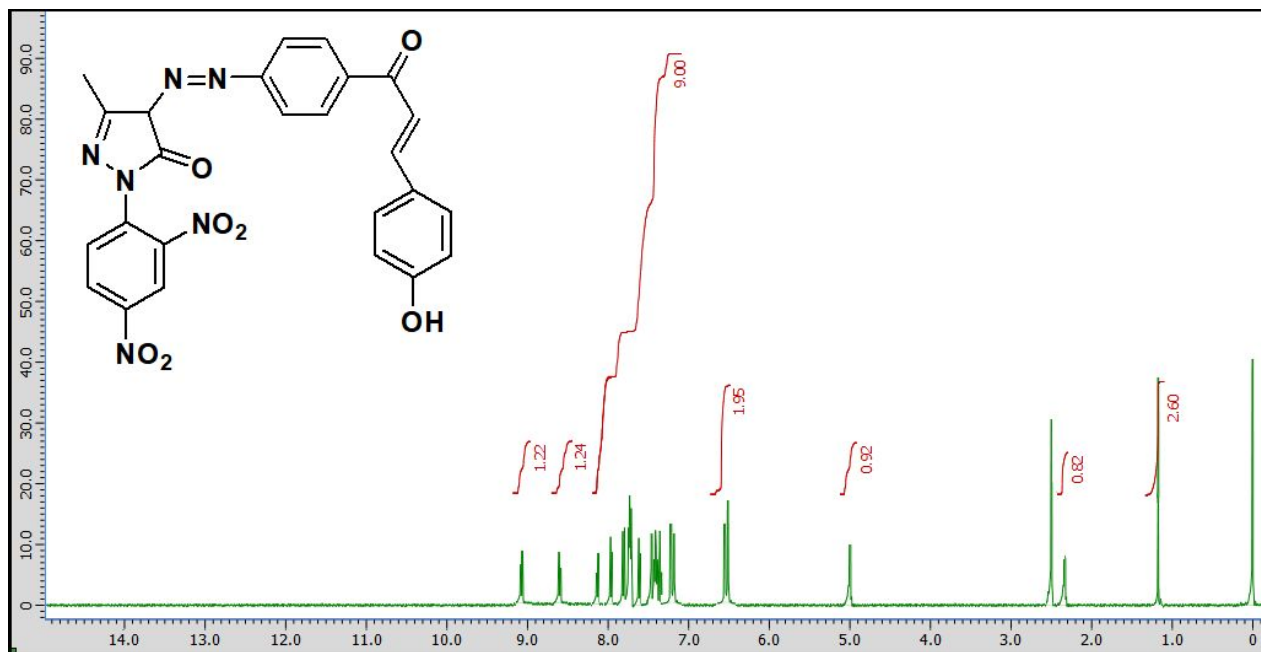

<sup>1</sup>H-NMR of compound 6c

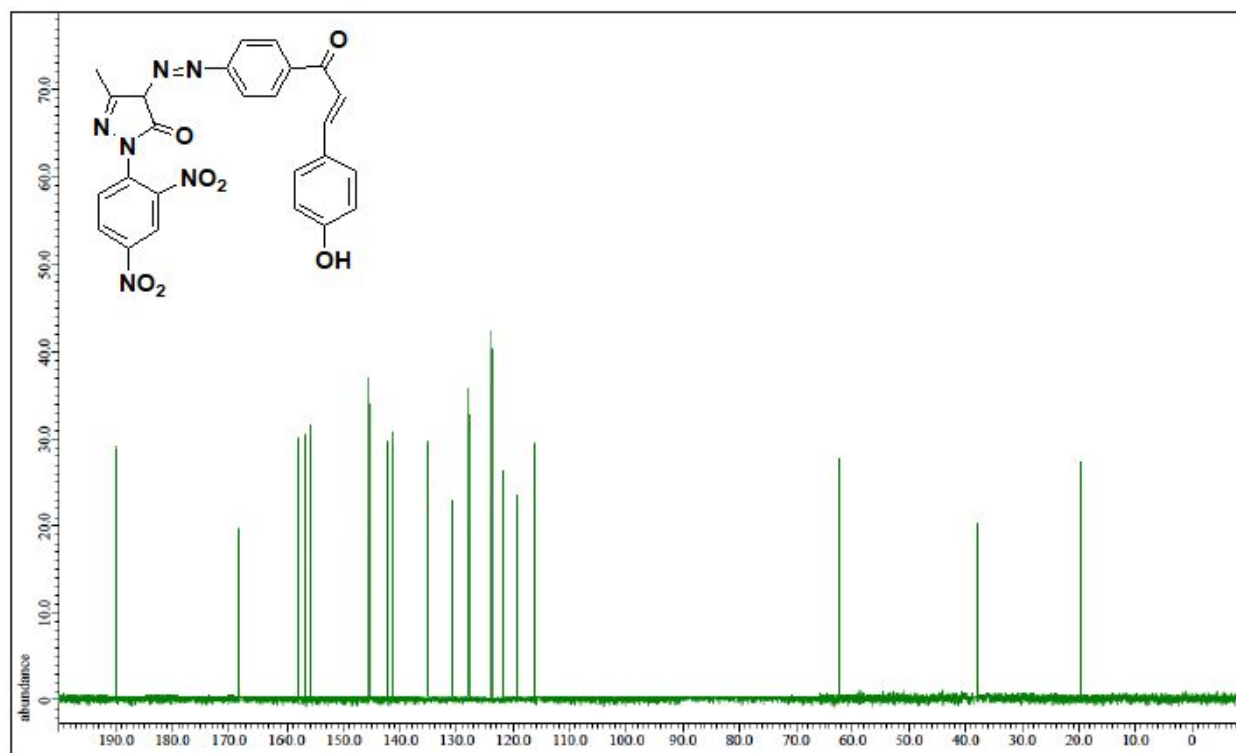

<sup>13</sup>C-NMR of compound 6c

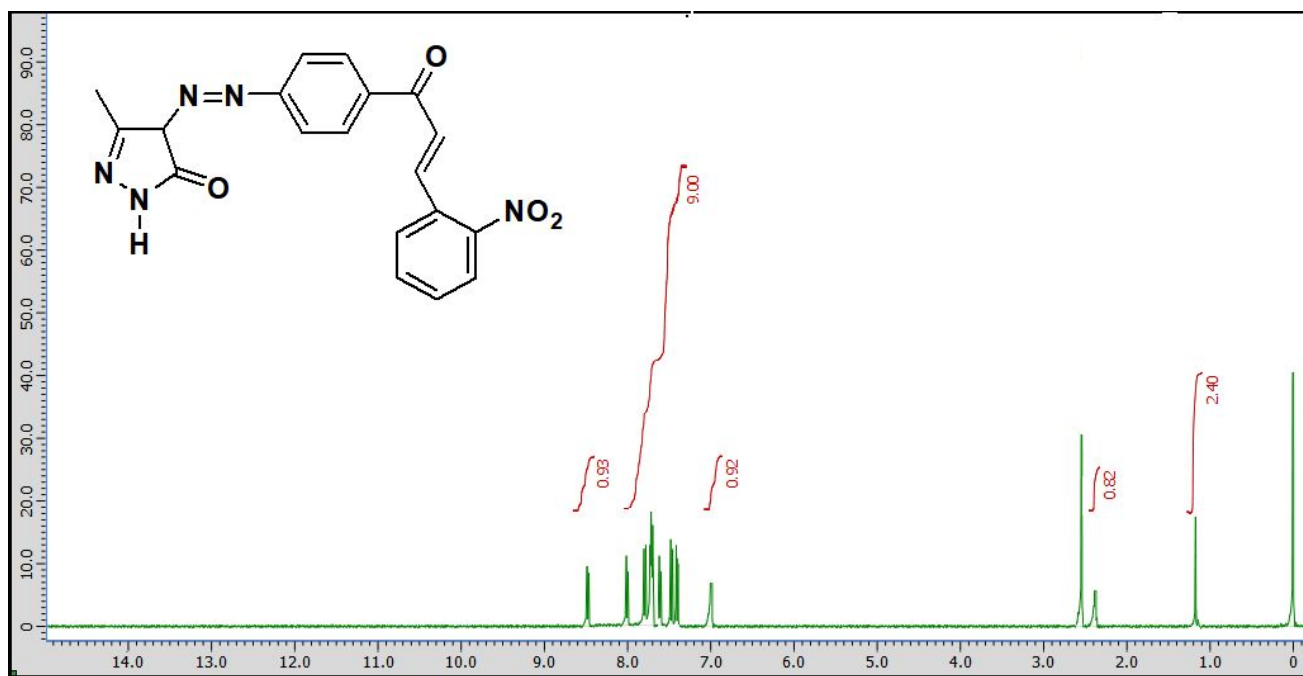

<sup>1</sup>H-NMR of compound 7a

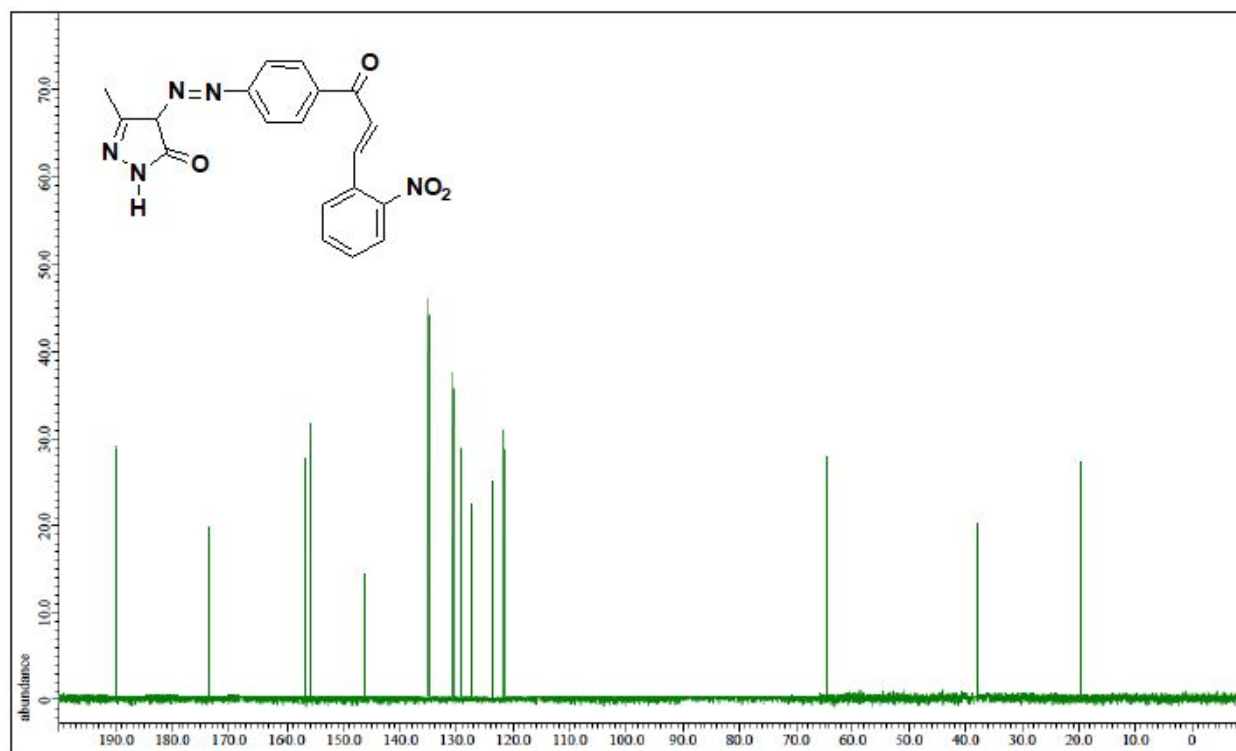

$^{13}\text{C}$ -NMR of compound 7a

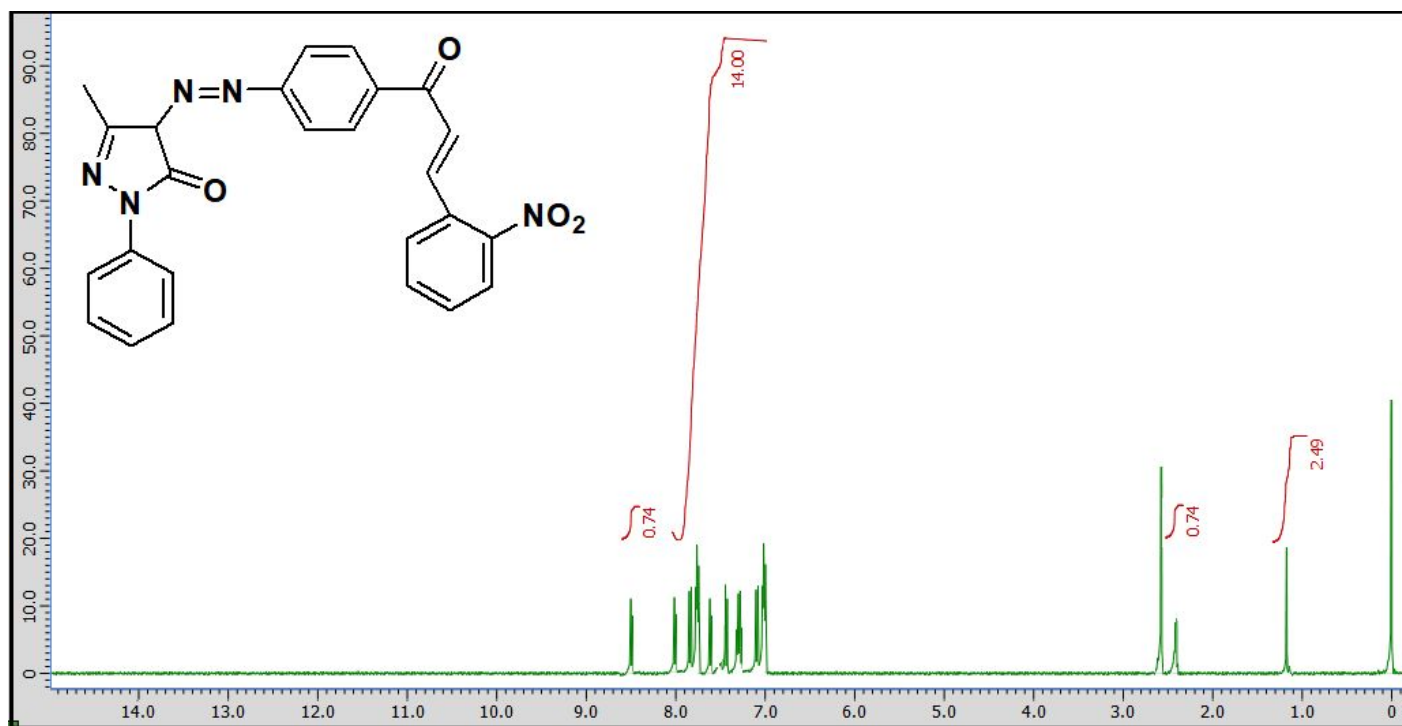

<sup>1</sup>H-NMR of compound 7b



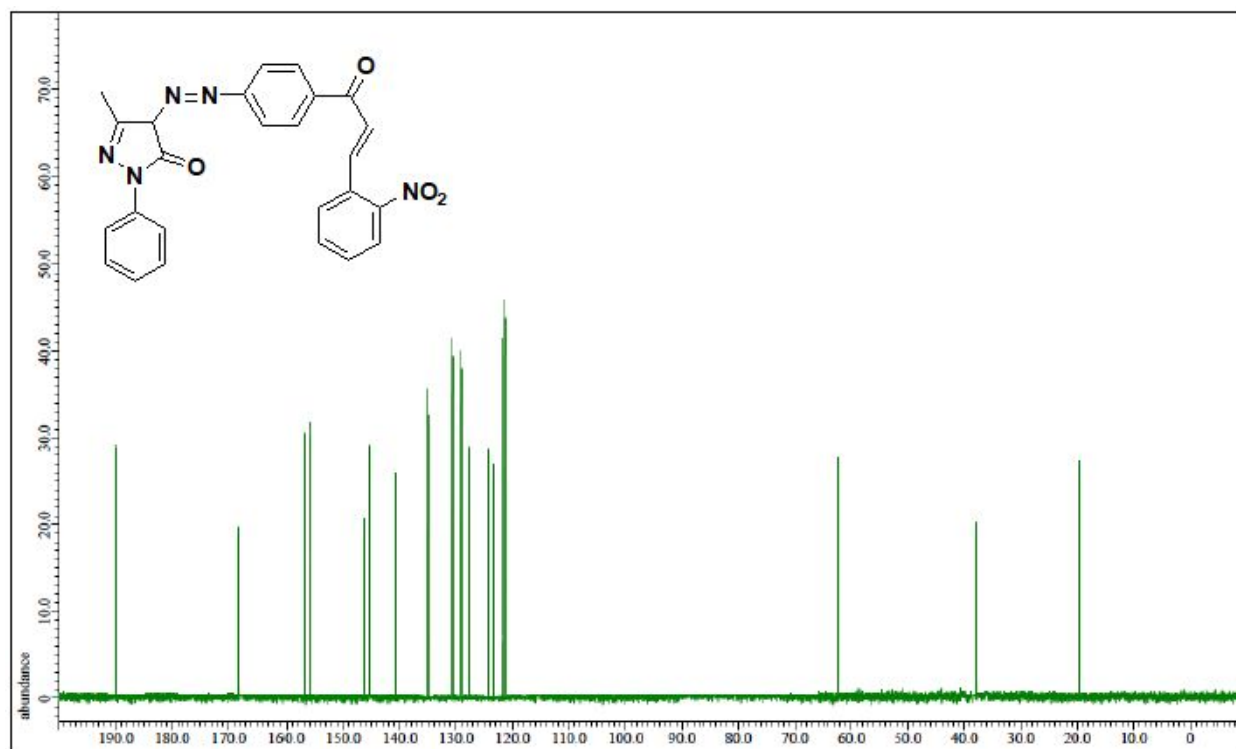

$^{13}\text{C}$ -NMR of compound 7b

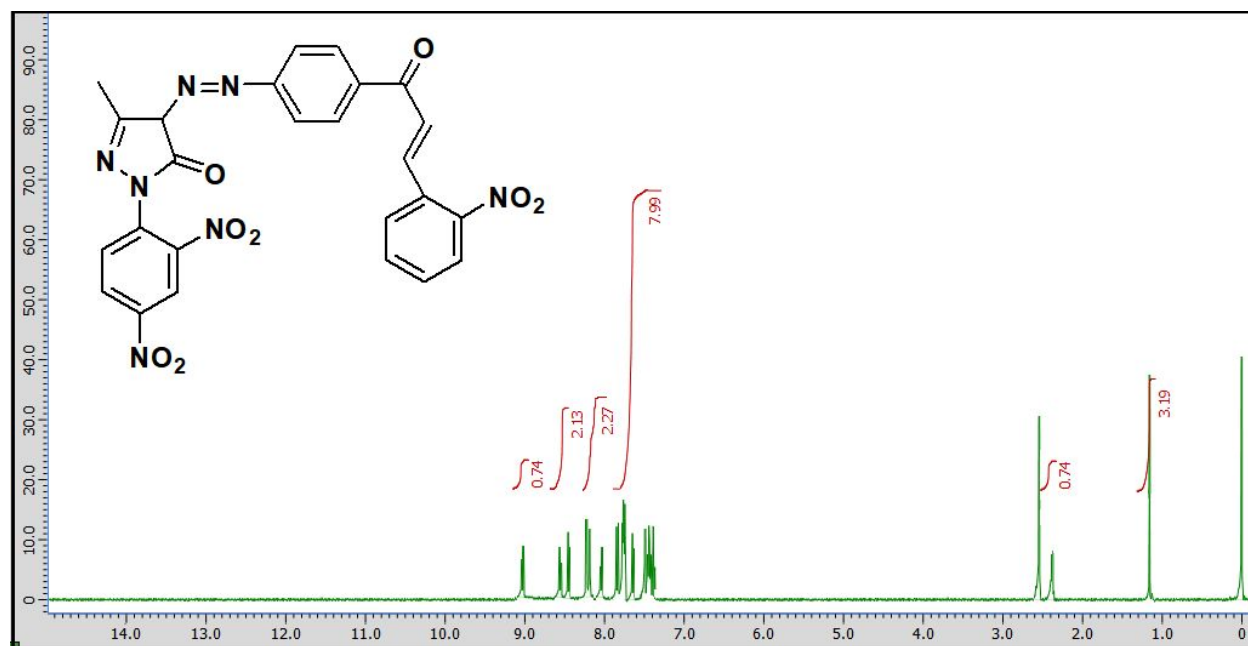

<sup>1</sup>H-NMR of compound 7c

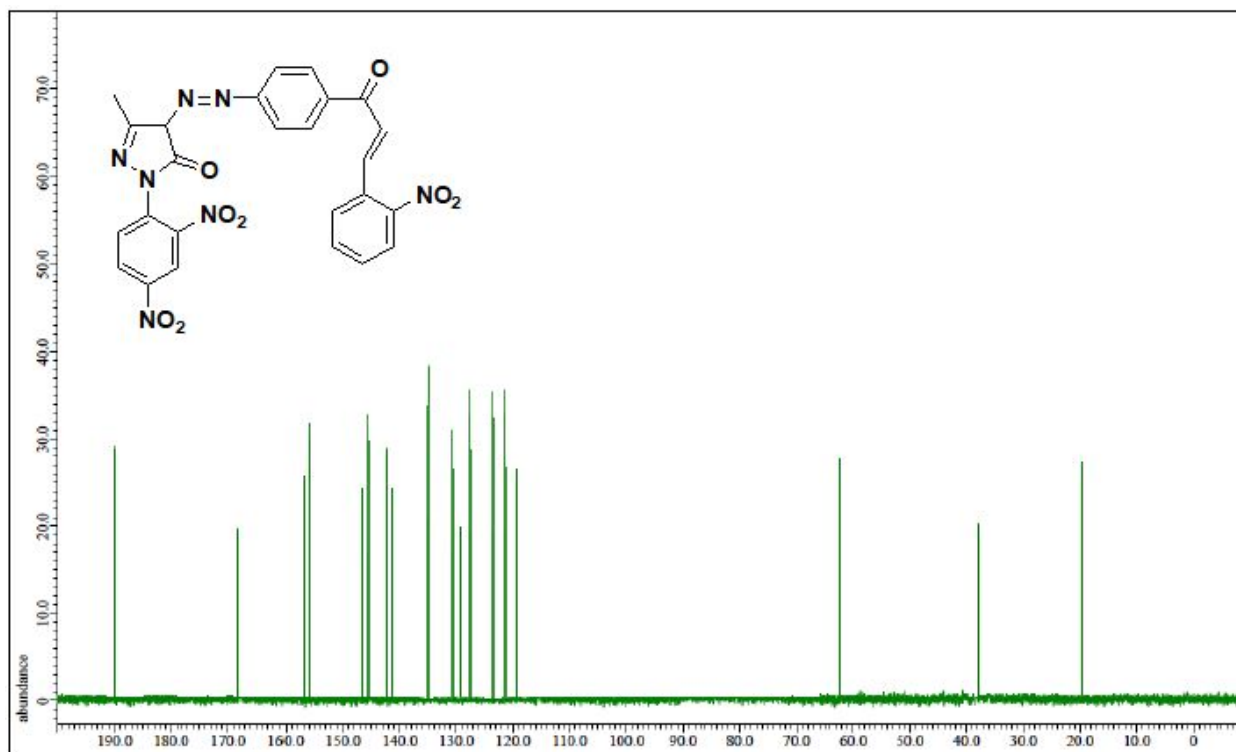

<sup>13</sup>C-NMR of compound 7c

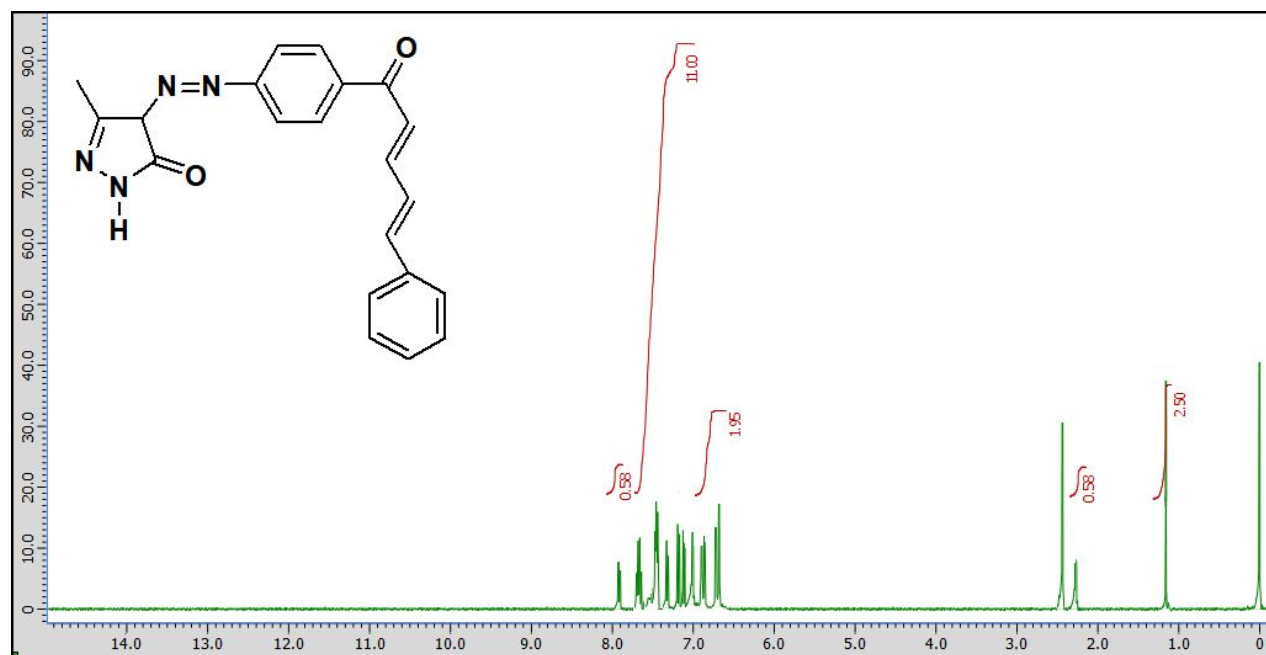

<sup>1</sup>H-NMR of compound 8a

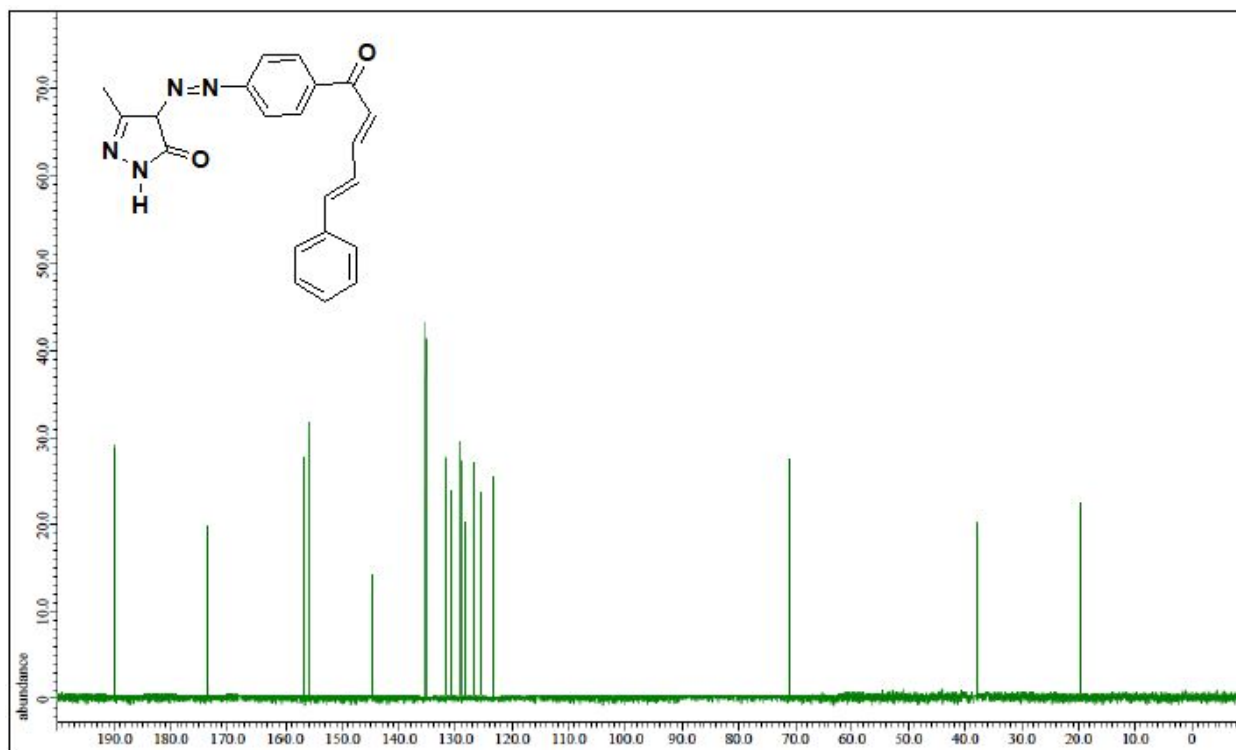

<sup>13</sup>C-NMR of compound 8a

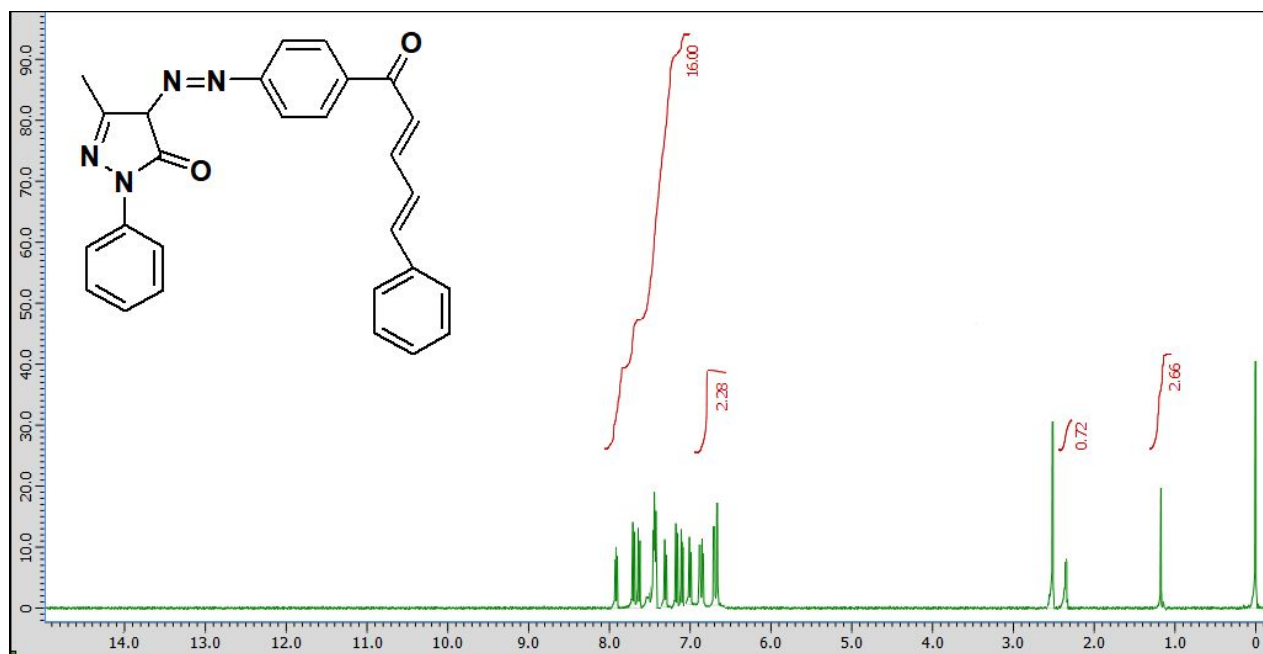

<sup>1</sup>H-NMR of compound 8b

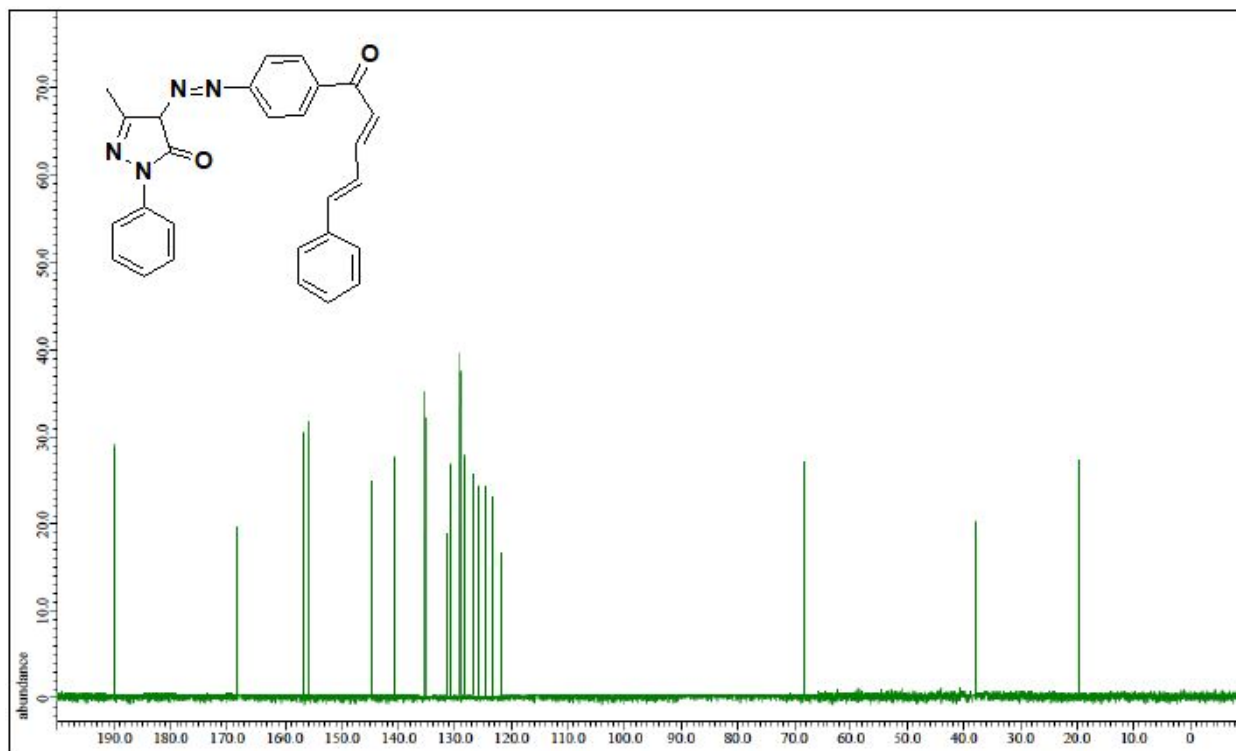

$^{13}\text{C}$ -NMR of compound 8b

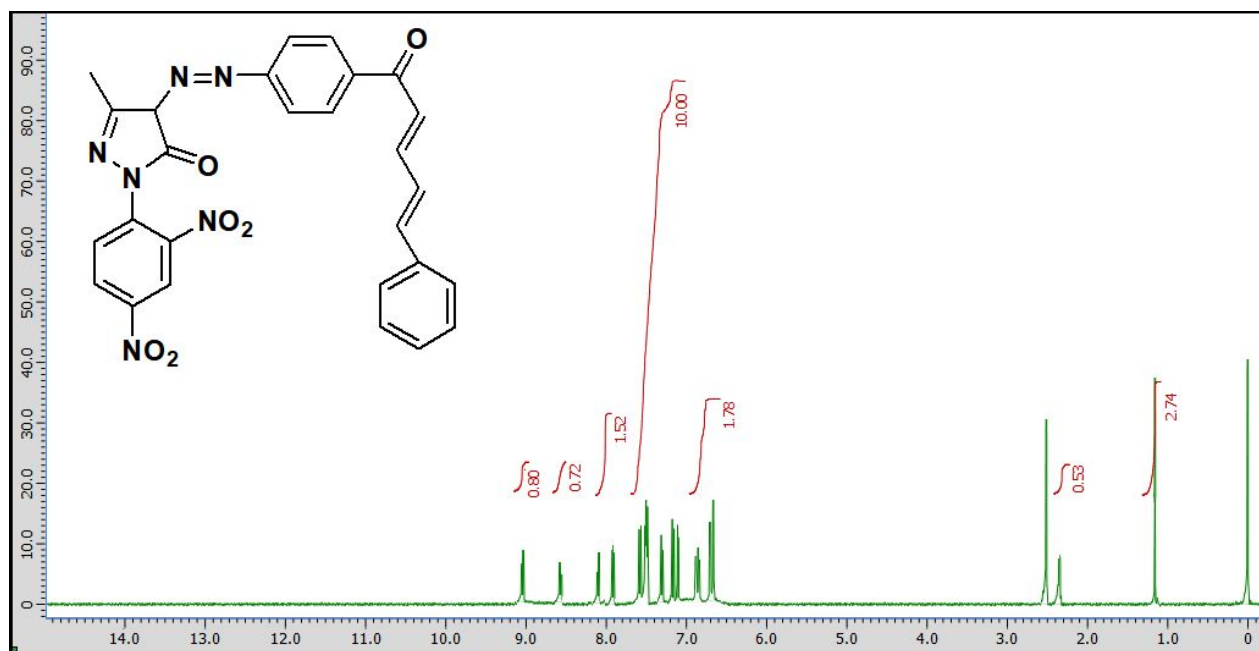

<sup>1</sup>H-NMR of compound 8c



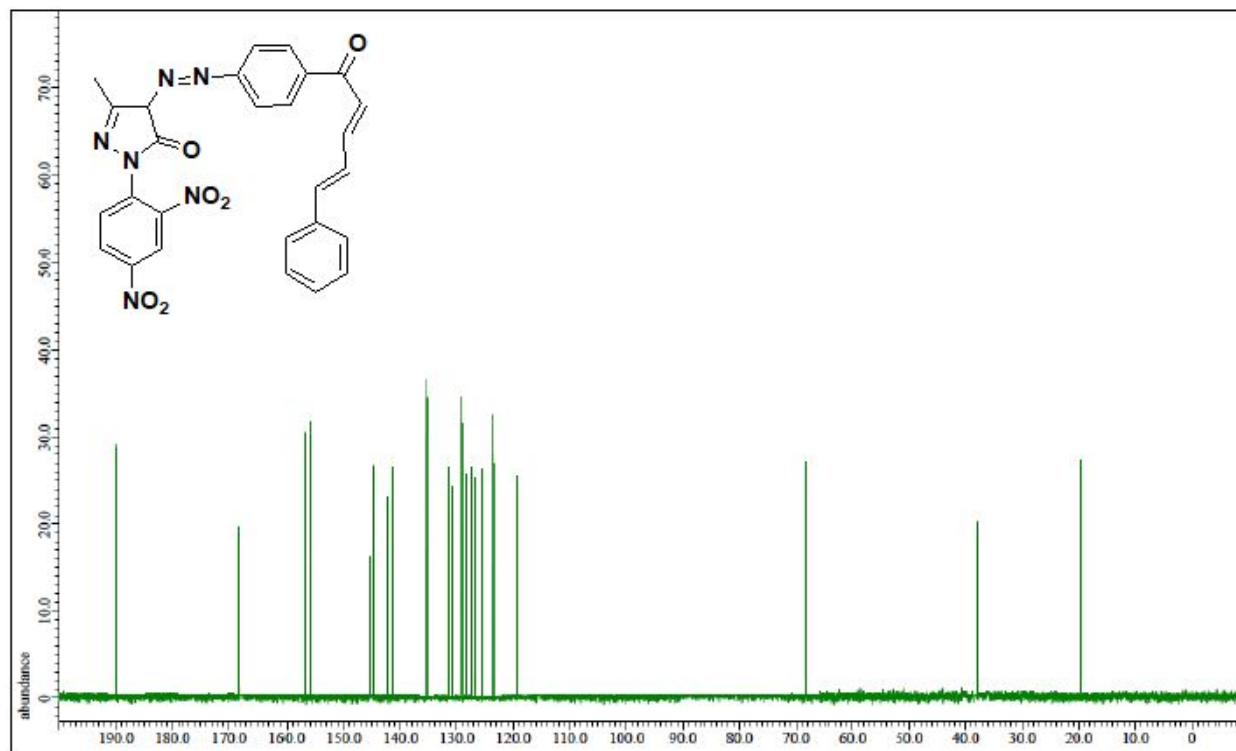

<sup>13</sup>C-NMR of compound 8c

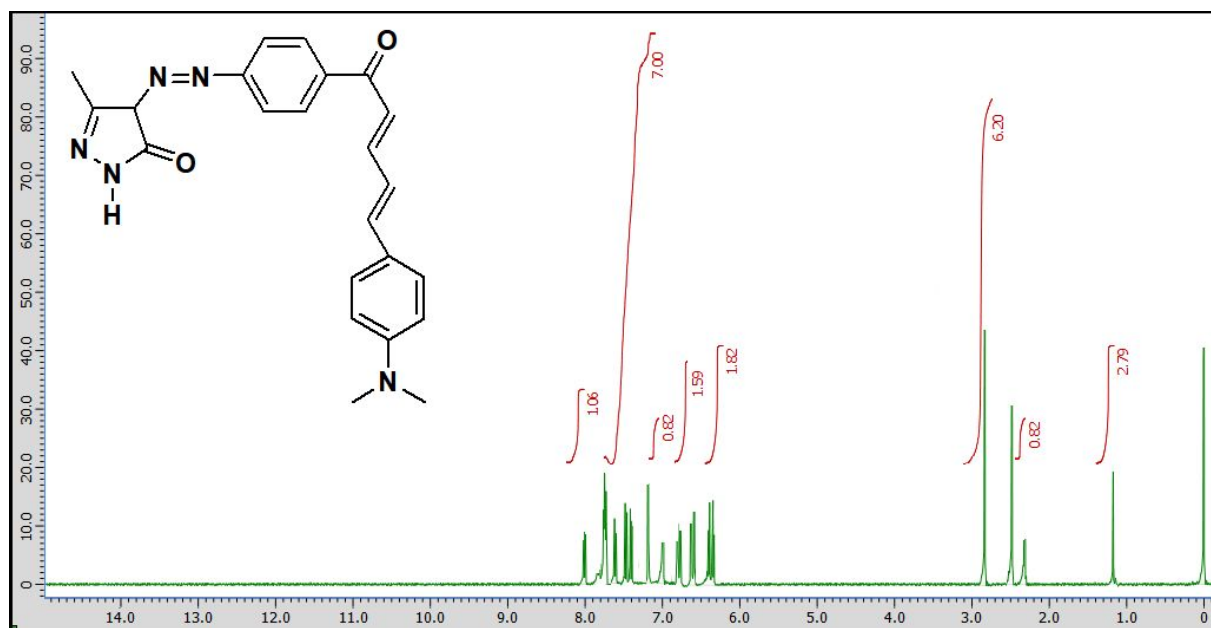

<sup>1</sup>H-NMR of compound 9a

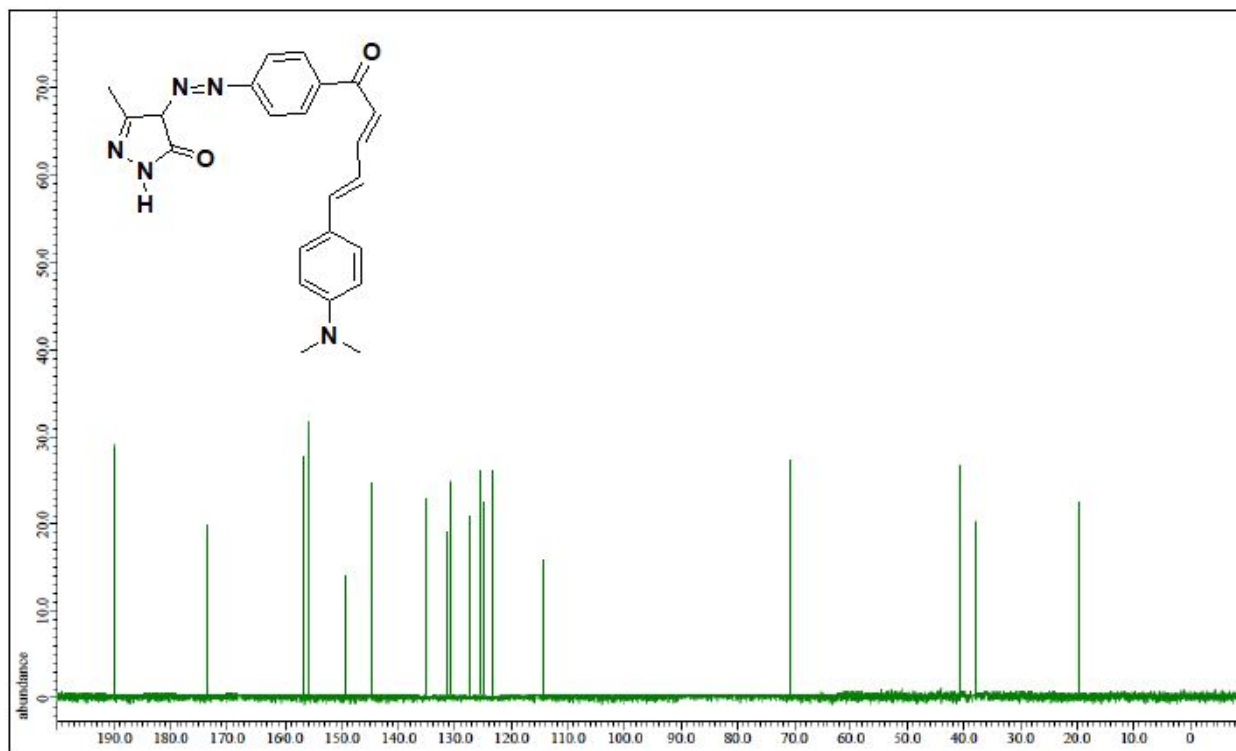

<sup>13</sup>C-NMR of compound 9a

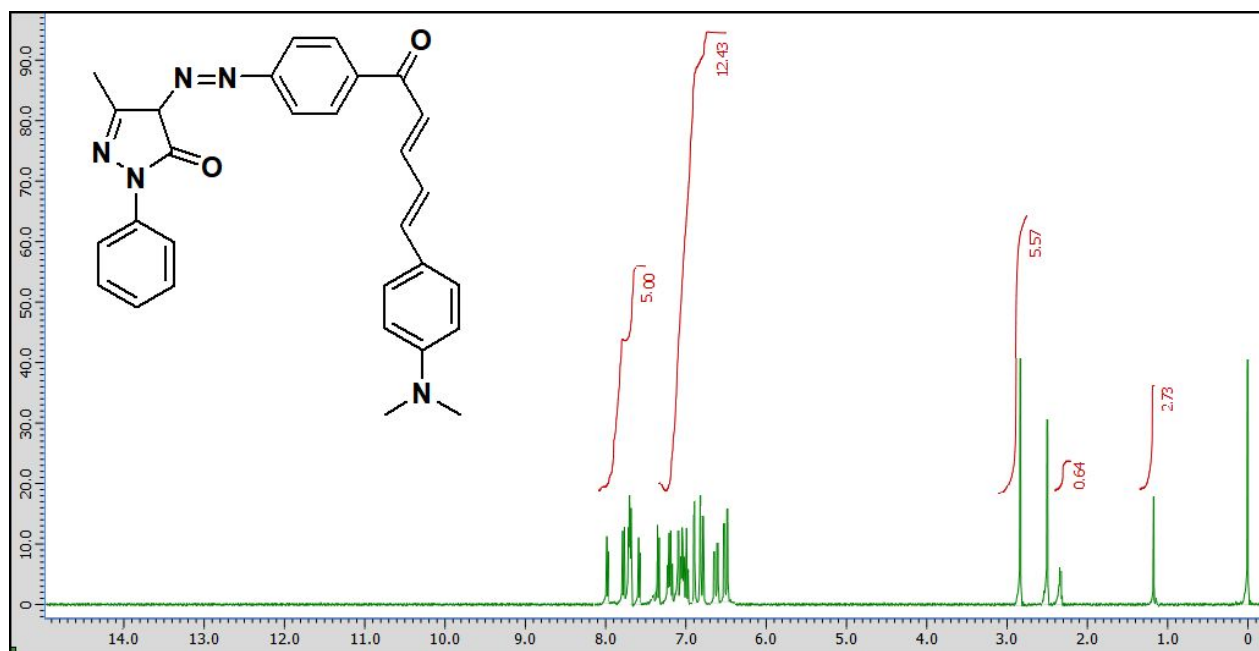

<sup>1</sup>H-NMR of compound 9b

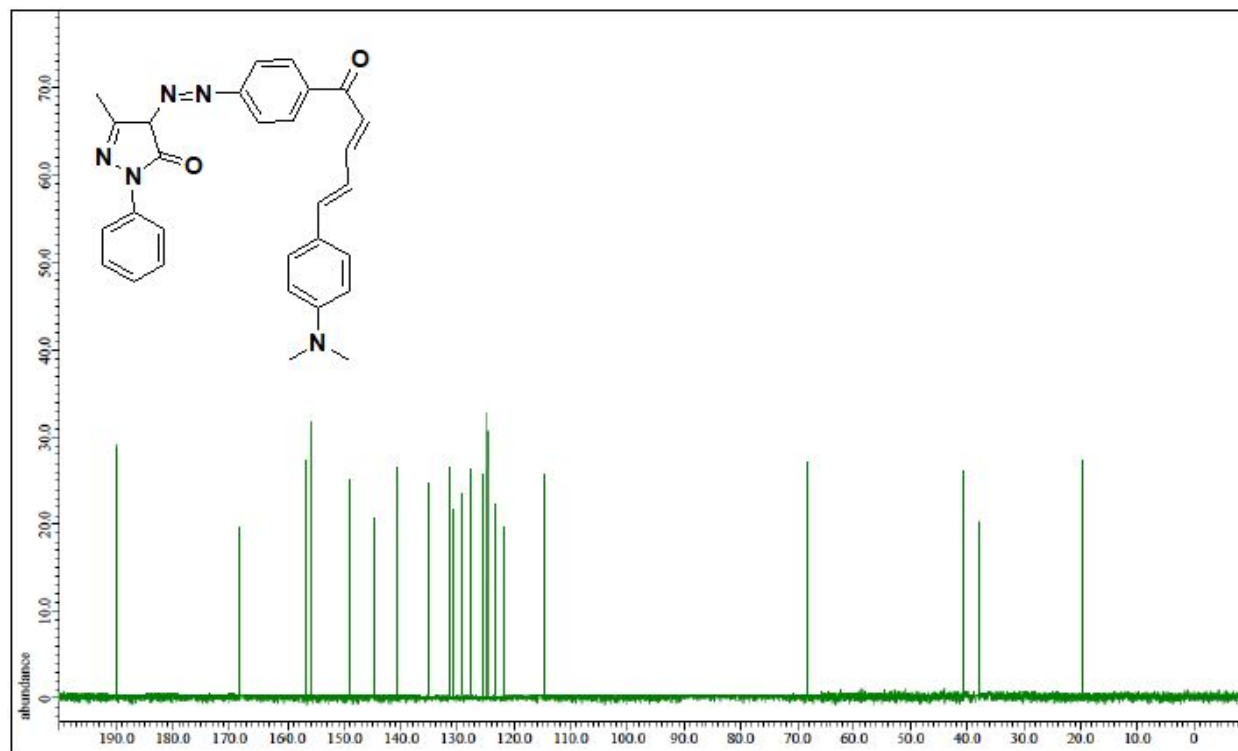

<sup>13</sup>C-NMR of compound 9b

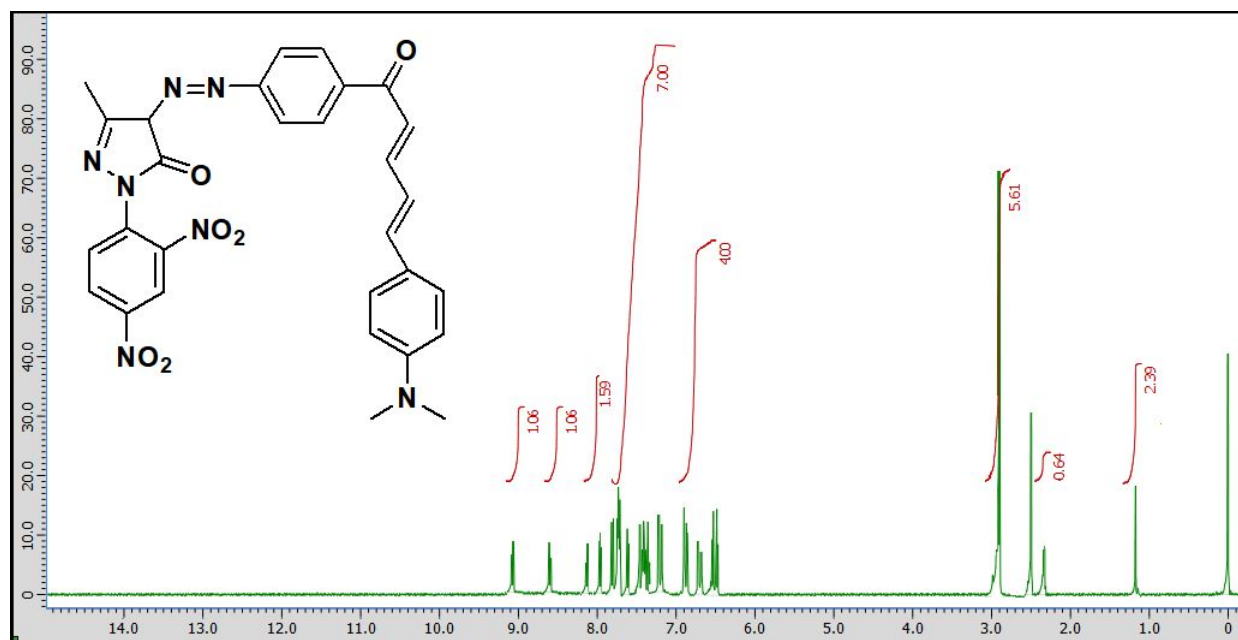

<sup>1</sup>H-NMR of compound 9c

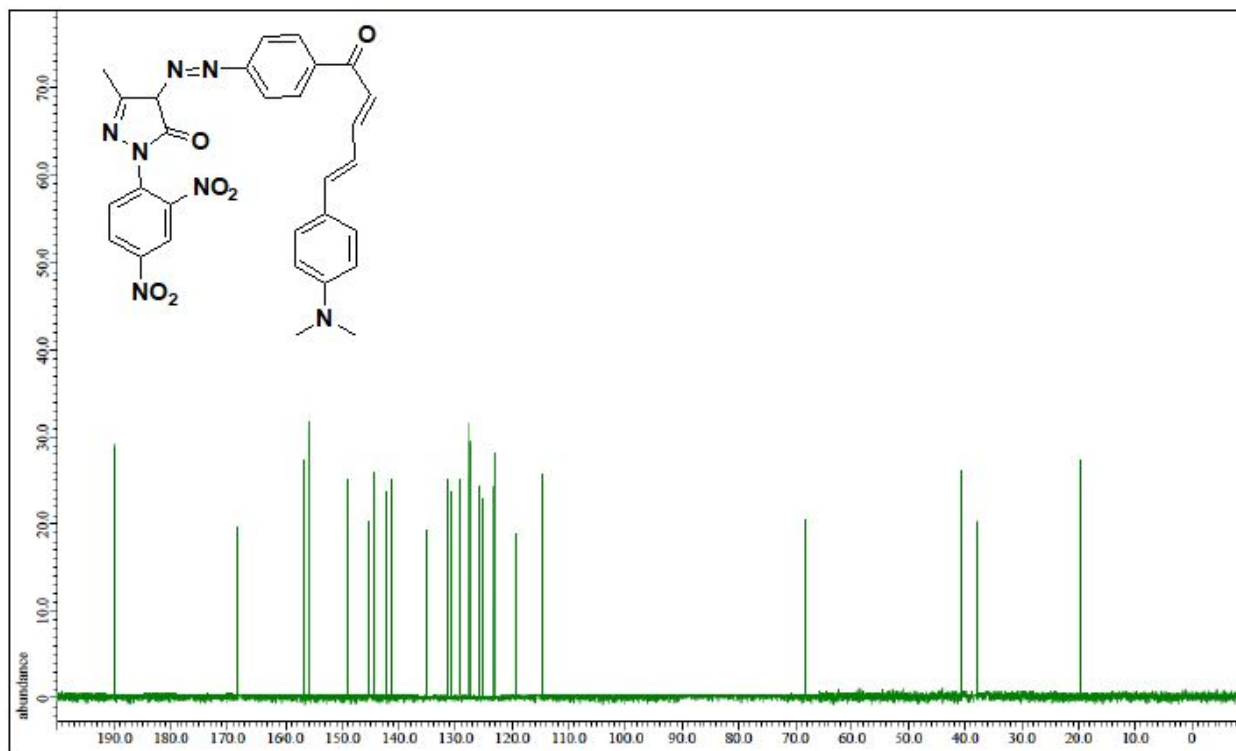

<sup>13</sup>C-NMR of compound 9c

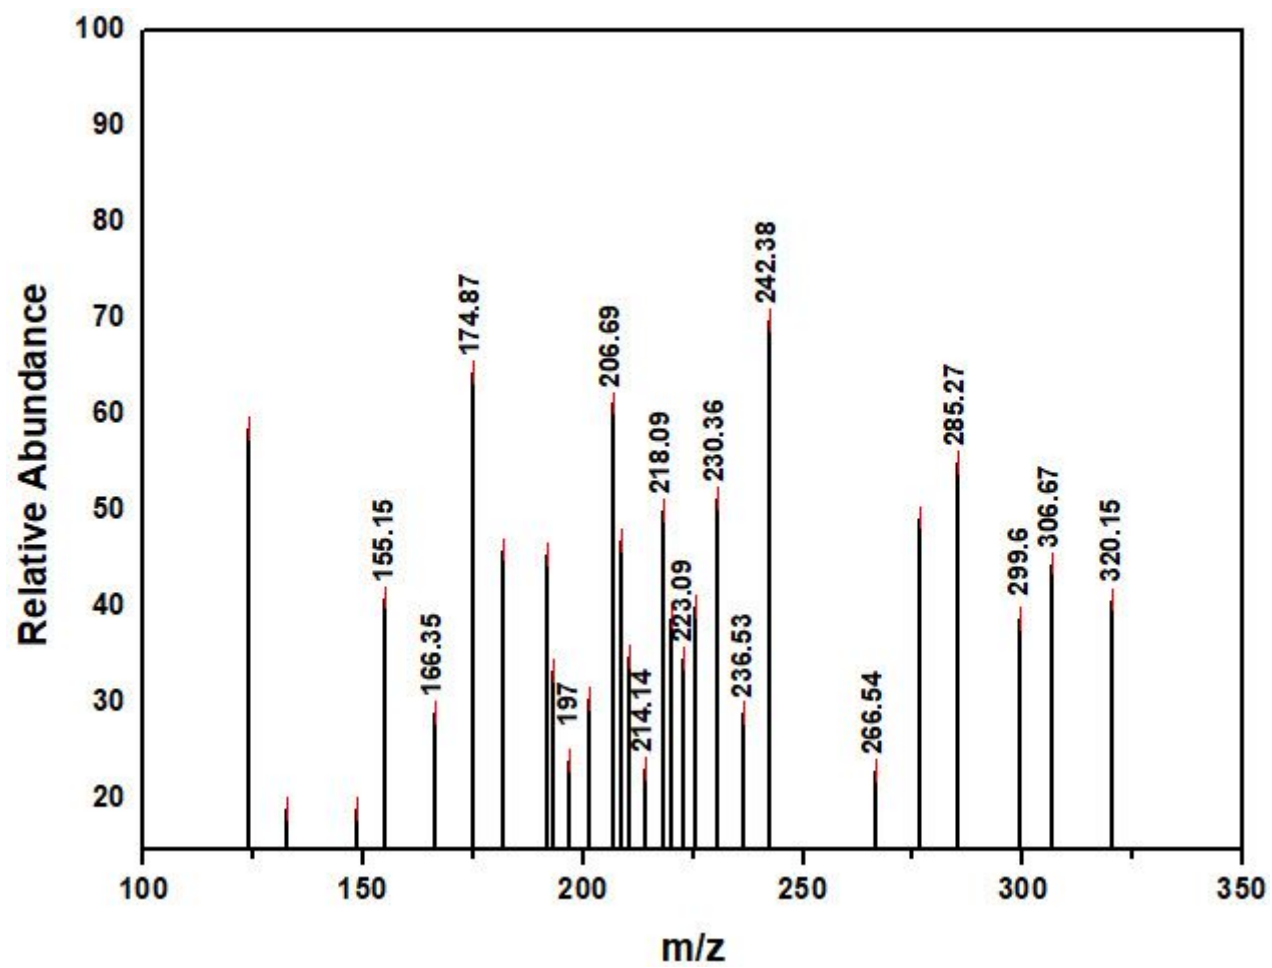

Mass spectra of compound 2b



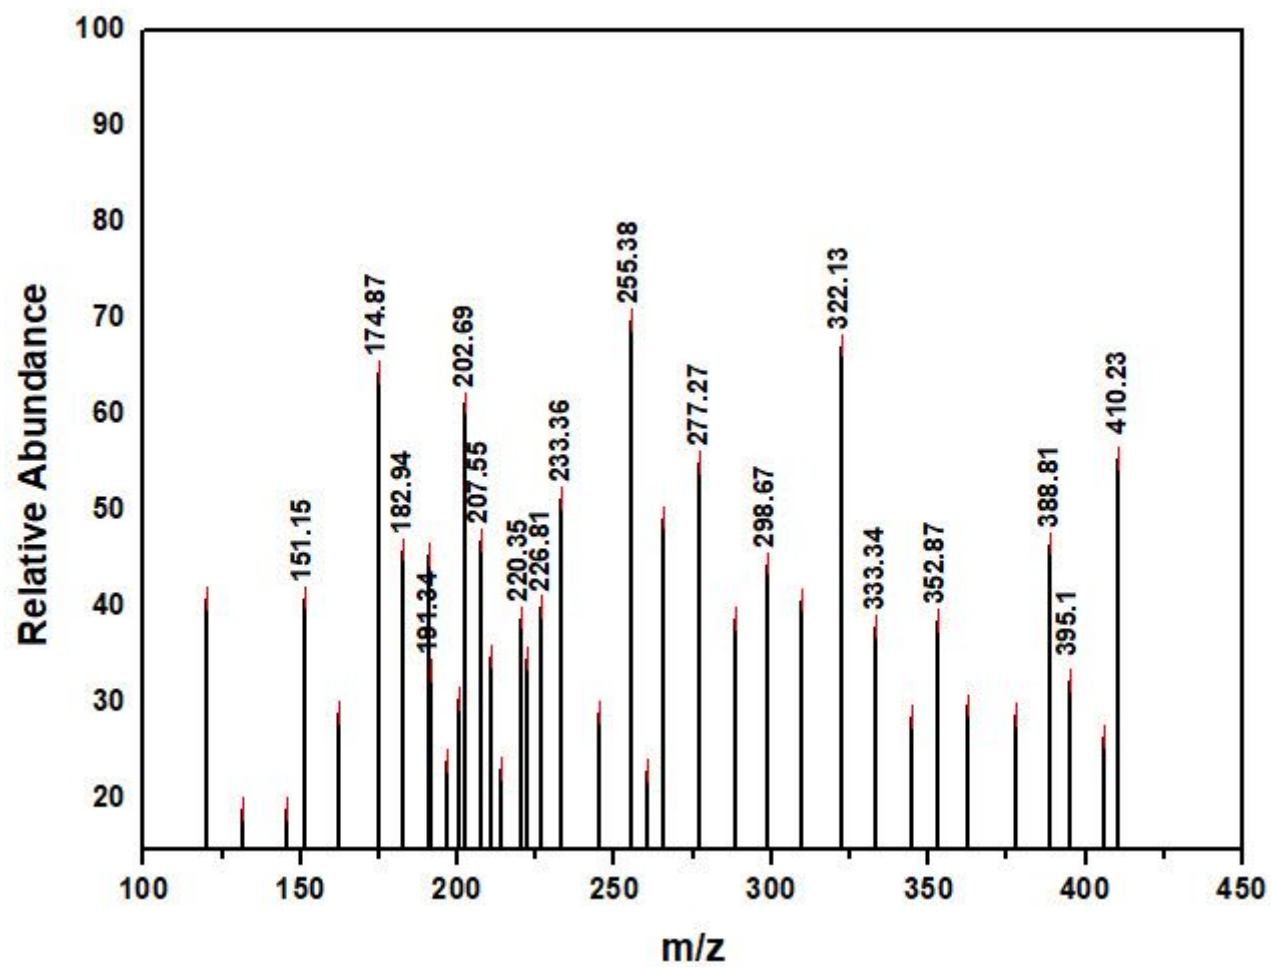

Mass spectra of compound 2c

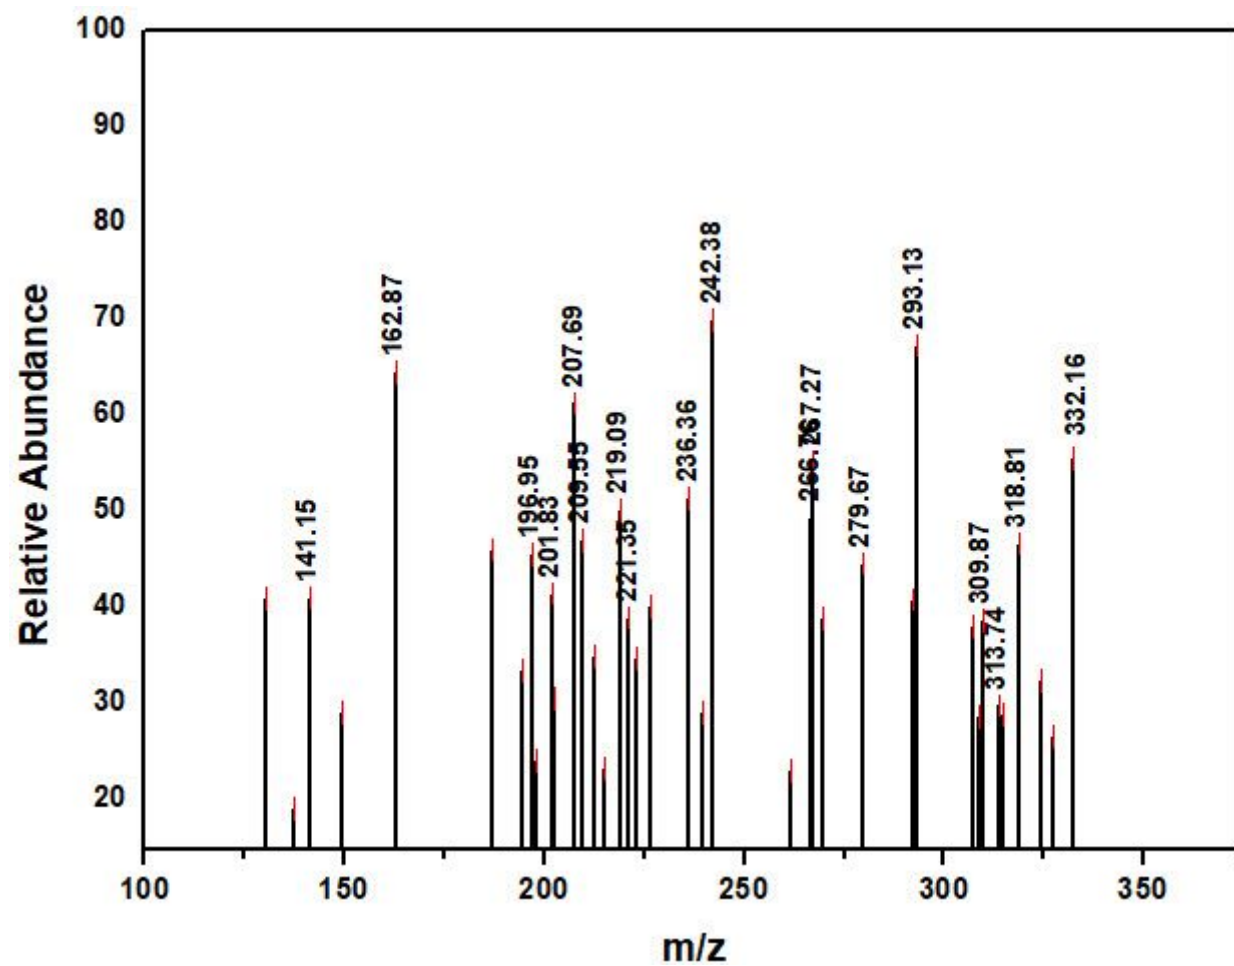

Mass spectra of compound 3a

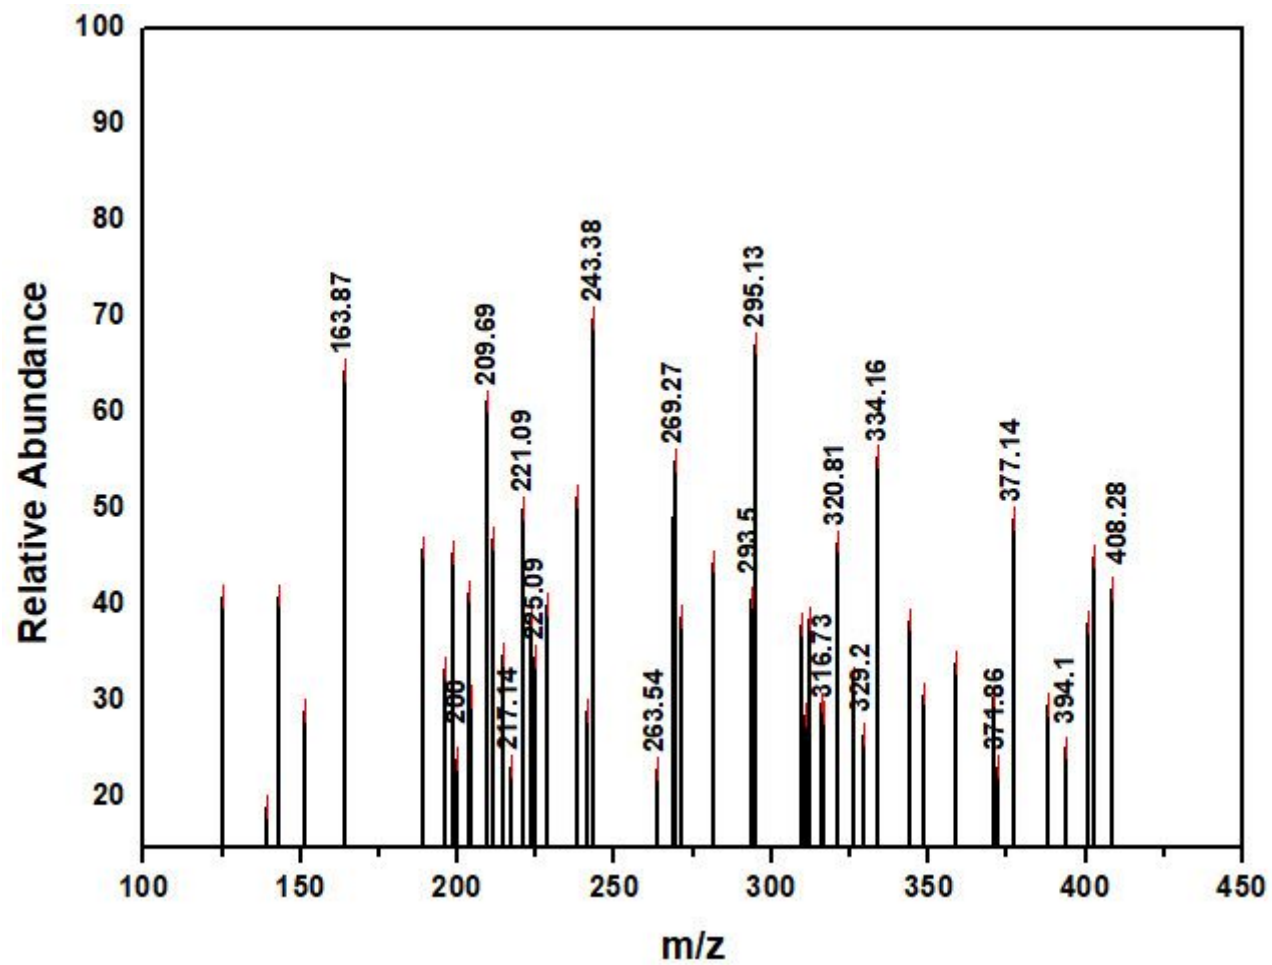

Mass spectra of compound 3b

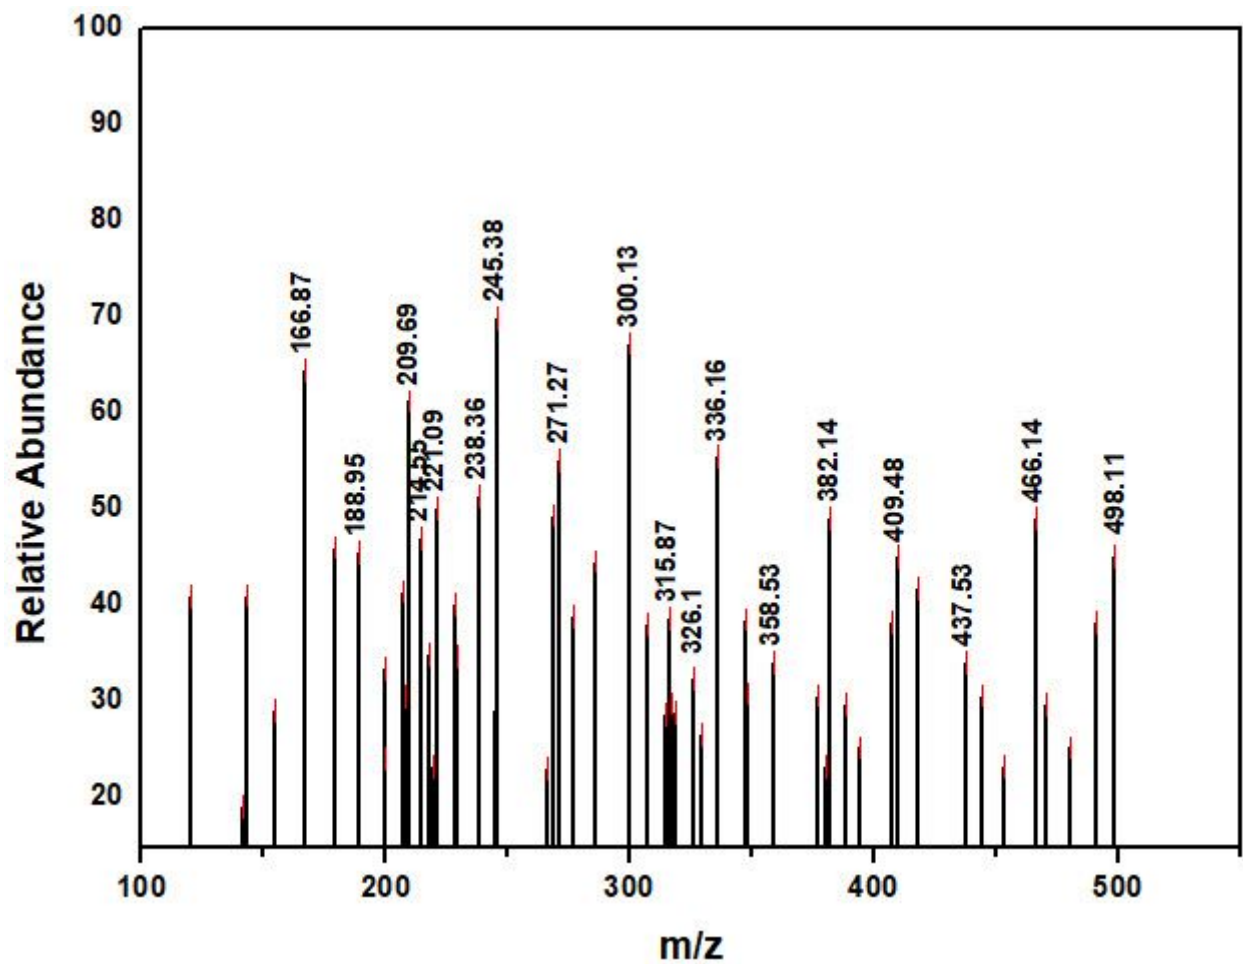

Mass spectra of compound 3c

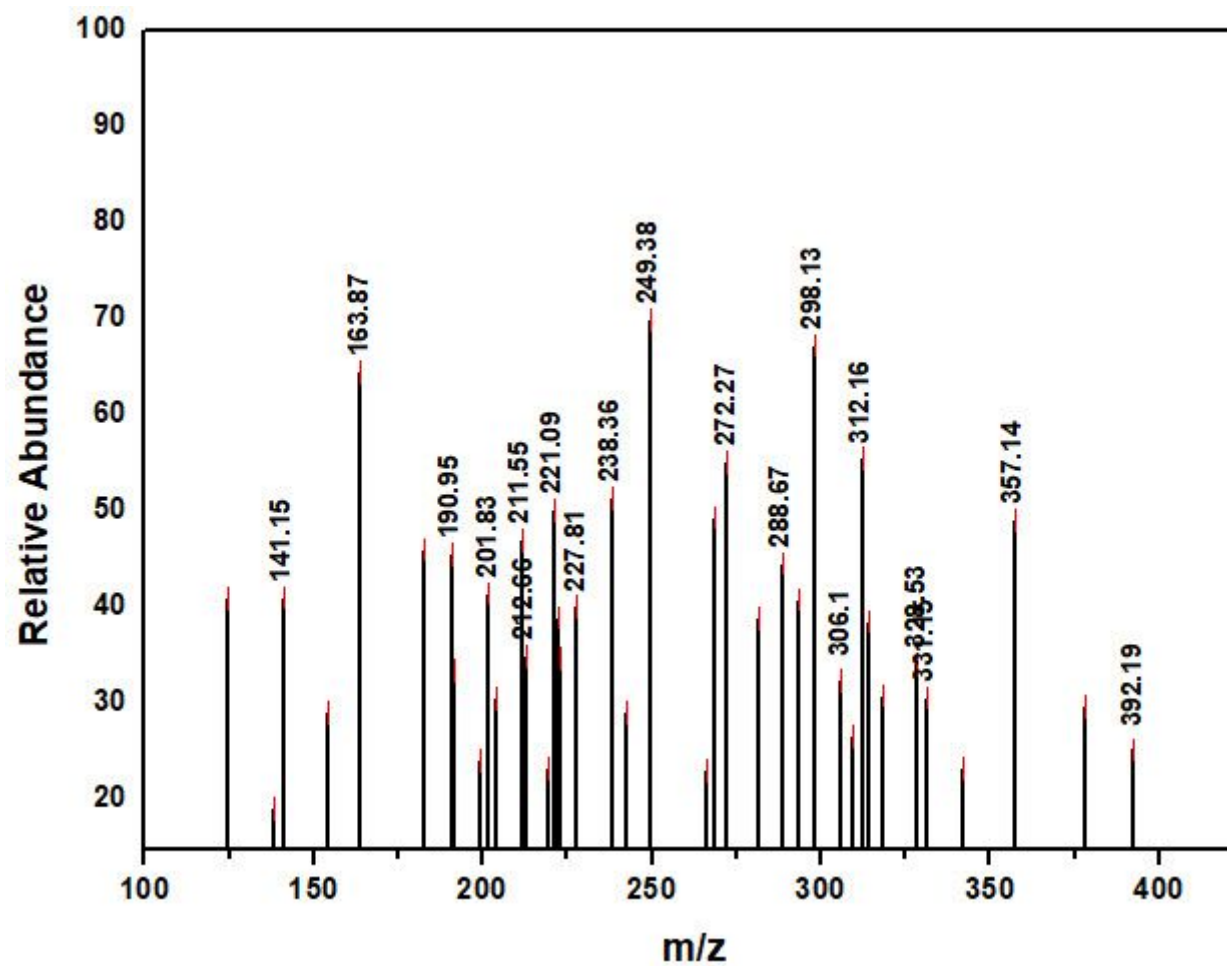

Mass spectra of compound 4a

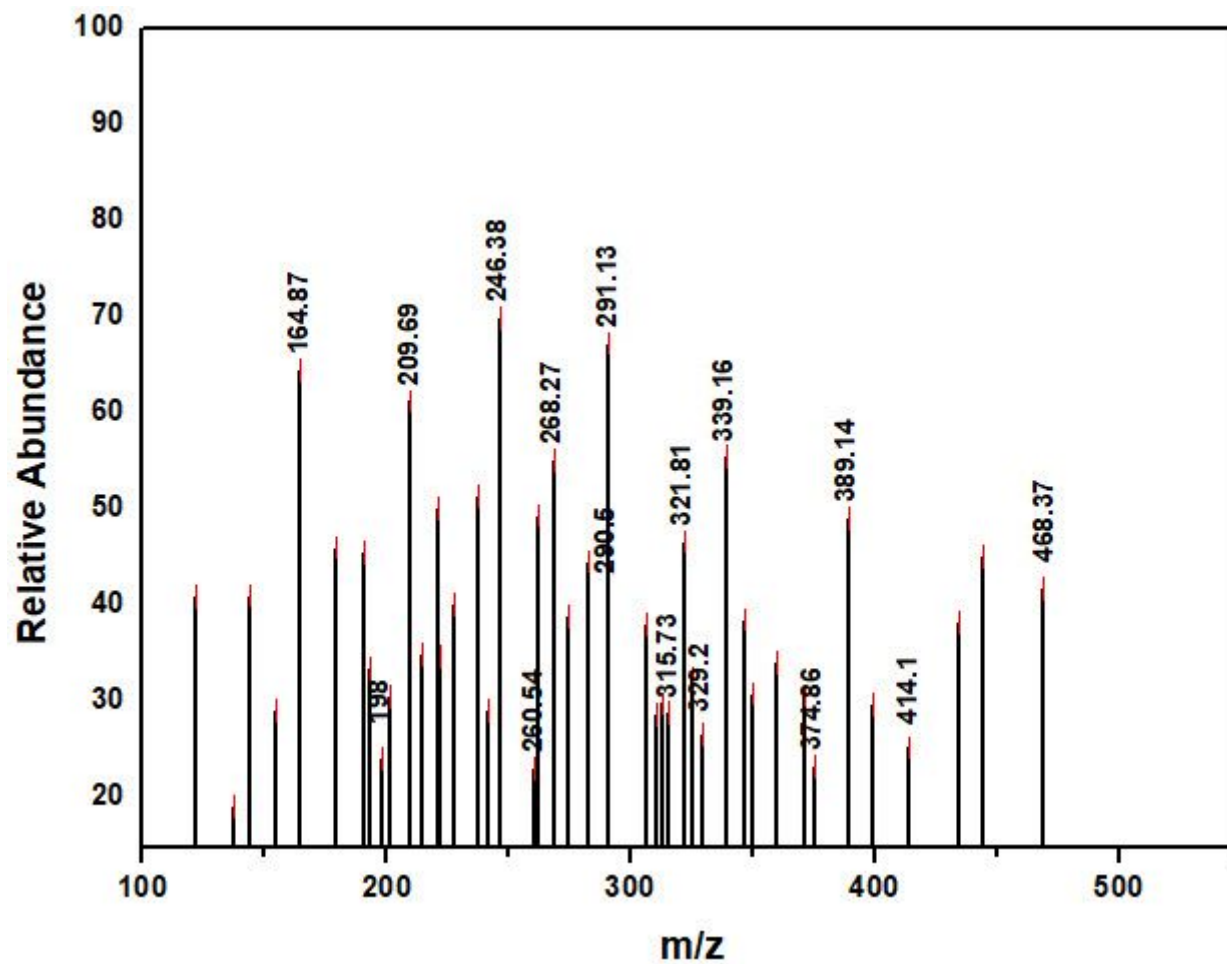

Mass spectra of compound 4b

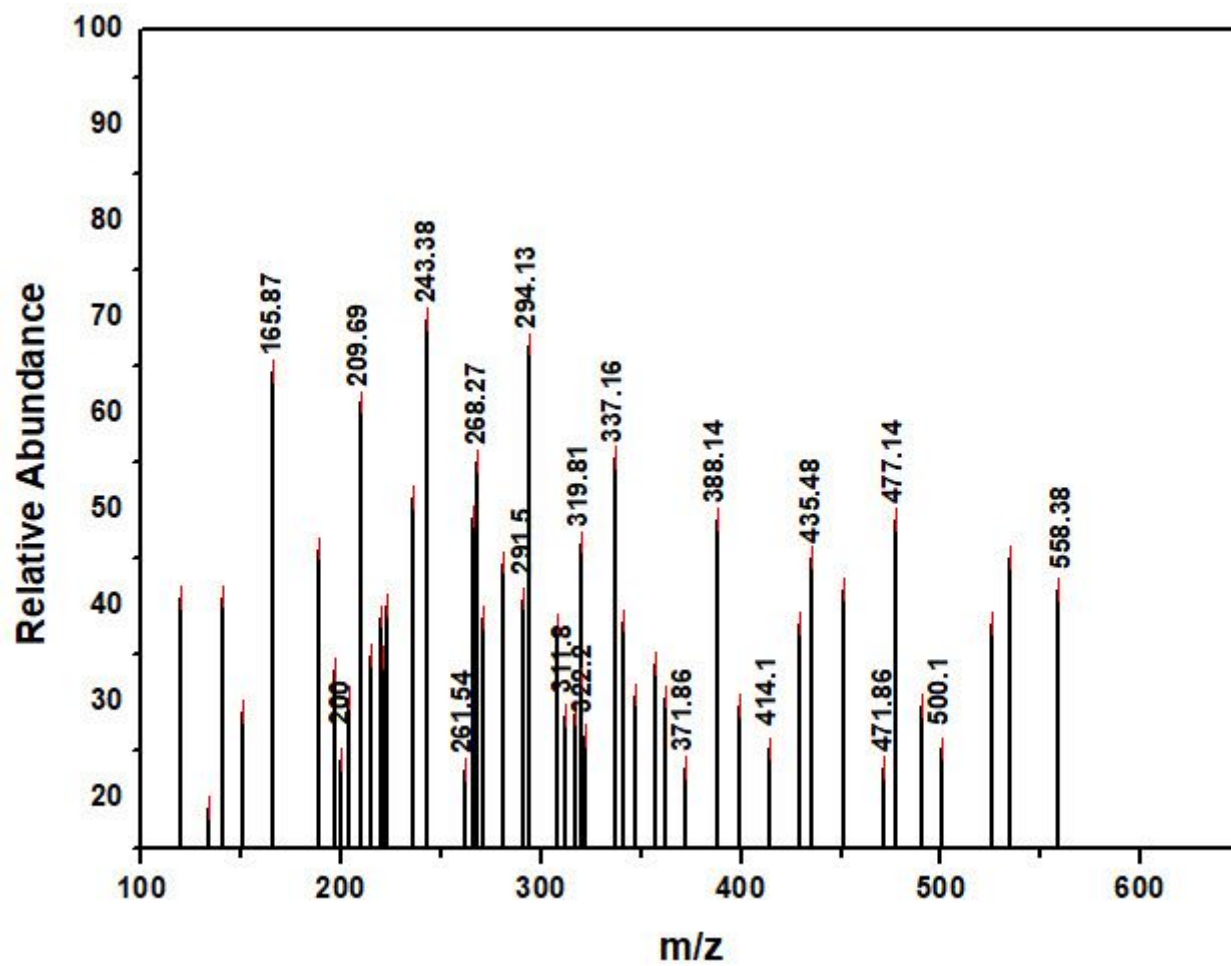

Mass spectra of compound 4c

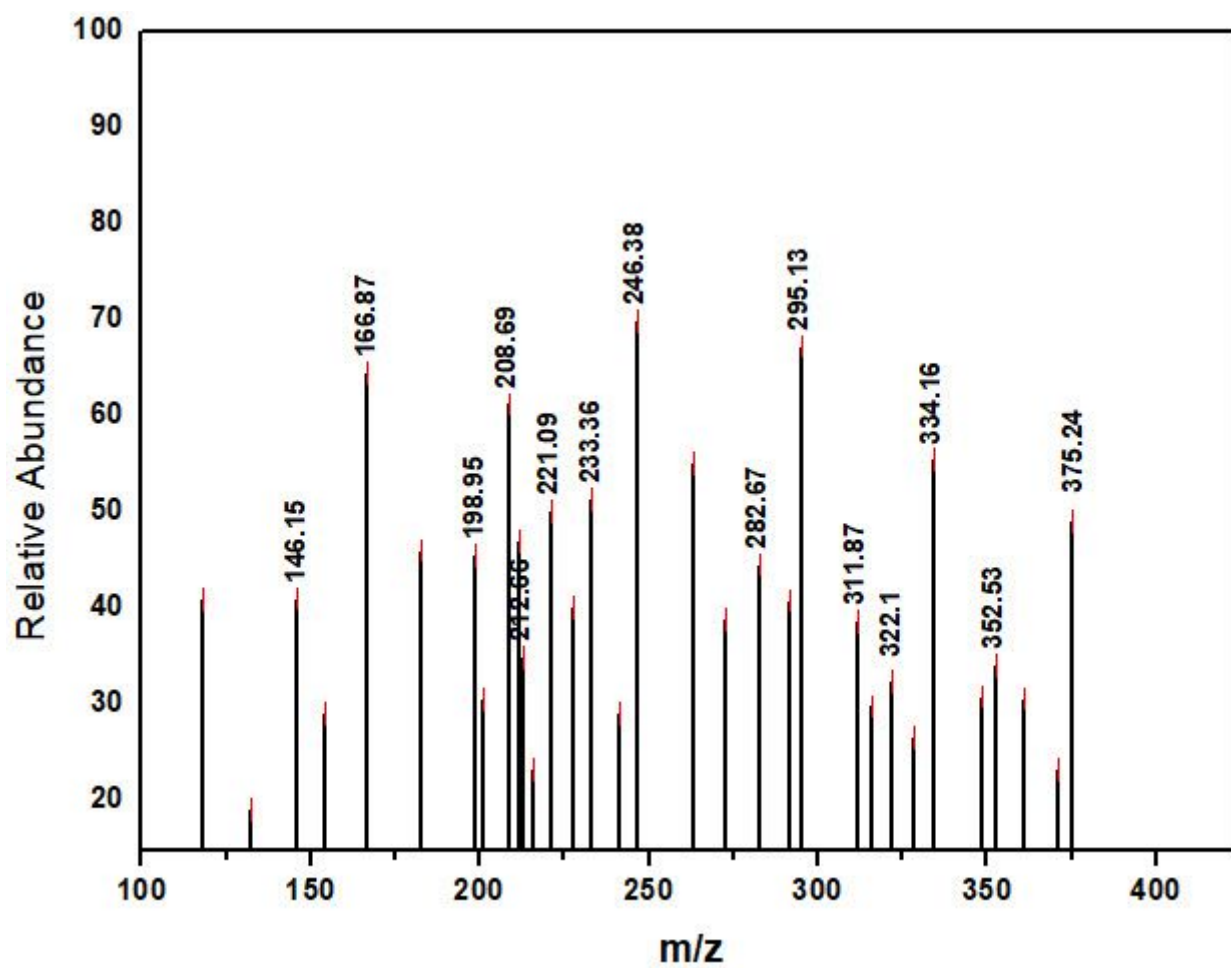

Mass spectra of compound 5a



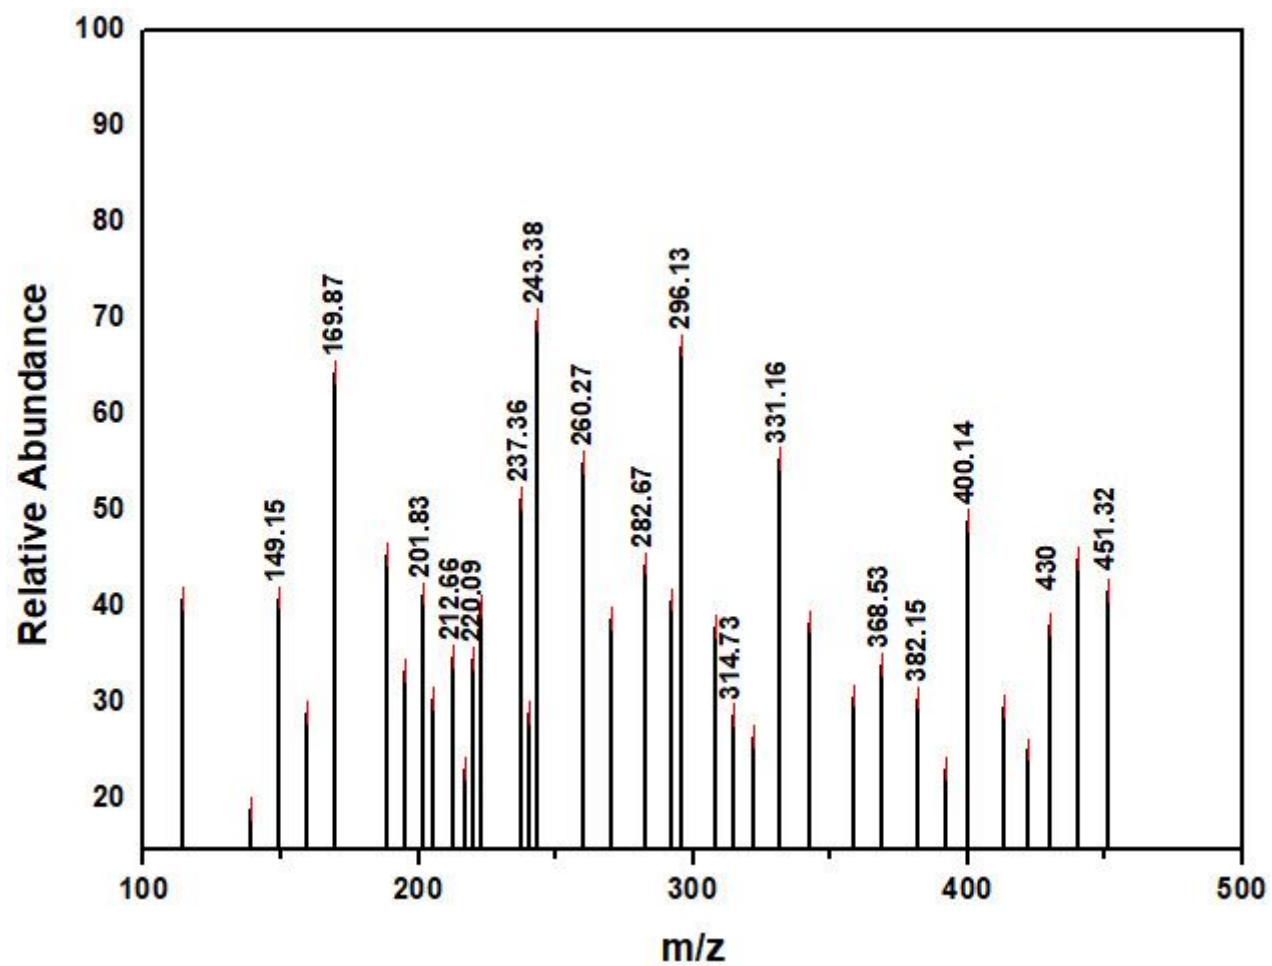

Mass spectra of compound 5b

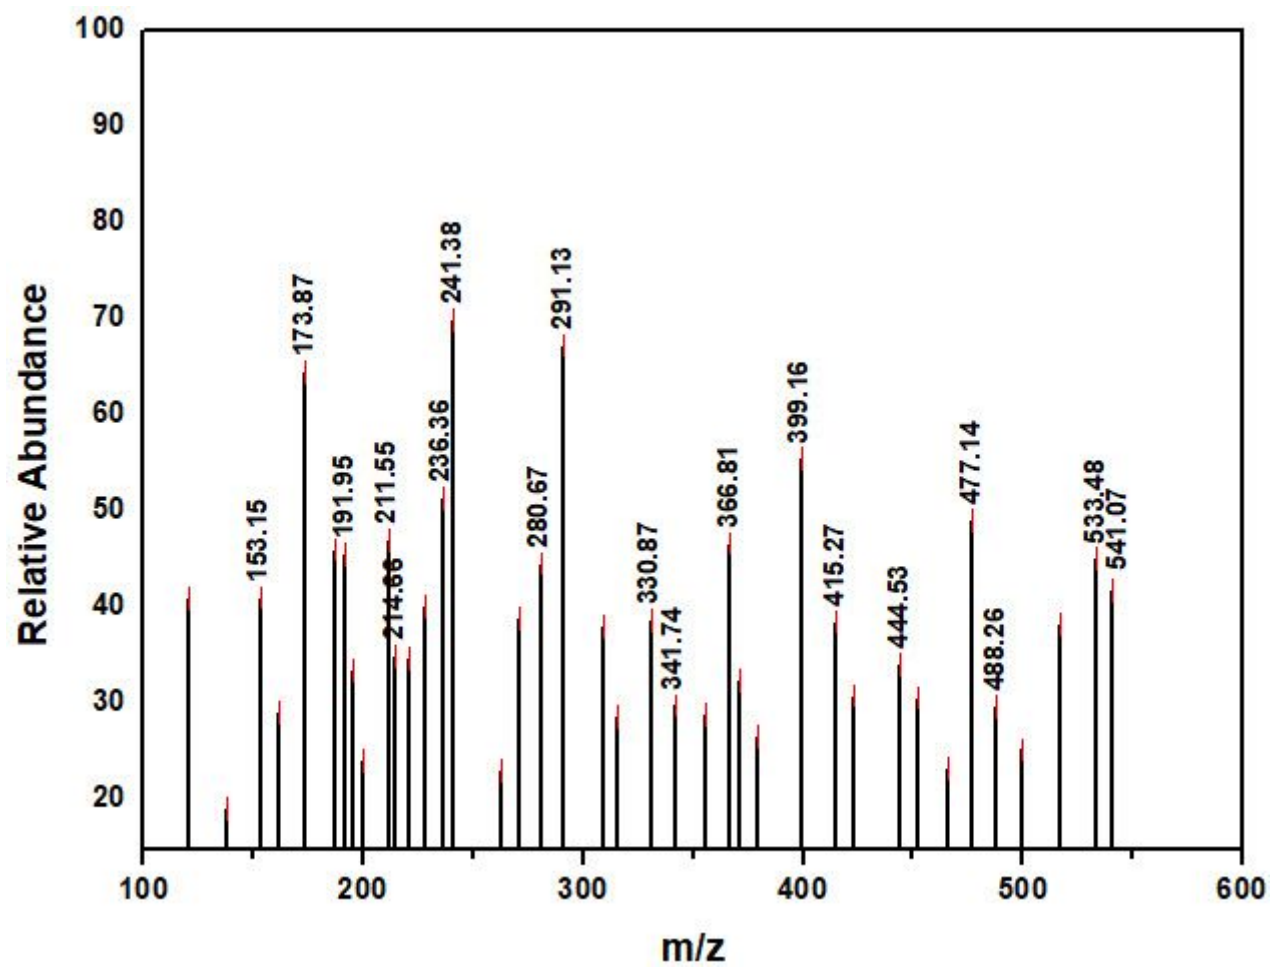

Mass spectra of compound 5c

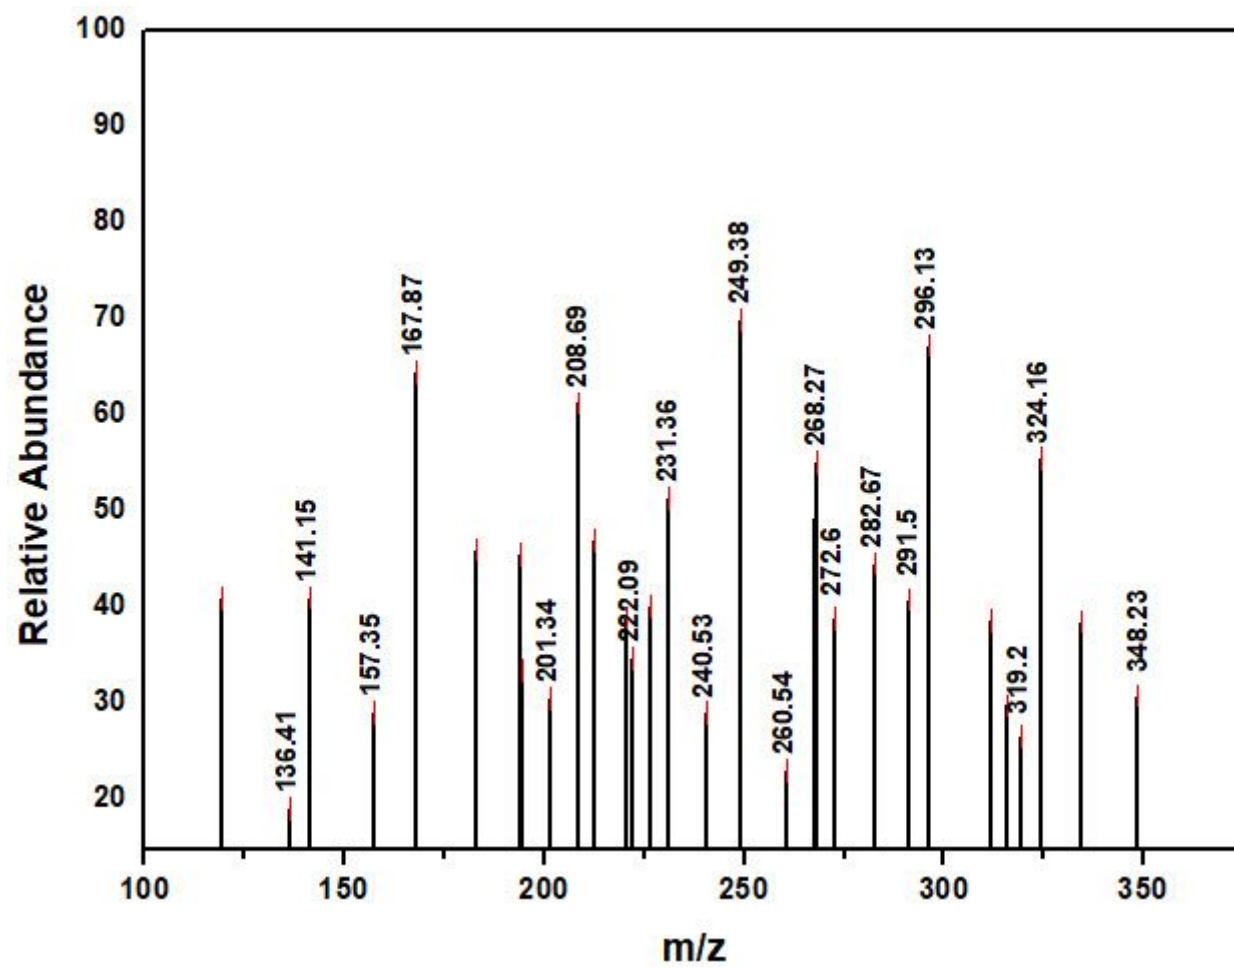

Mass spectra of compound 6a

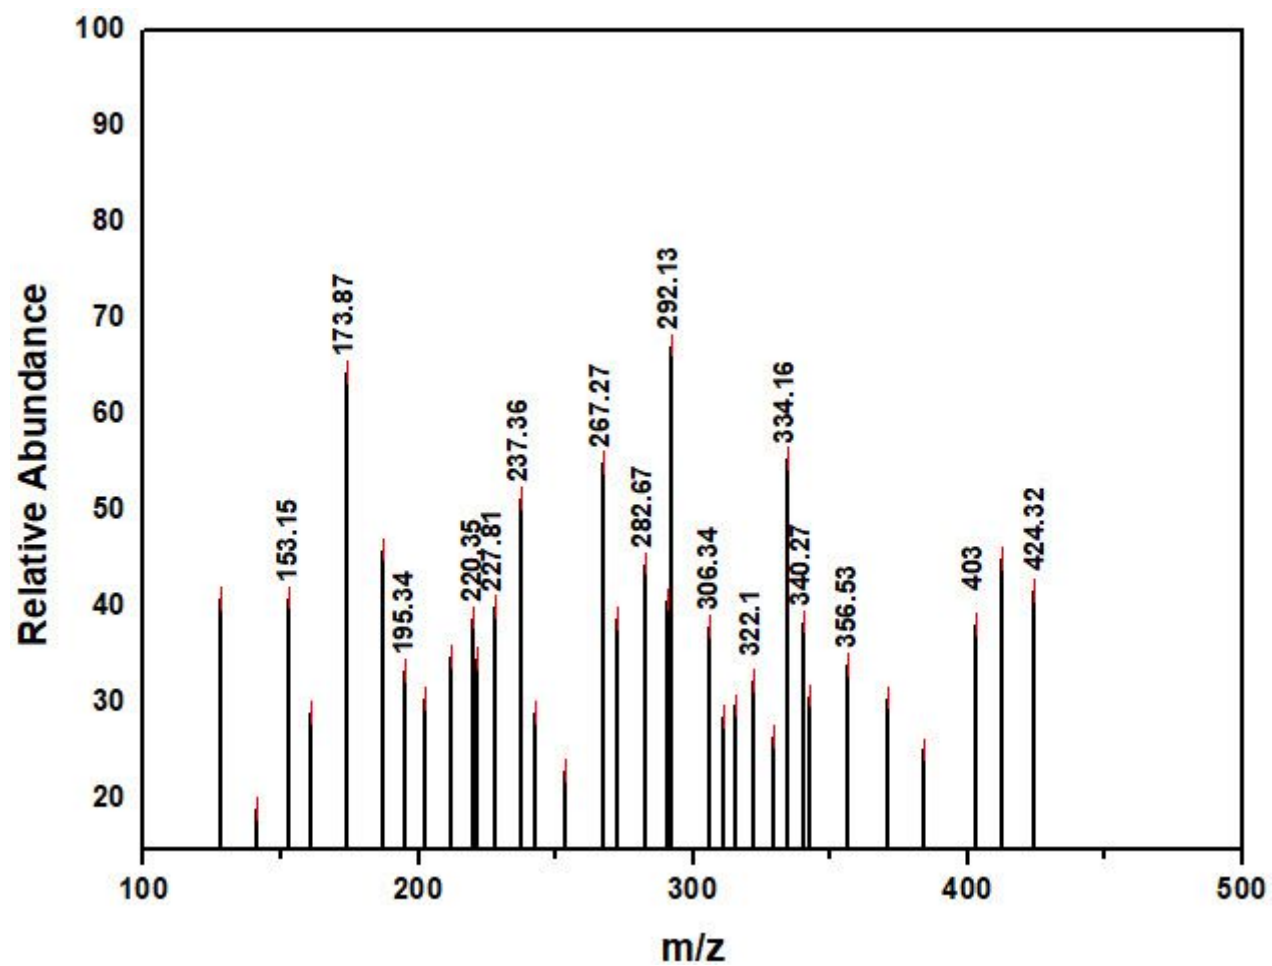

Mass spectra of compound 6b

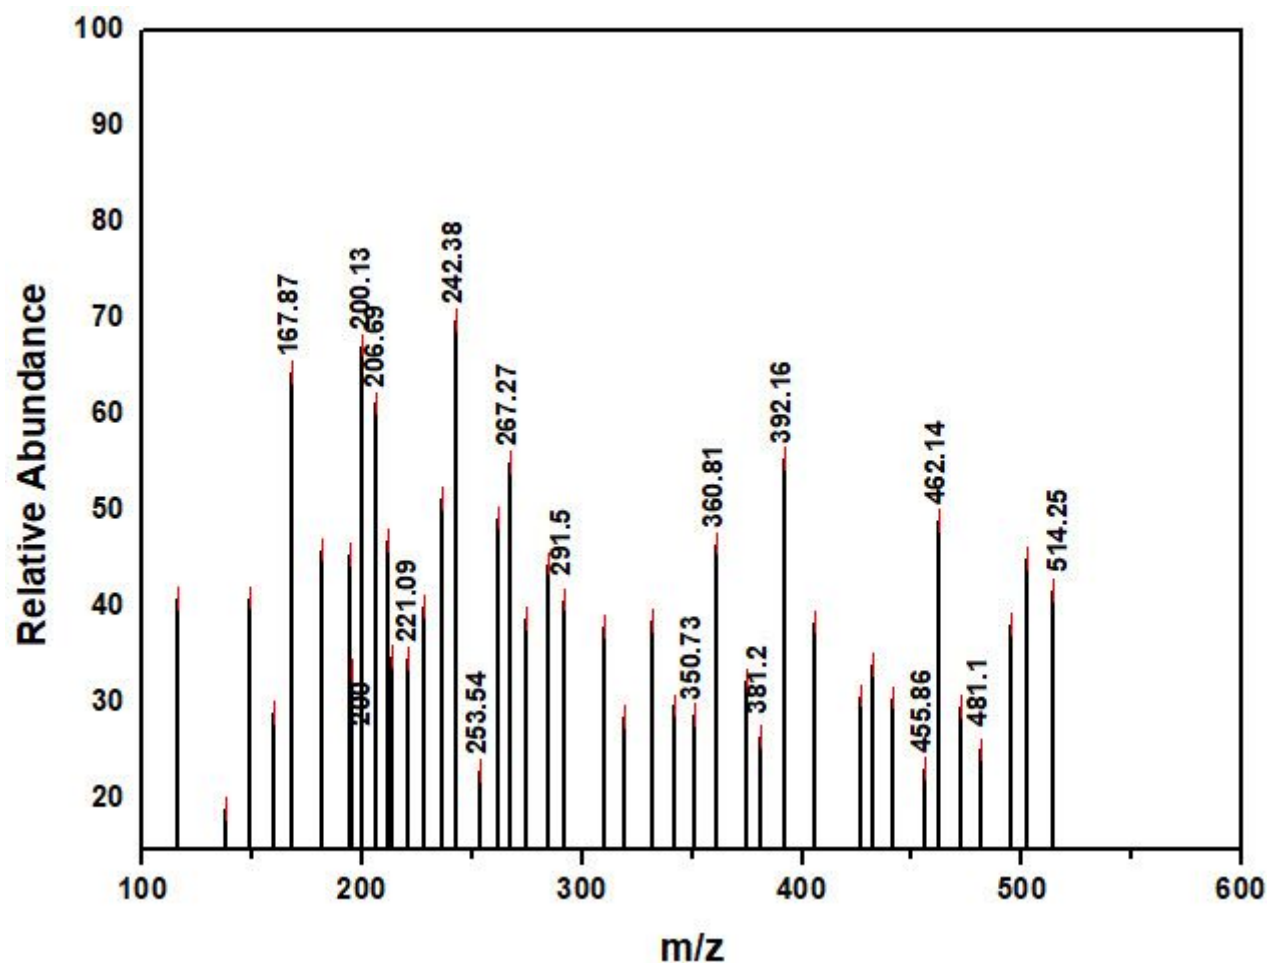

Mass spectra of compound 6c

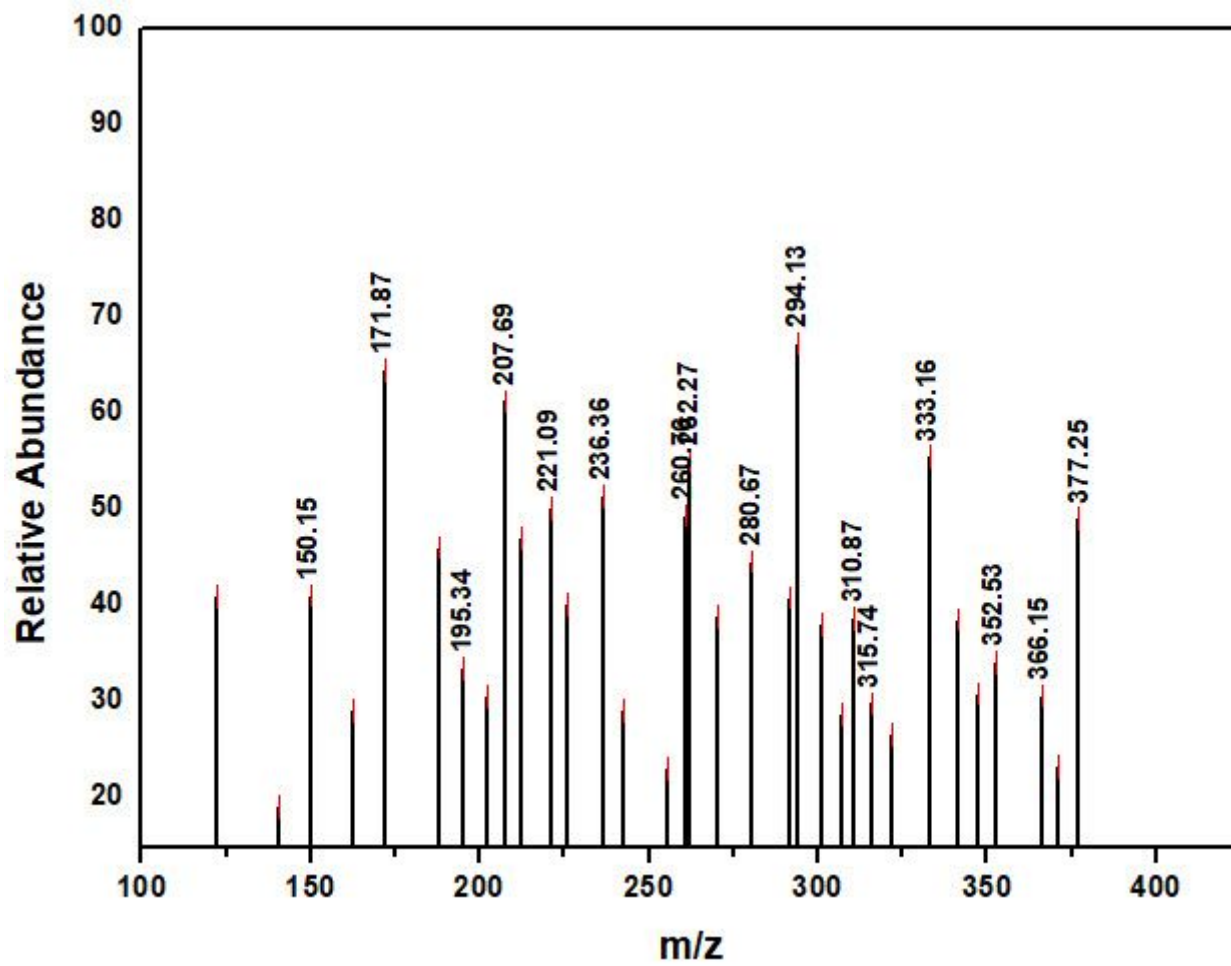

Mass spectra of compound 7a

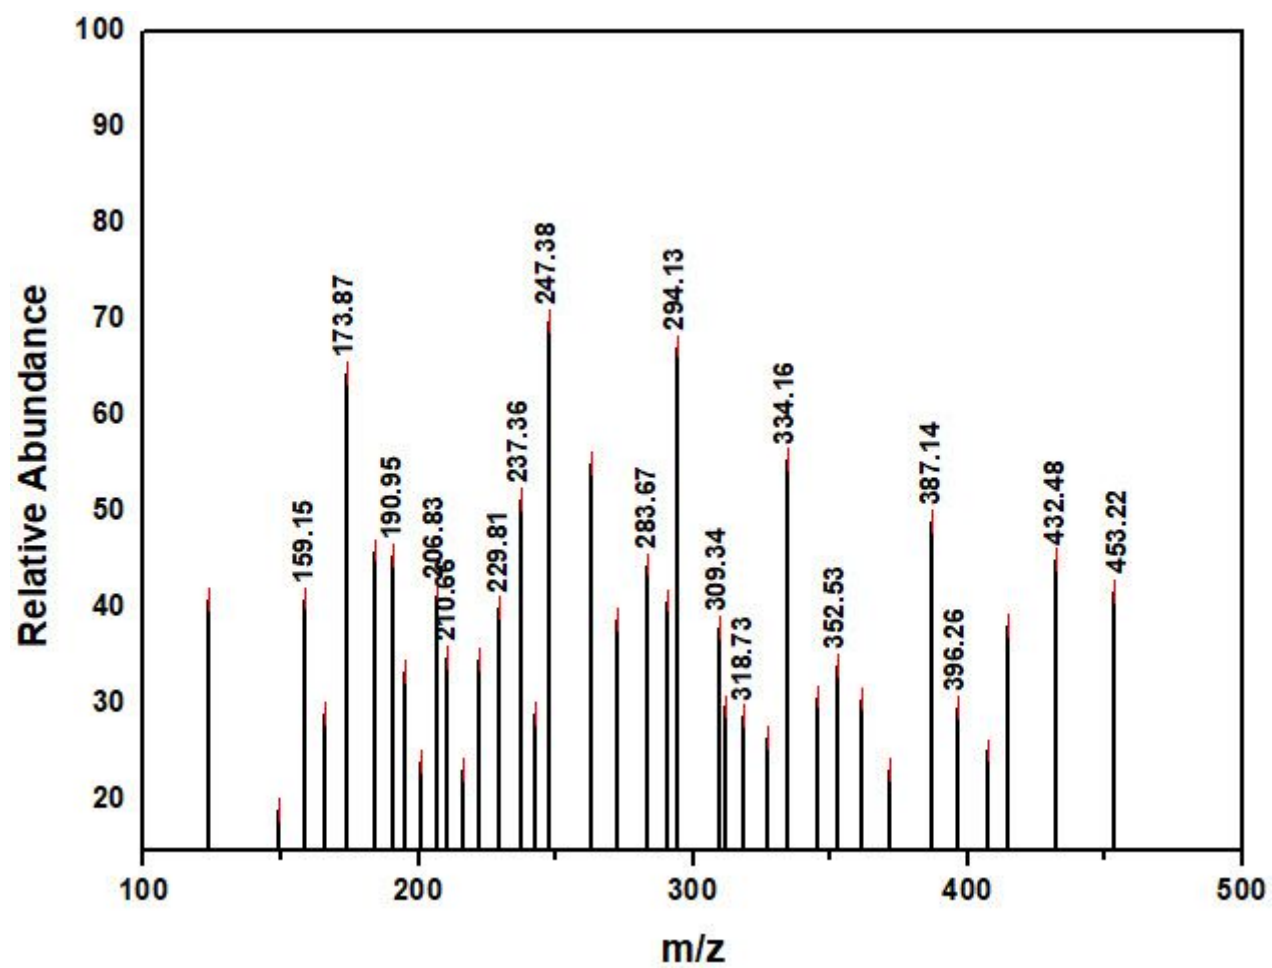

Mass spectra of compound 7b

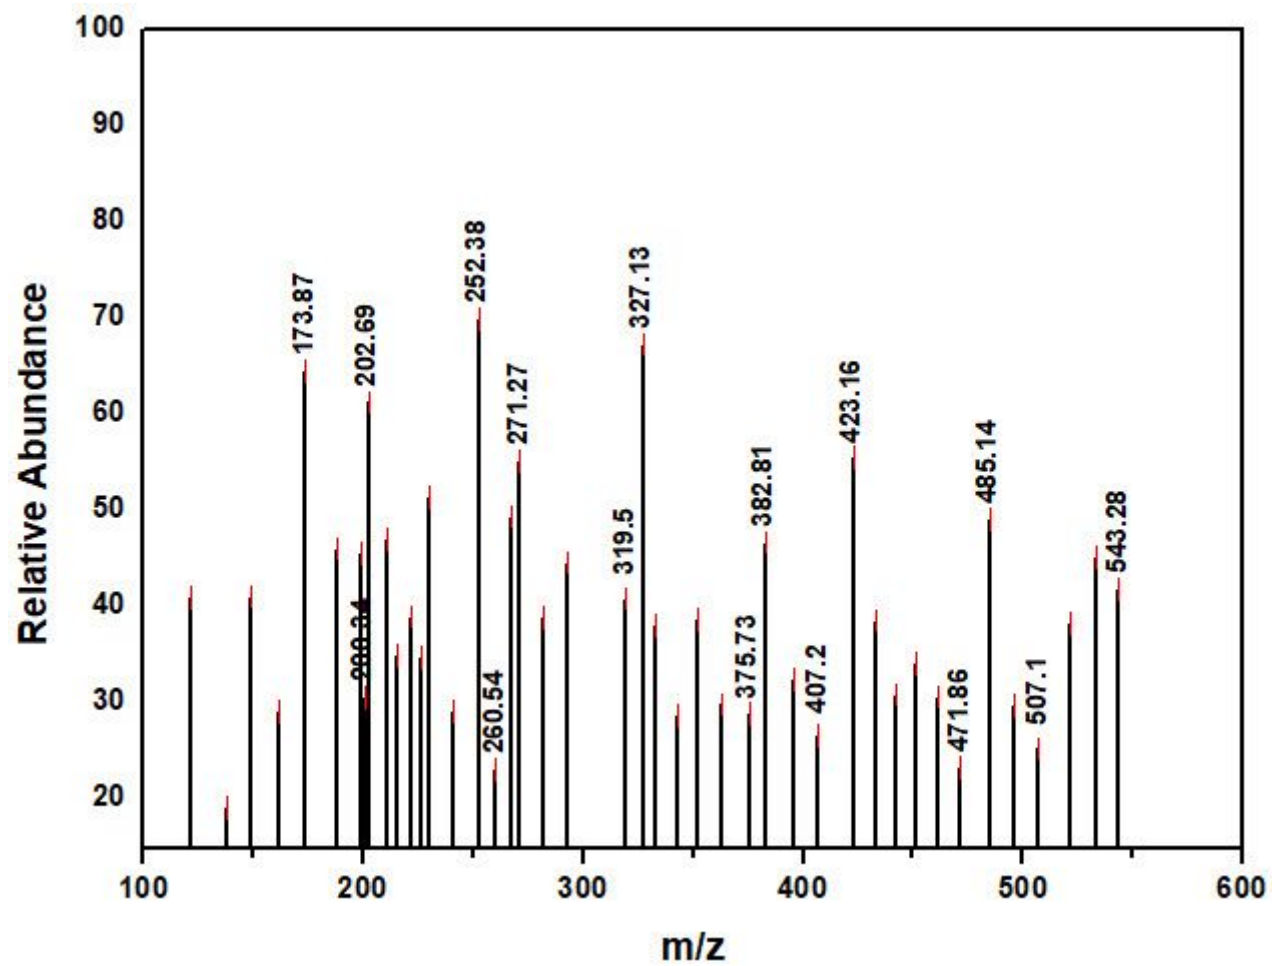

Mass spectra of compound 7c



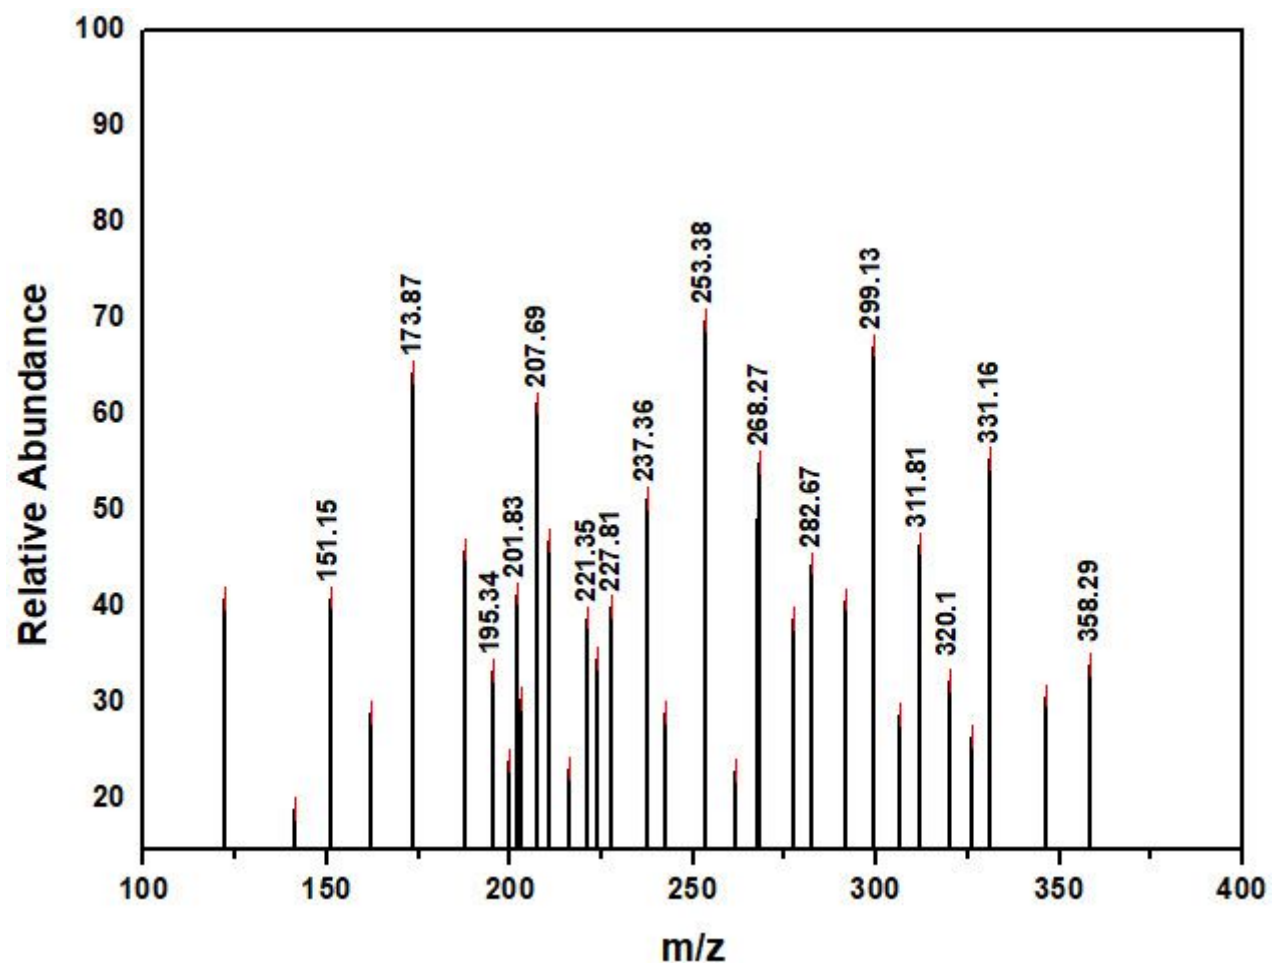

Mass spectra of compound 8a

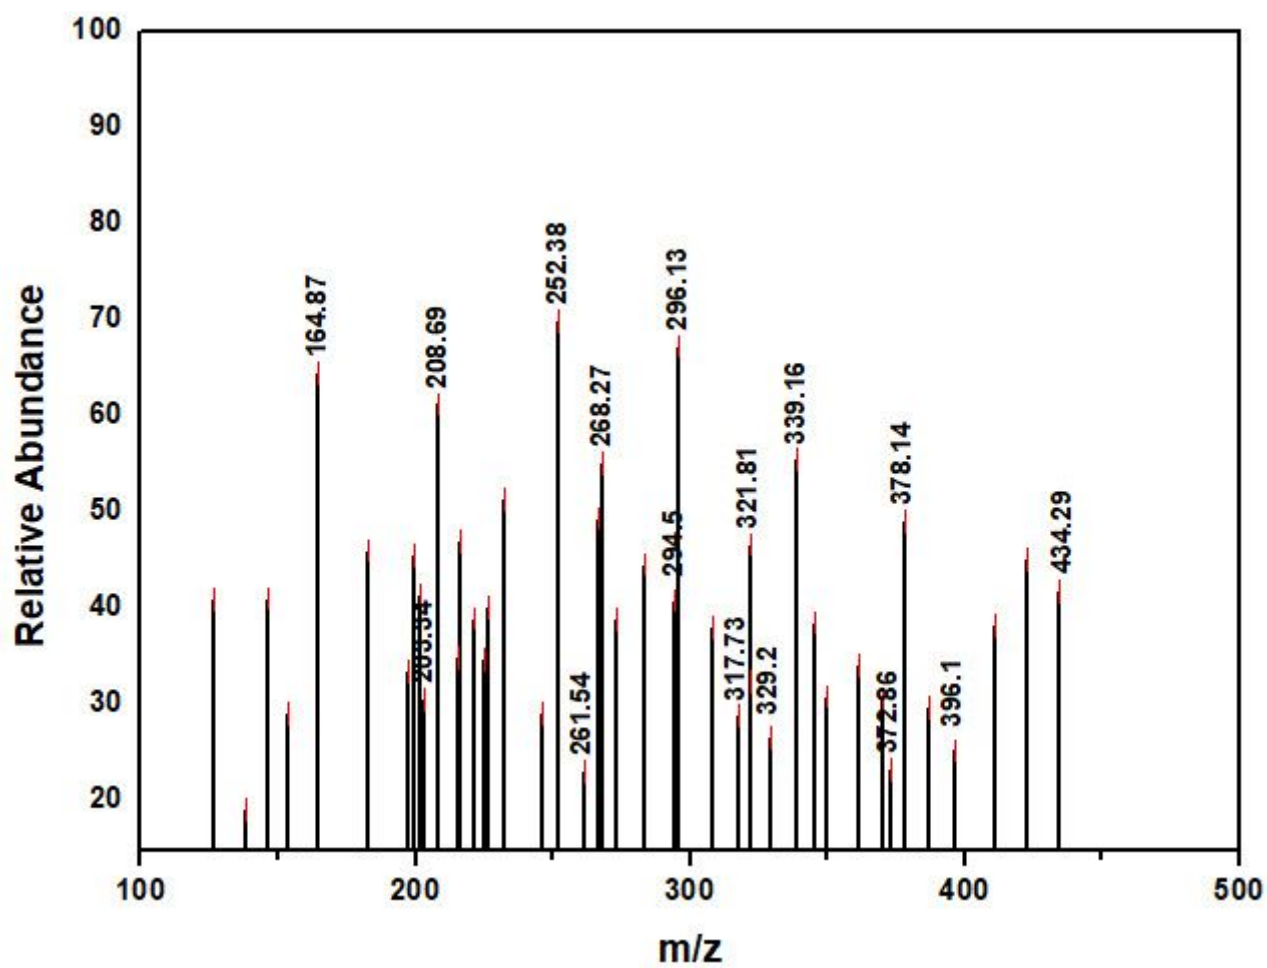

Mass spectra of compound 8b

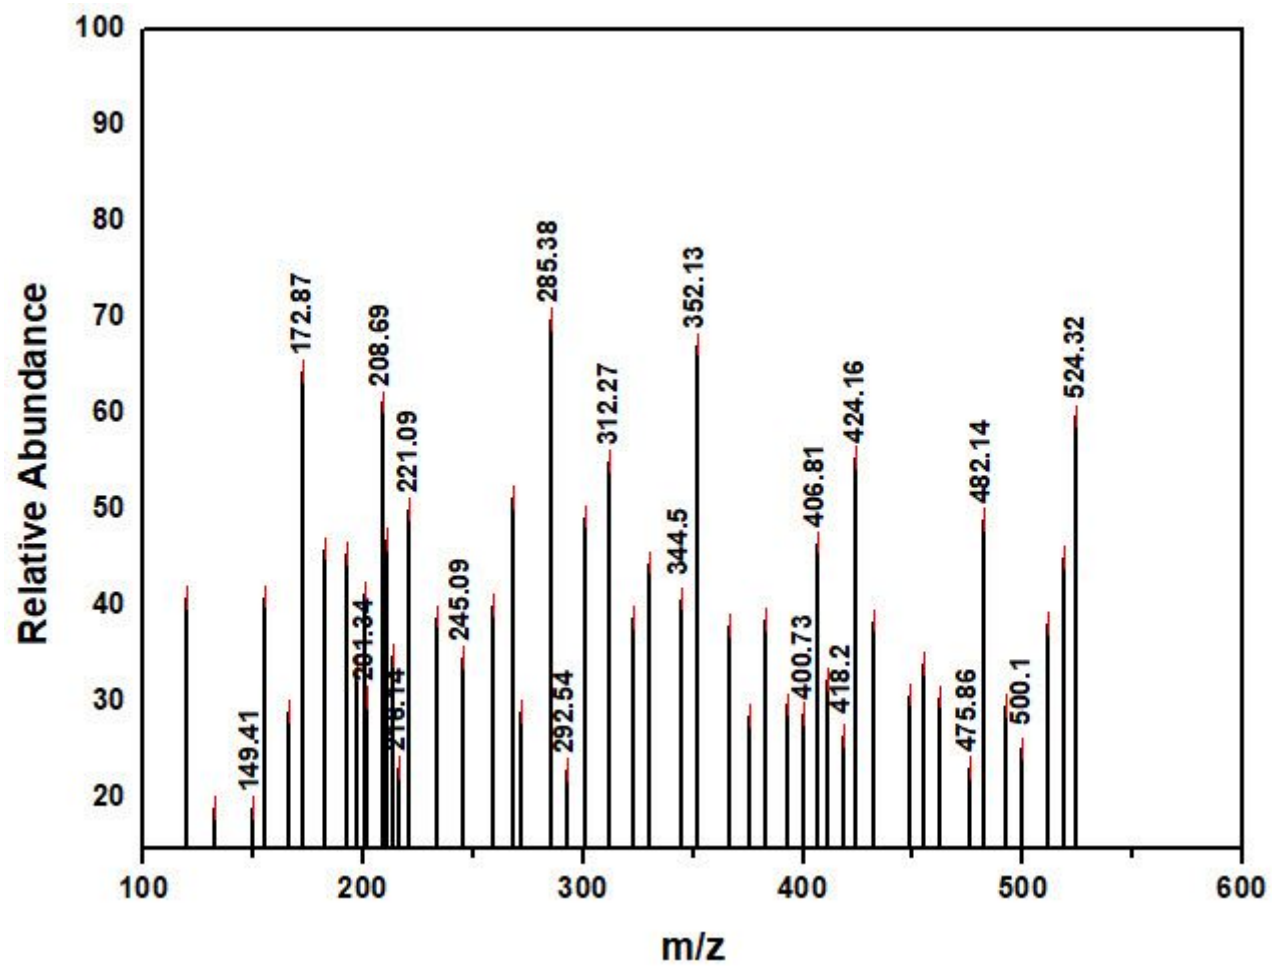

Mass spectra of compound 8c

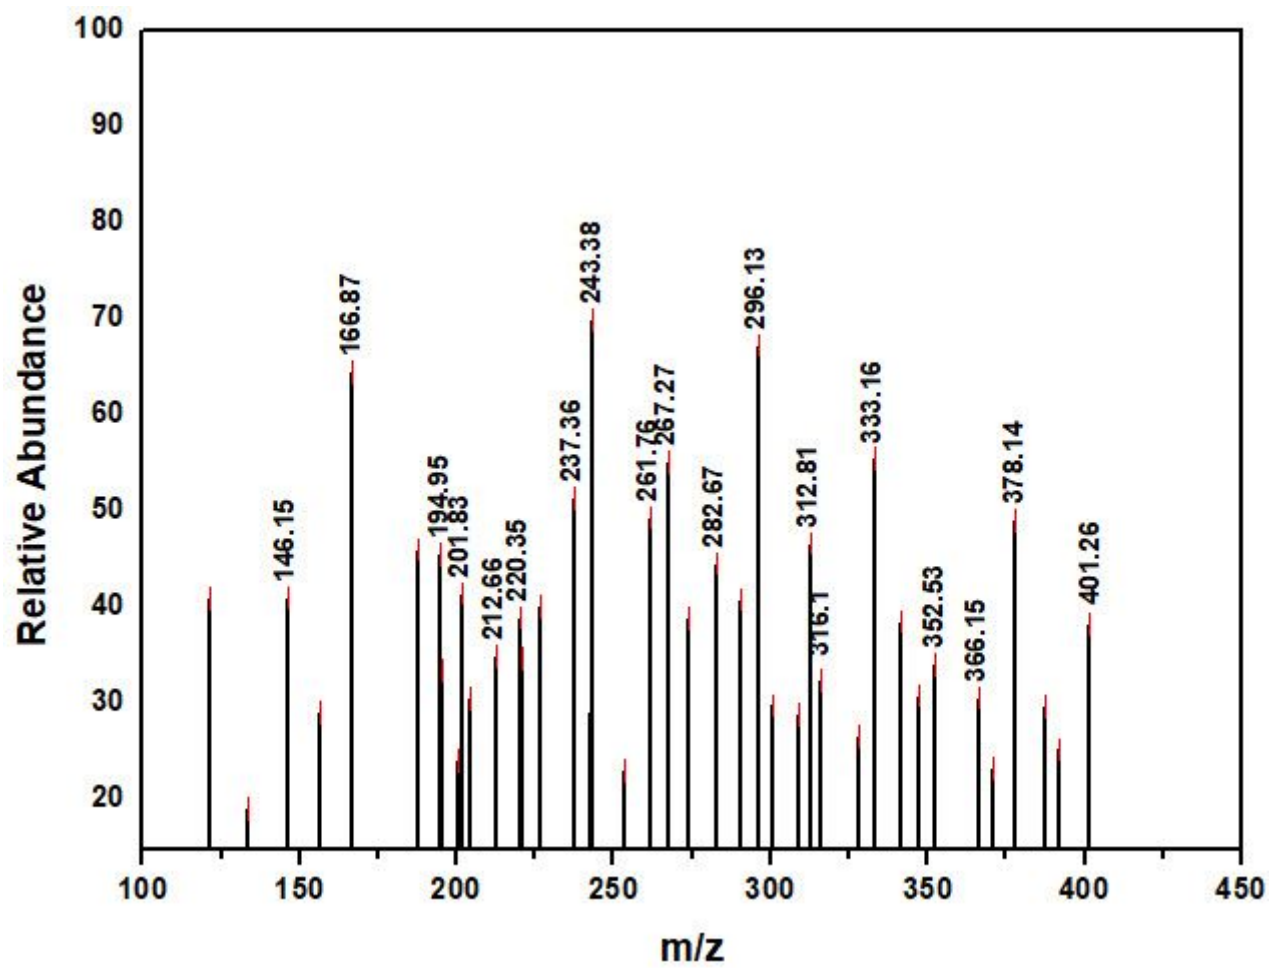

Mass spectra of compound 9a

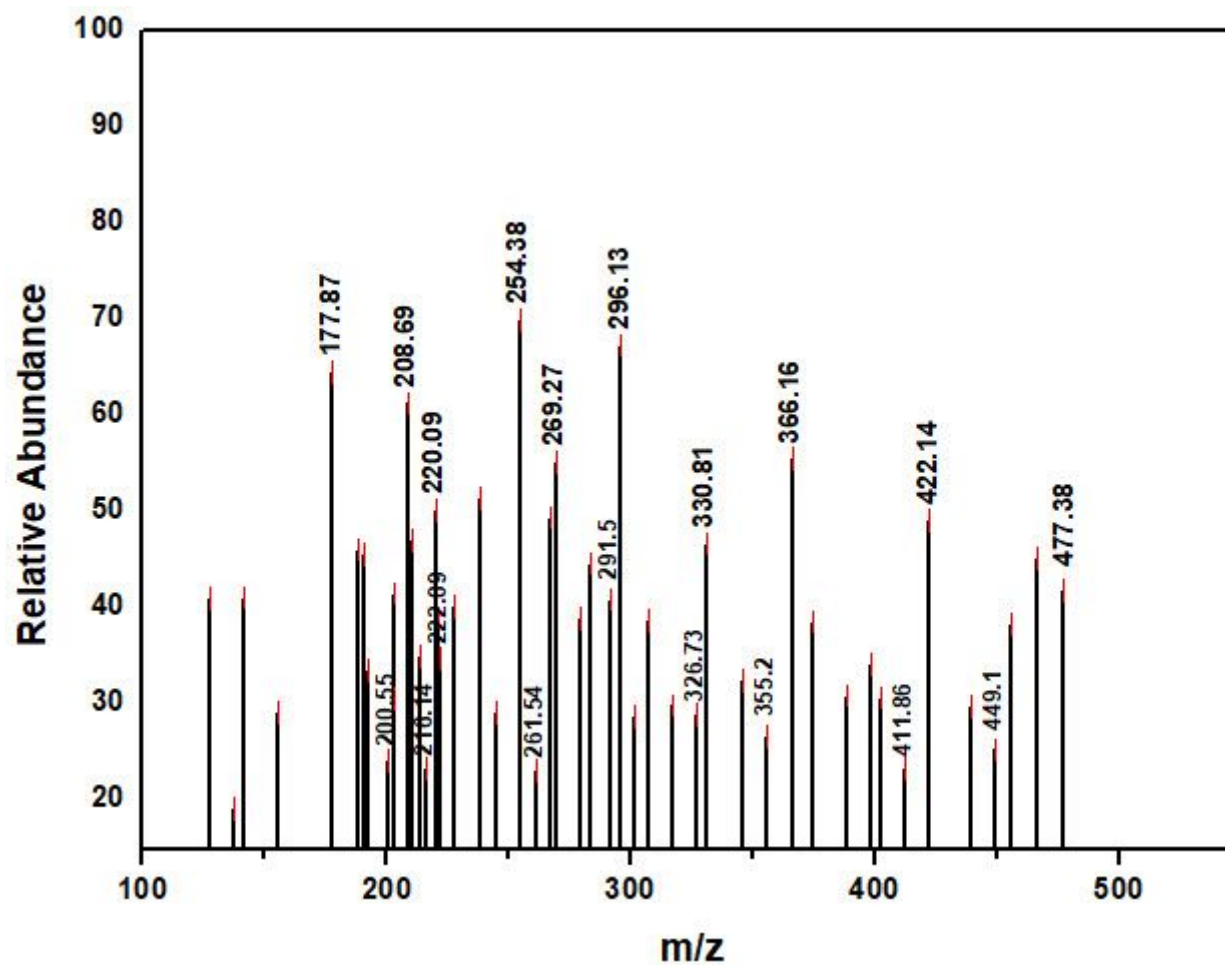

Mass spectra of compound 9b

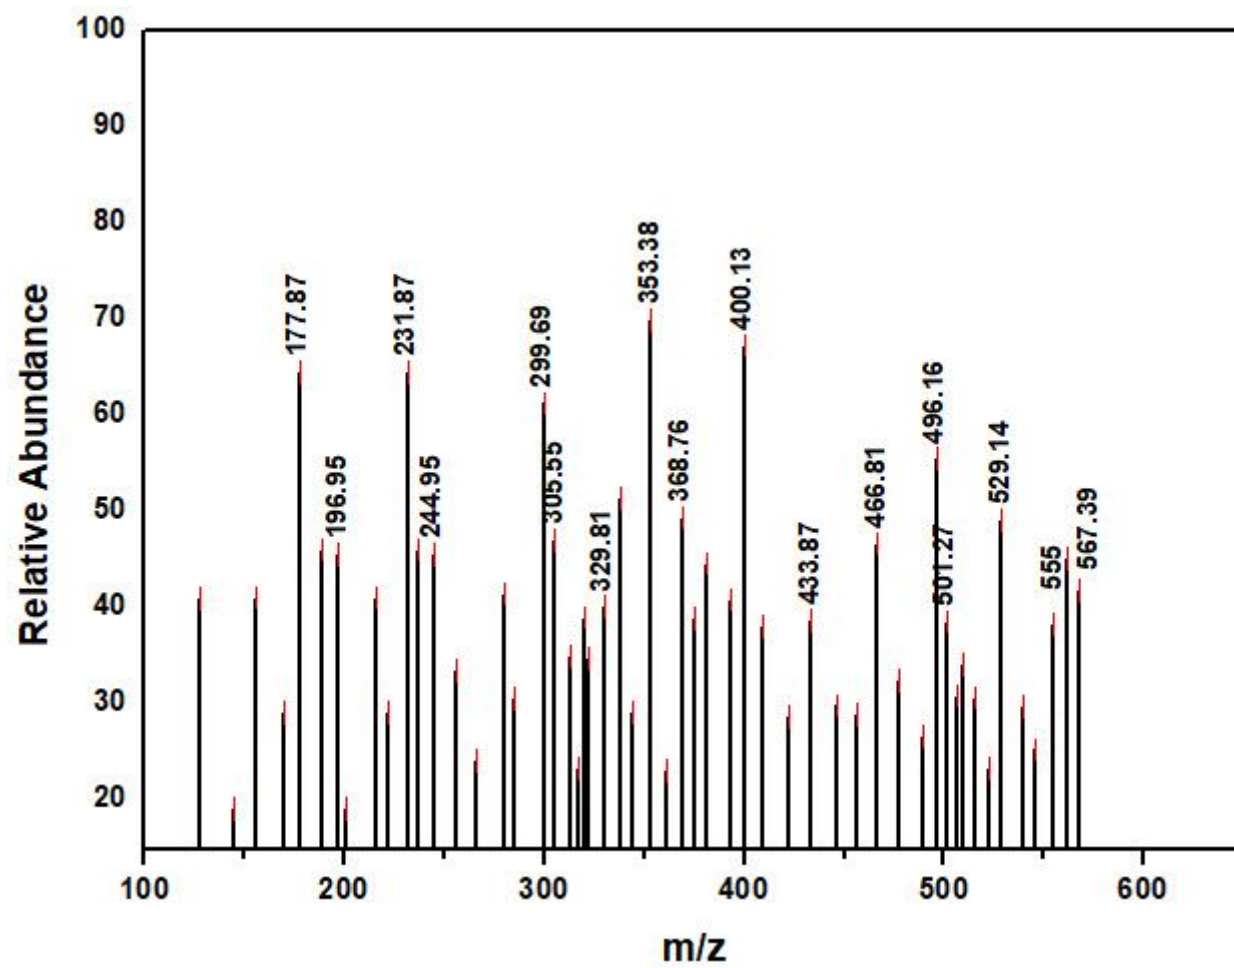

Mass spectra of compound 9c

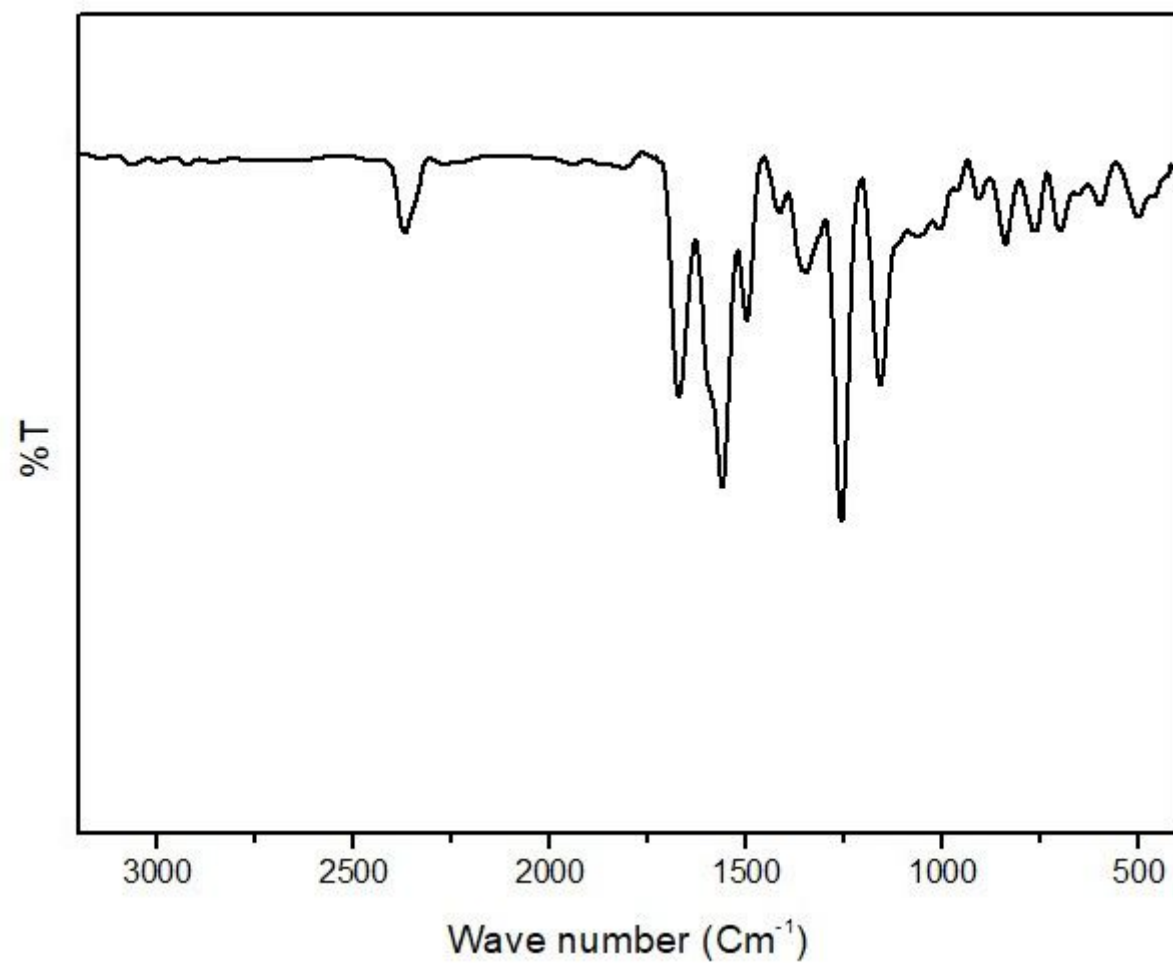

FT-IR spectra of compound 2b

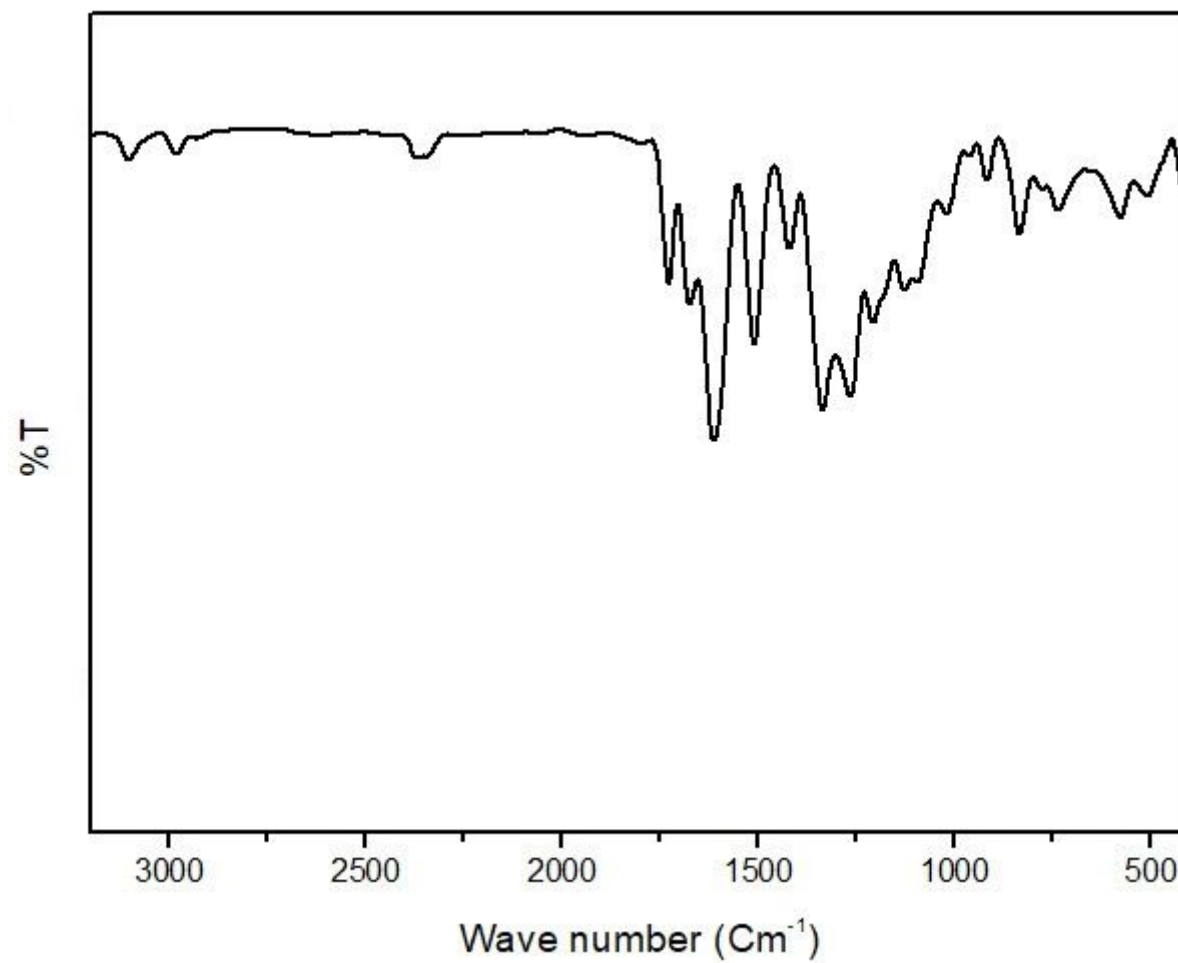

FT-IR spectra of compound 2c



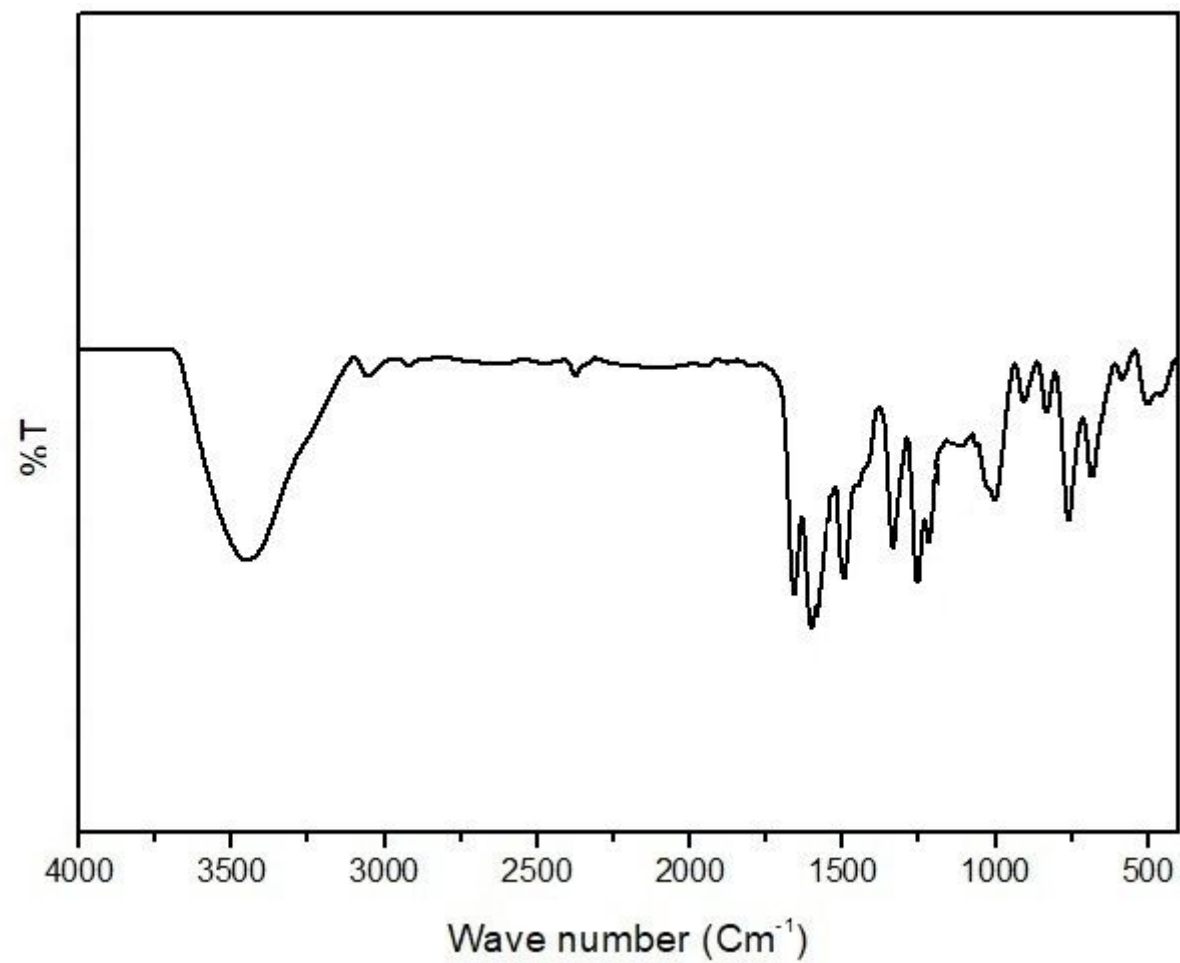

FT-IR spectra of compound 3a

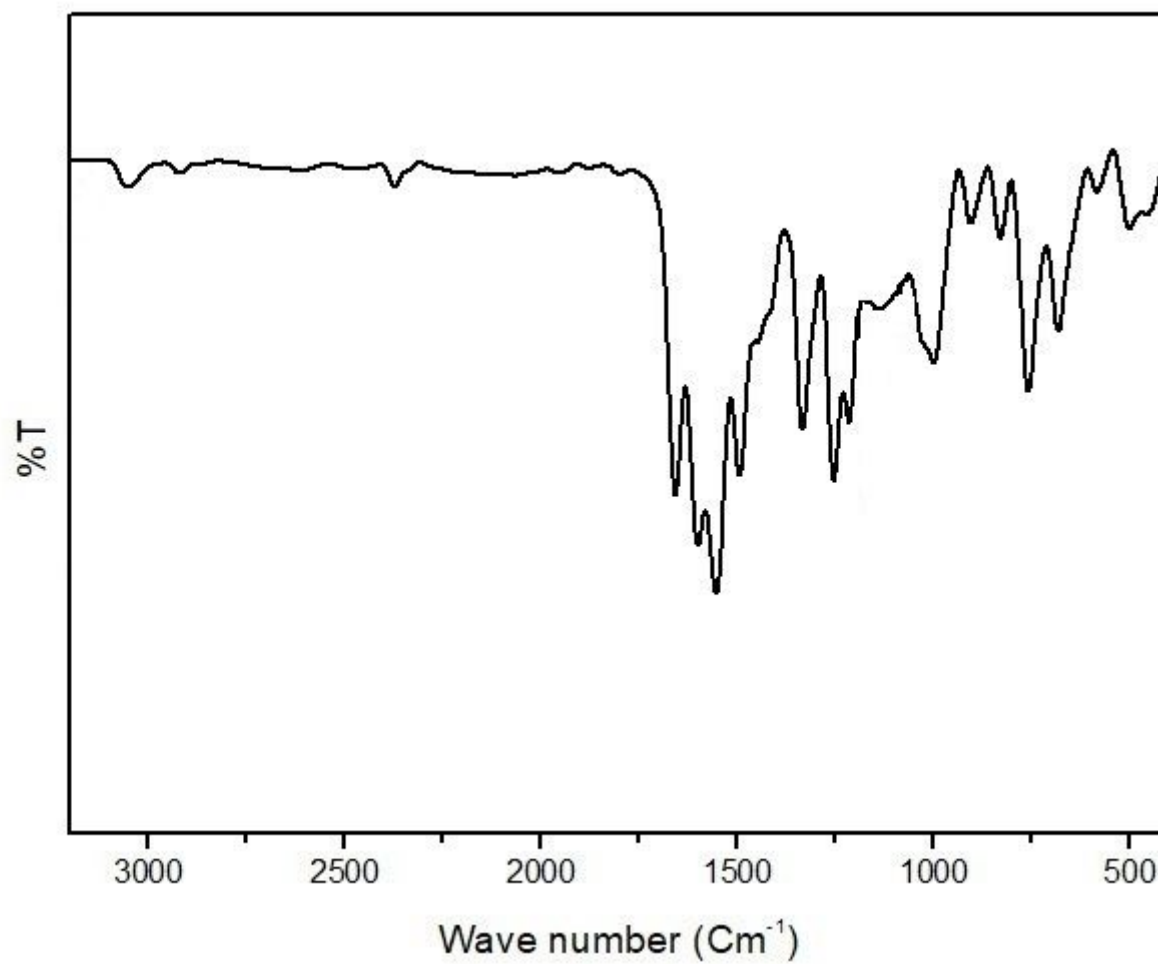

FT-IR spectra of compound 3b

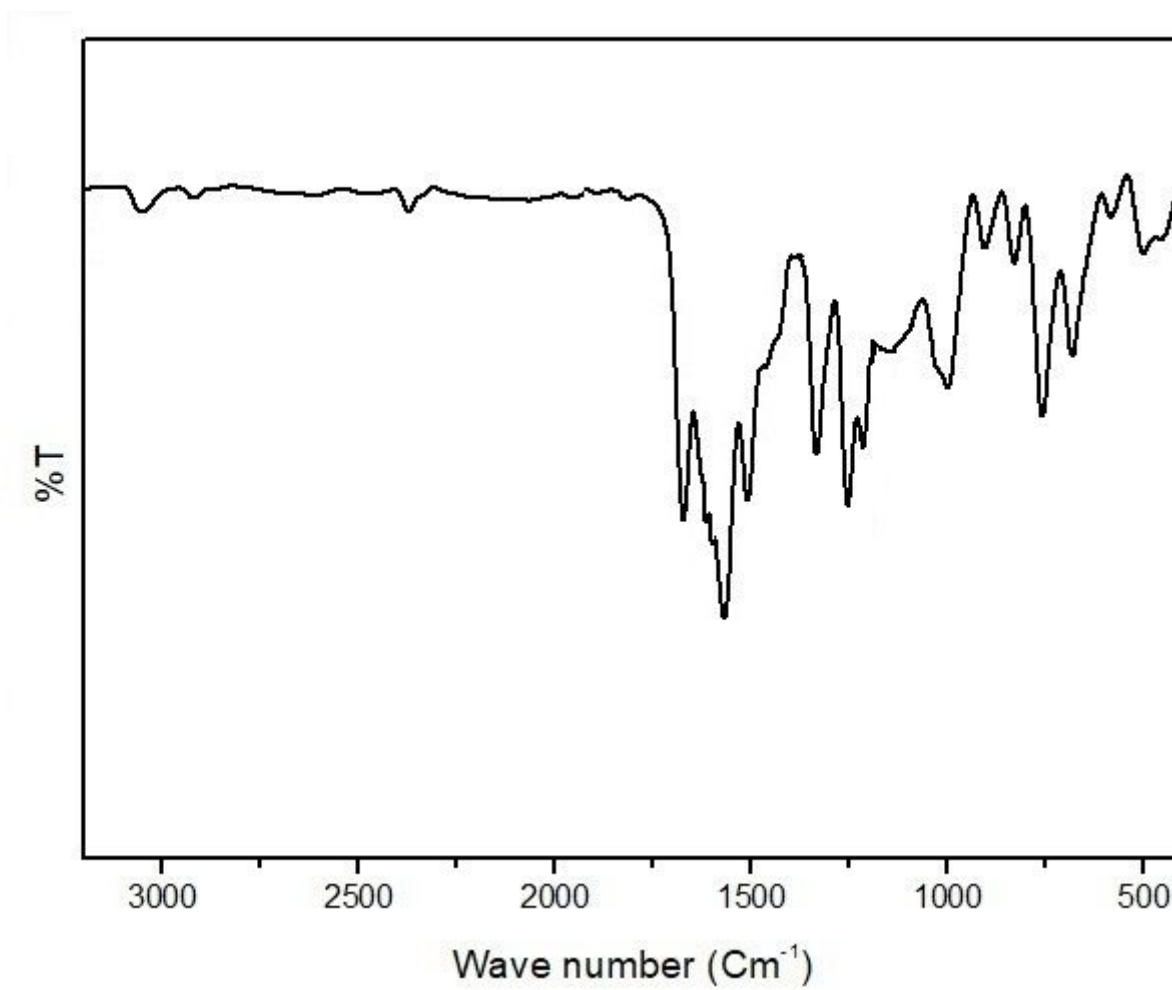

FT-IR spectra of compound 3c

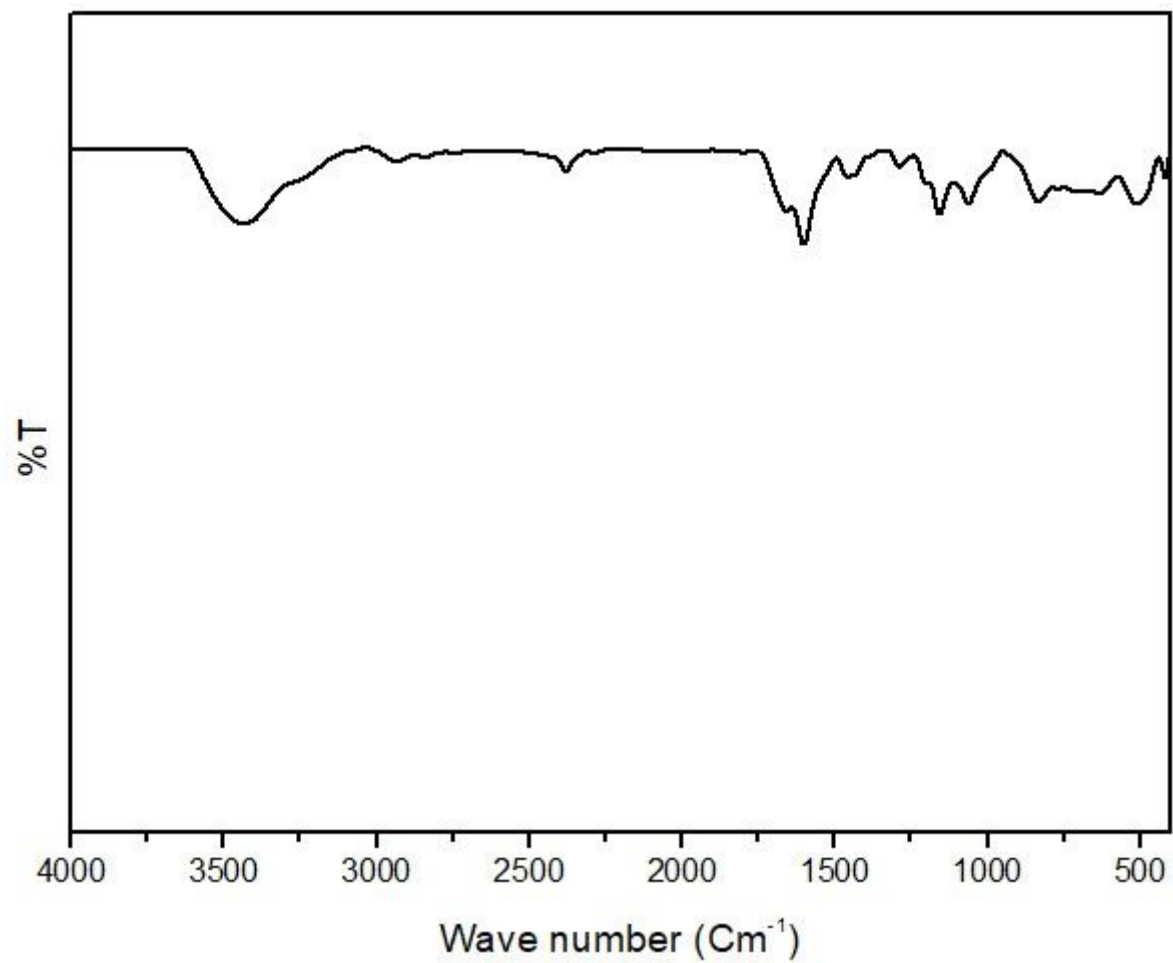

FT-IR spectra of compound 4a

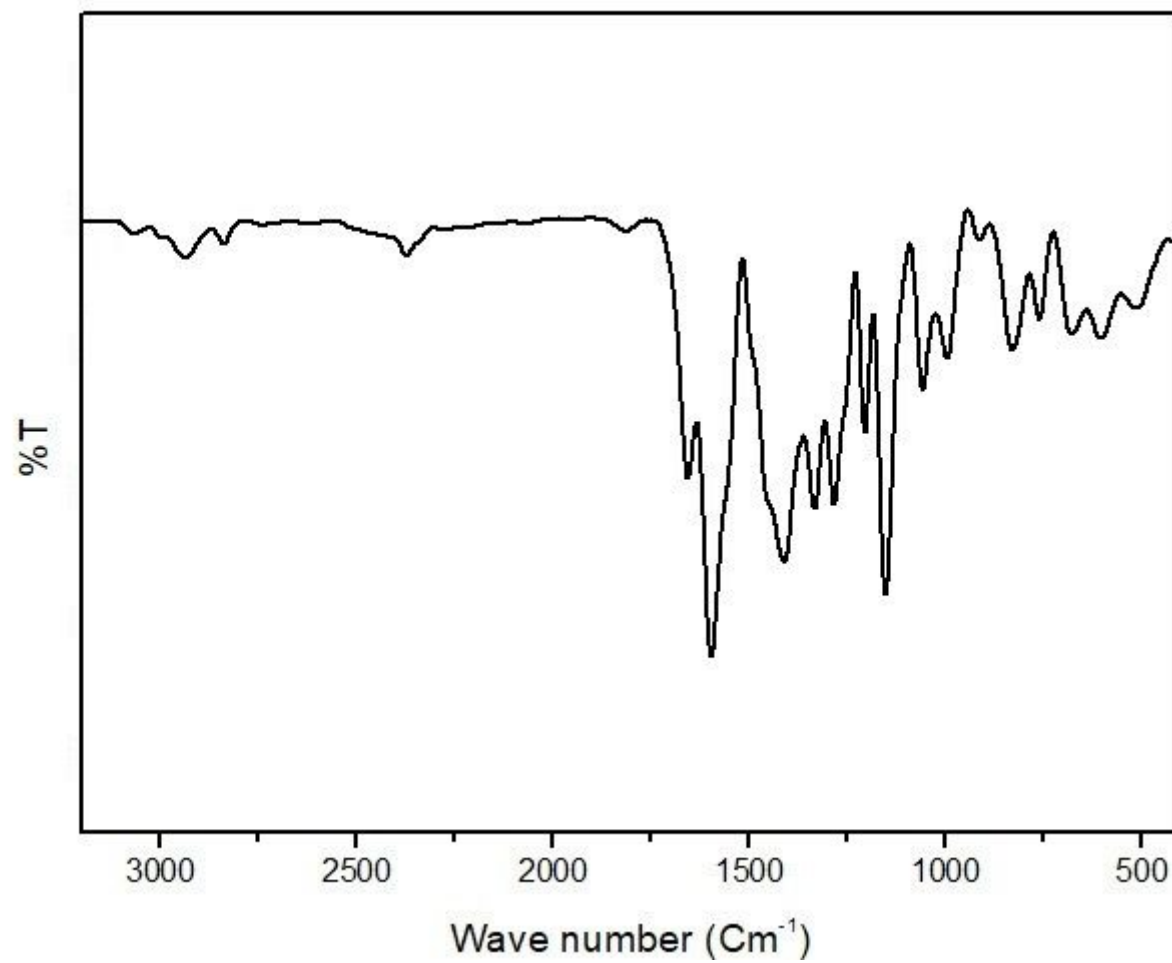

FT-IR spectra of compound 4b

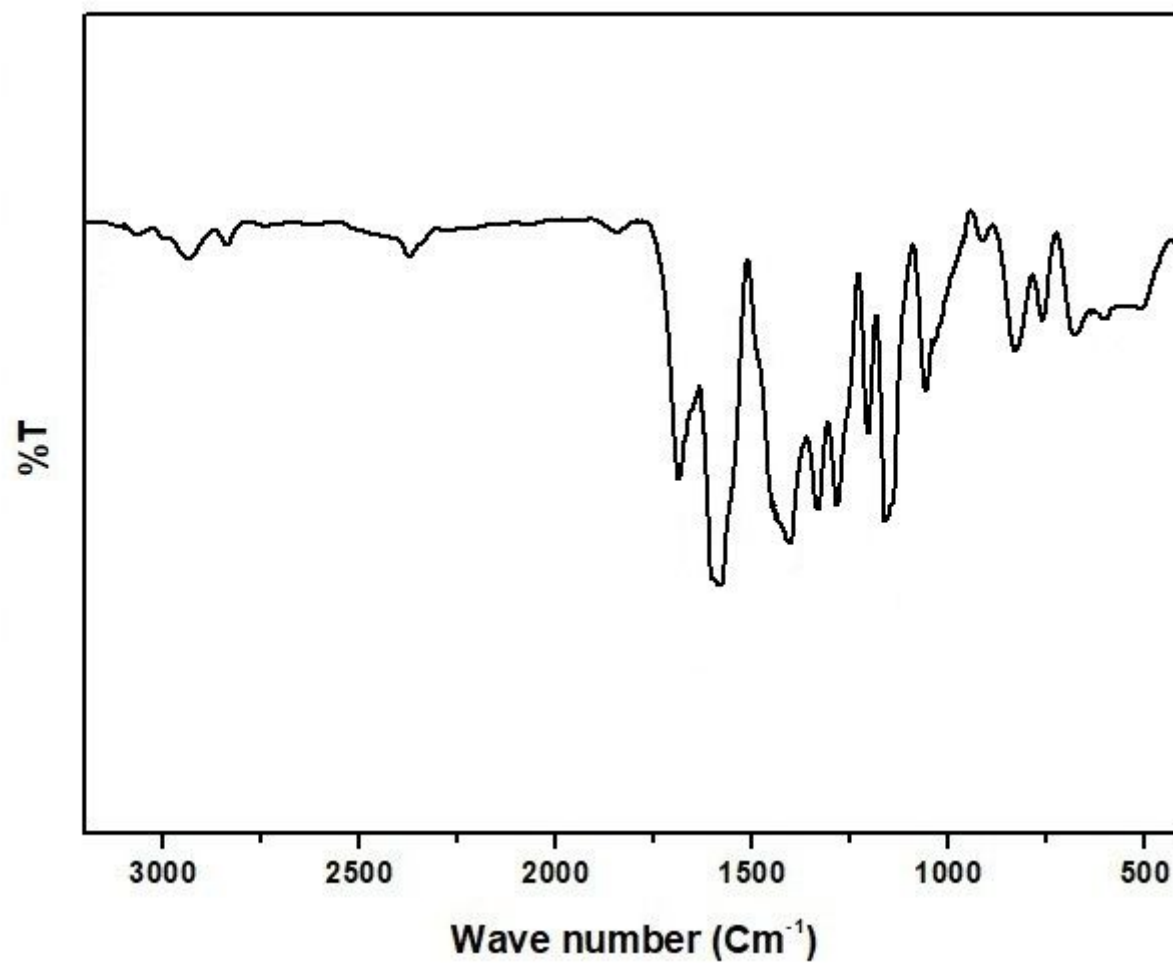

FT-IR spectra of compound 4c

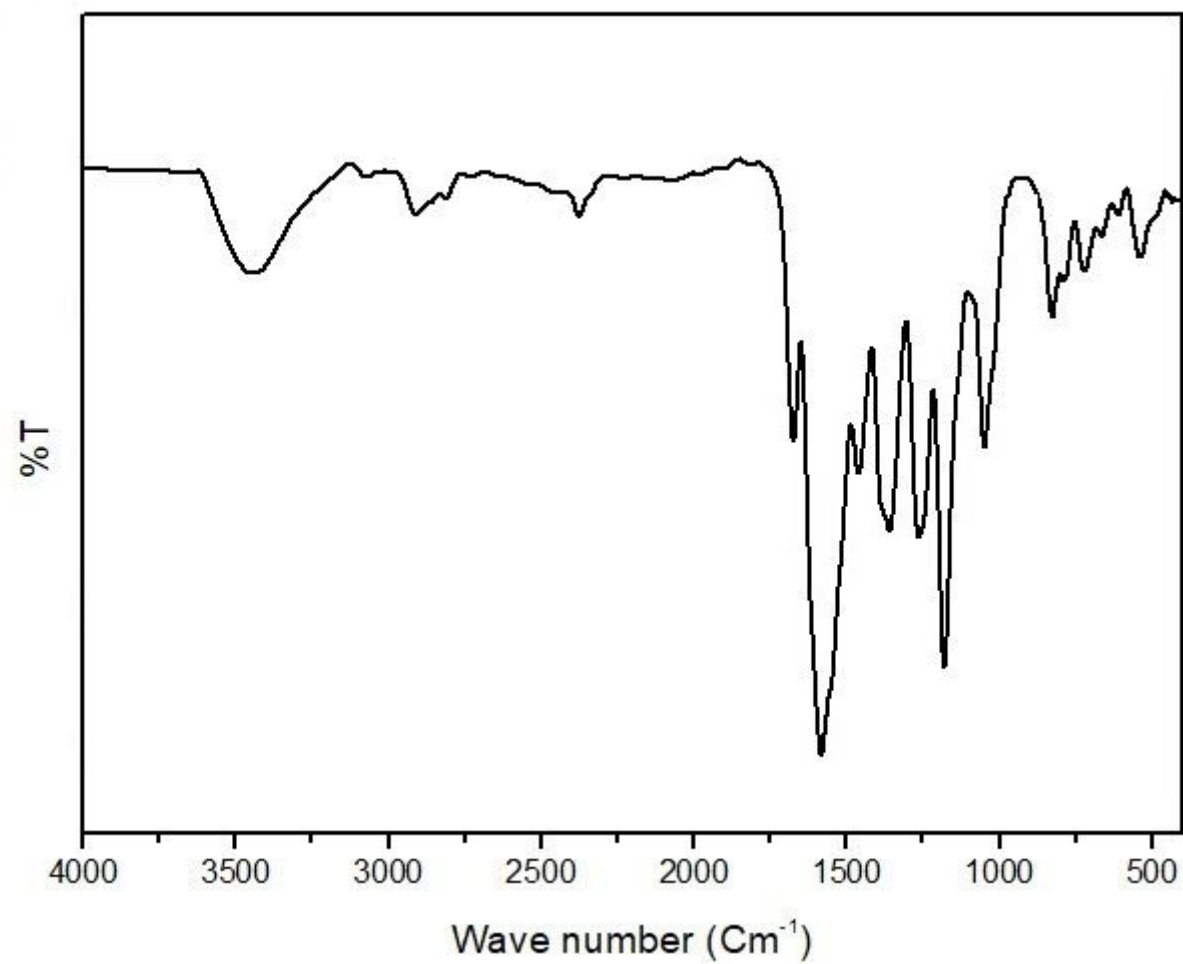

FT-IR spectra of compound 5a

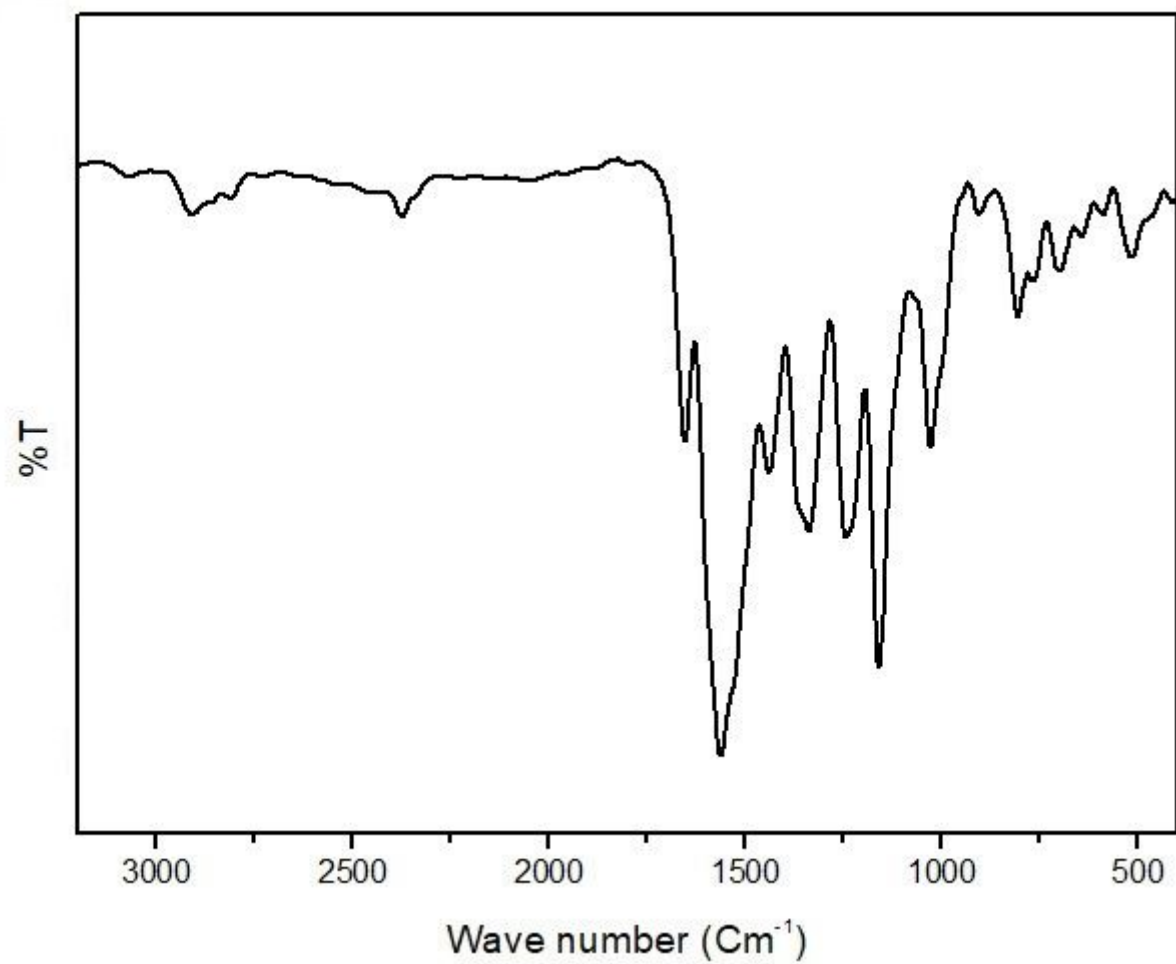

FT-IR spectra of compound 5b



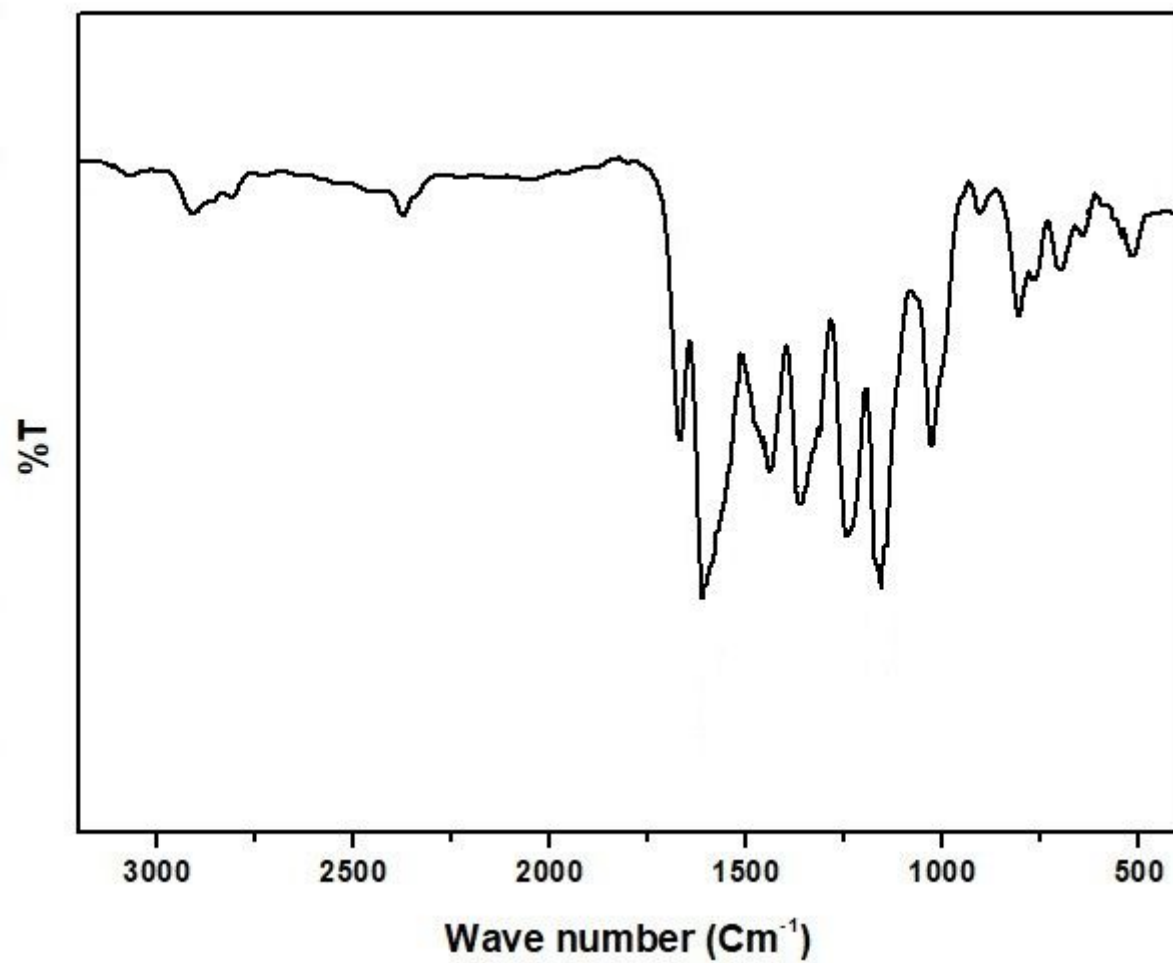

FT-IR spectra of compound 5c

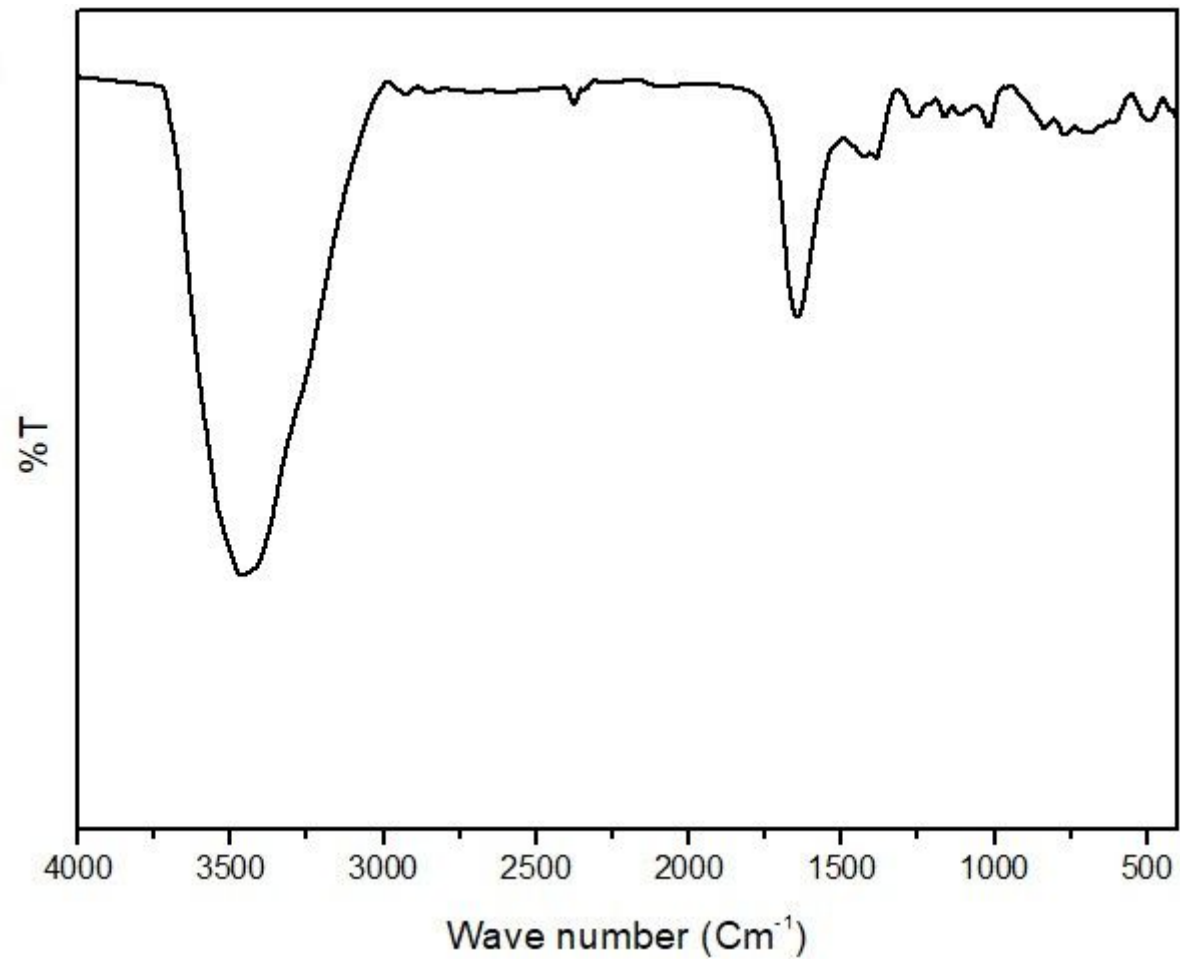

FT-IR spectra of compound 6a

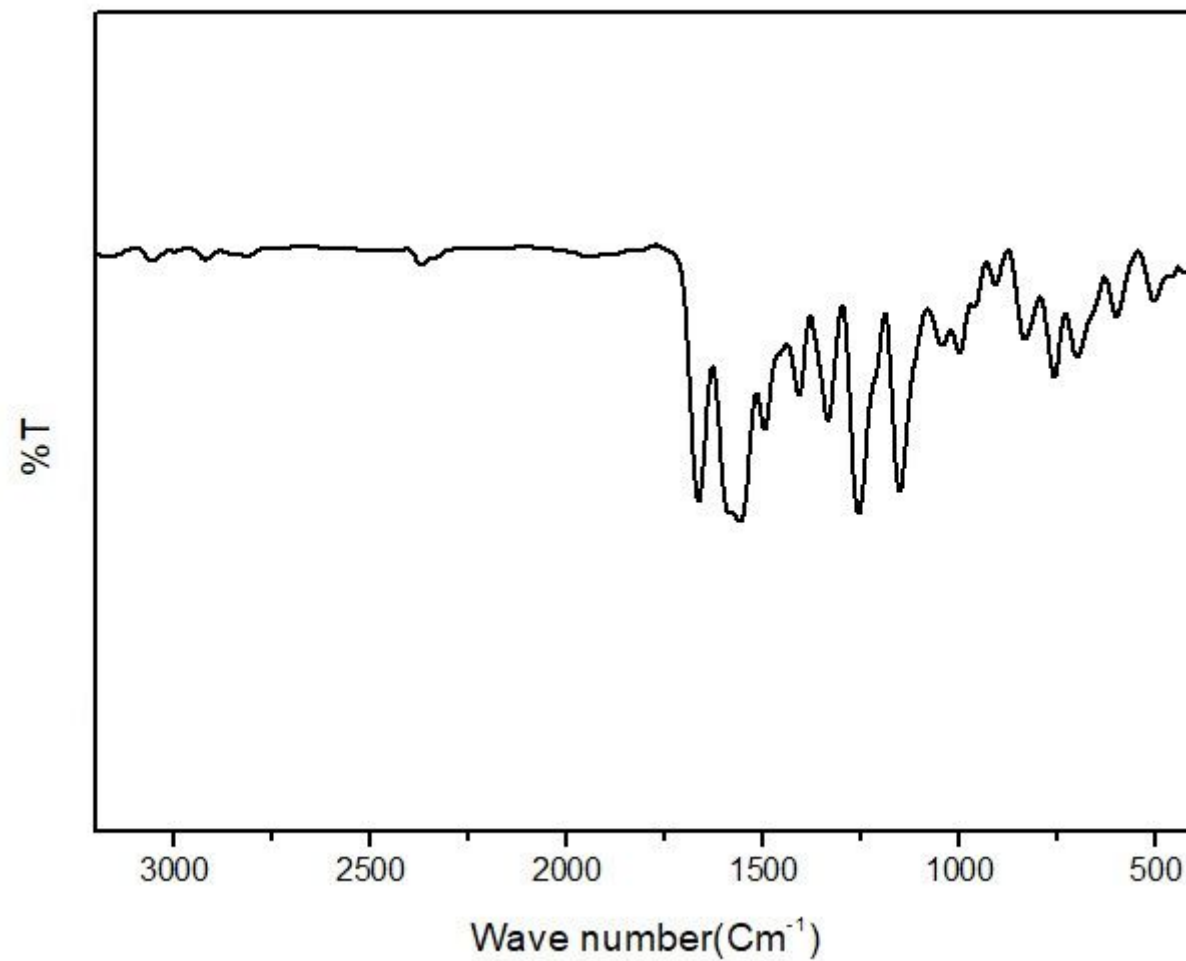

FT-IR spectra of compound 6b

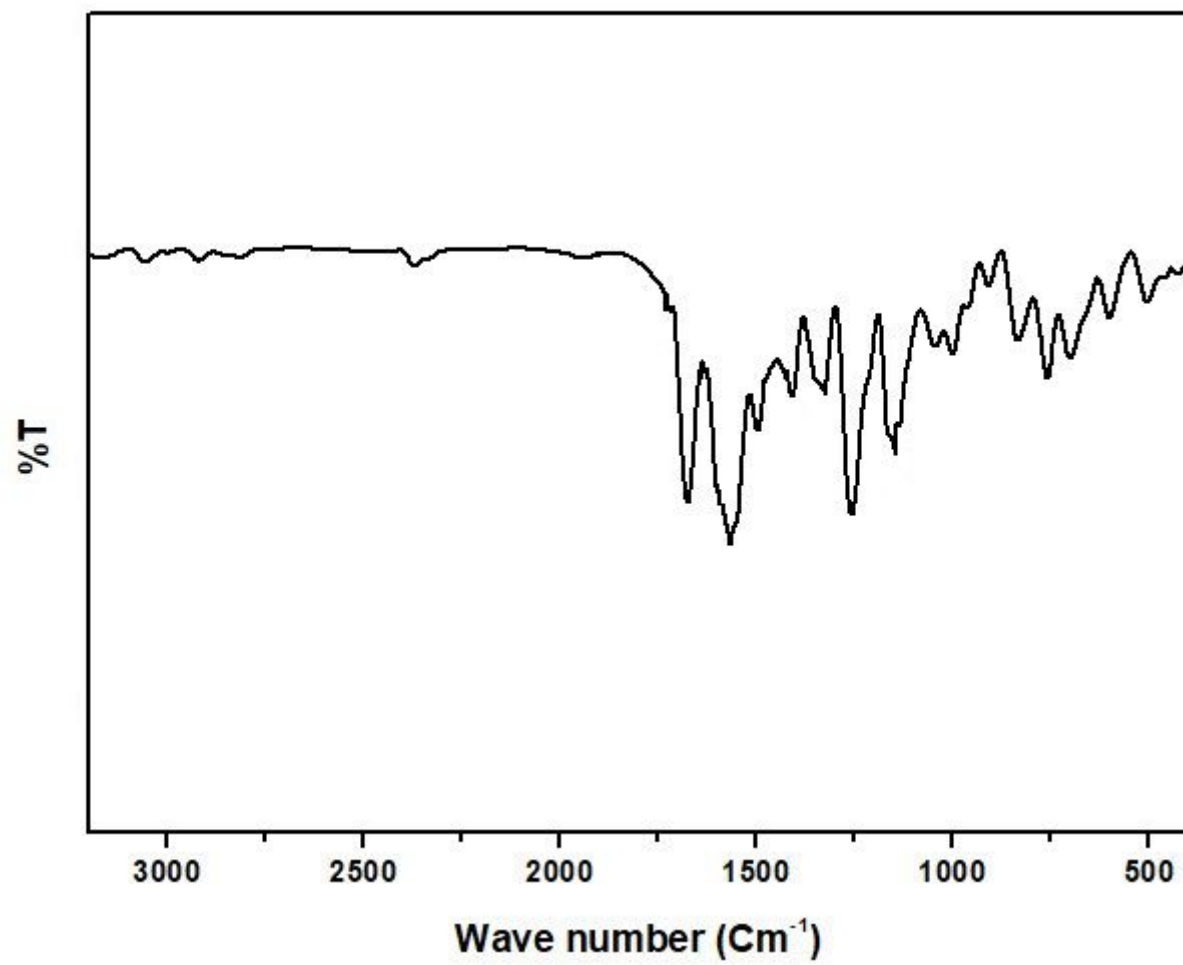

FT-IR spectra of compound 6c

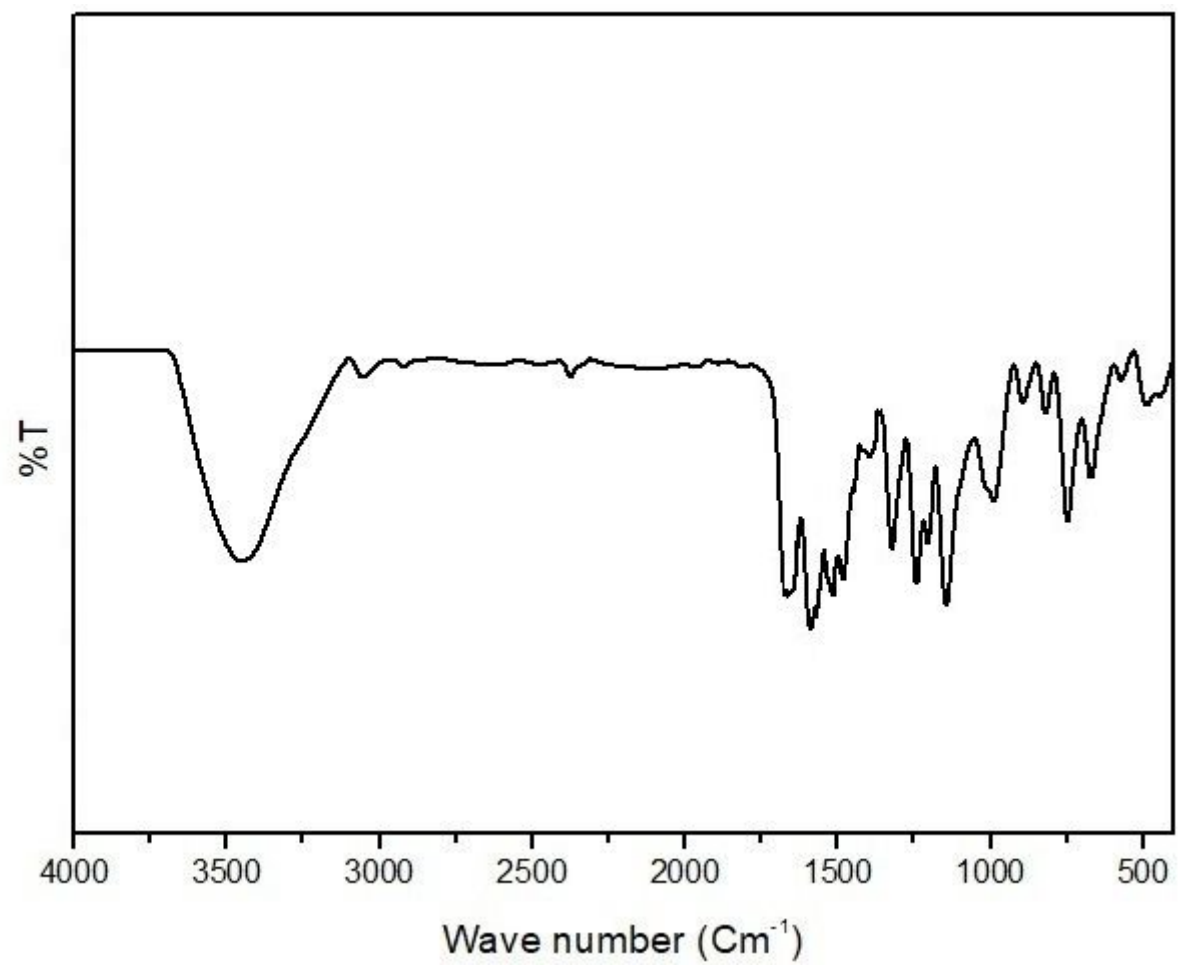

FT-IR spectra of compound 7a

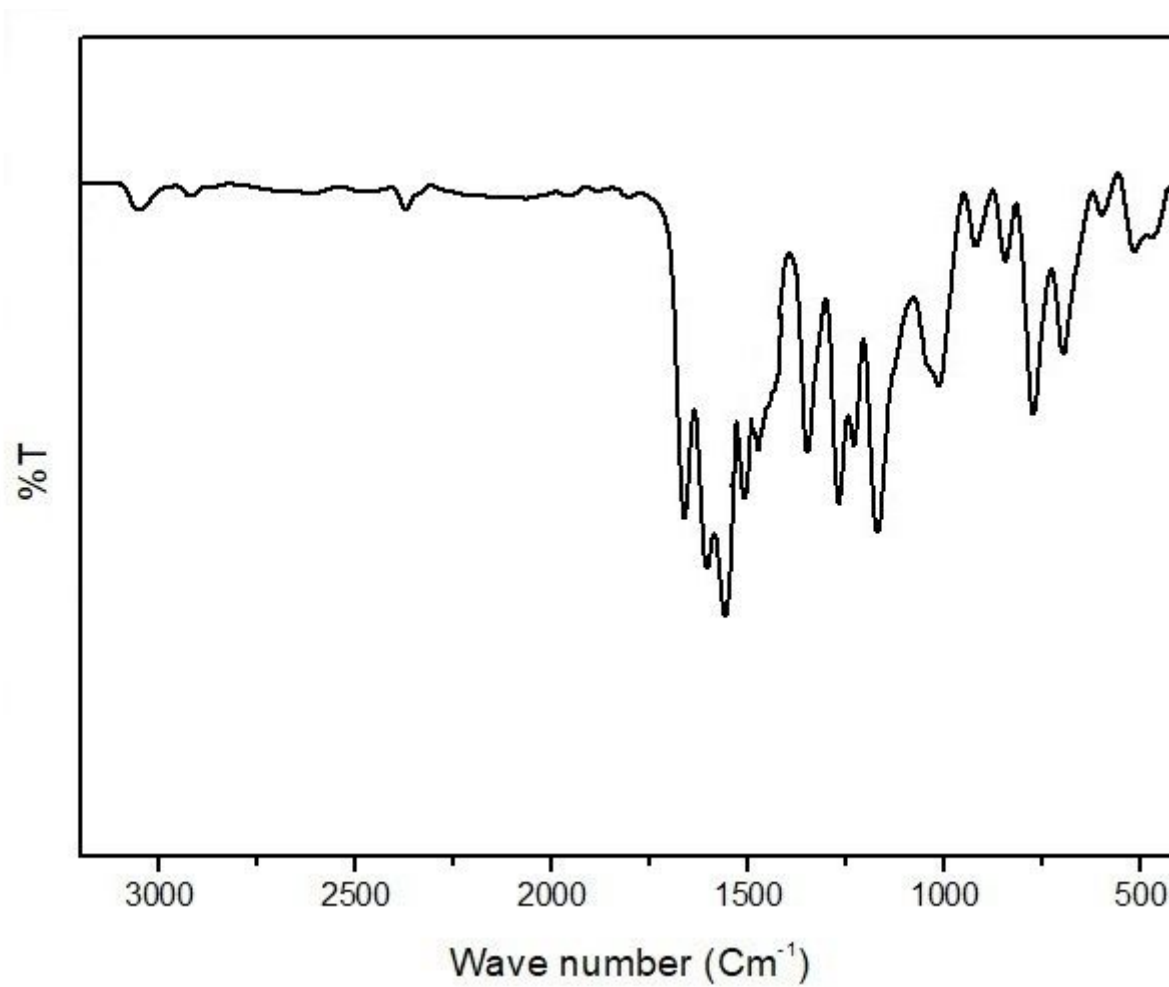

FT-IR spectra of compound 7b

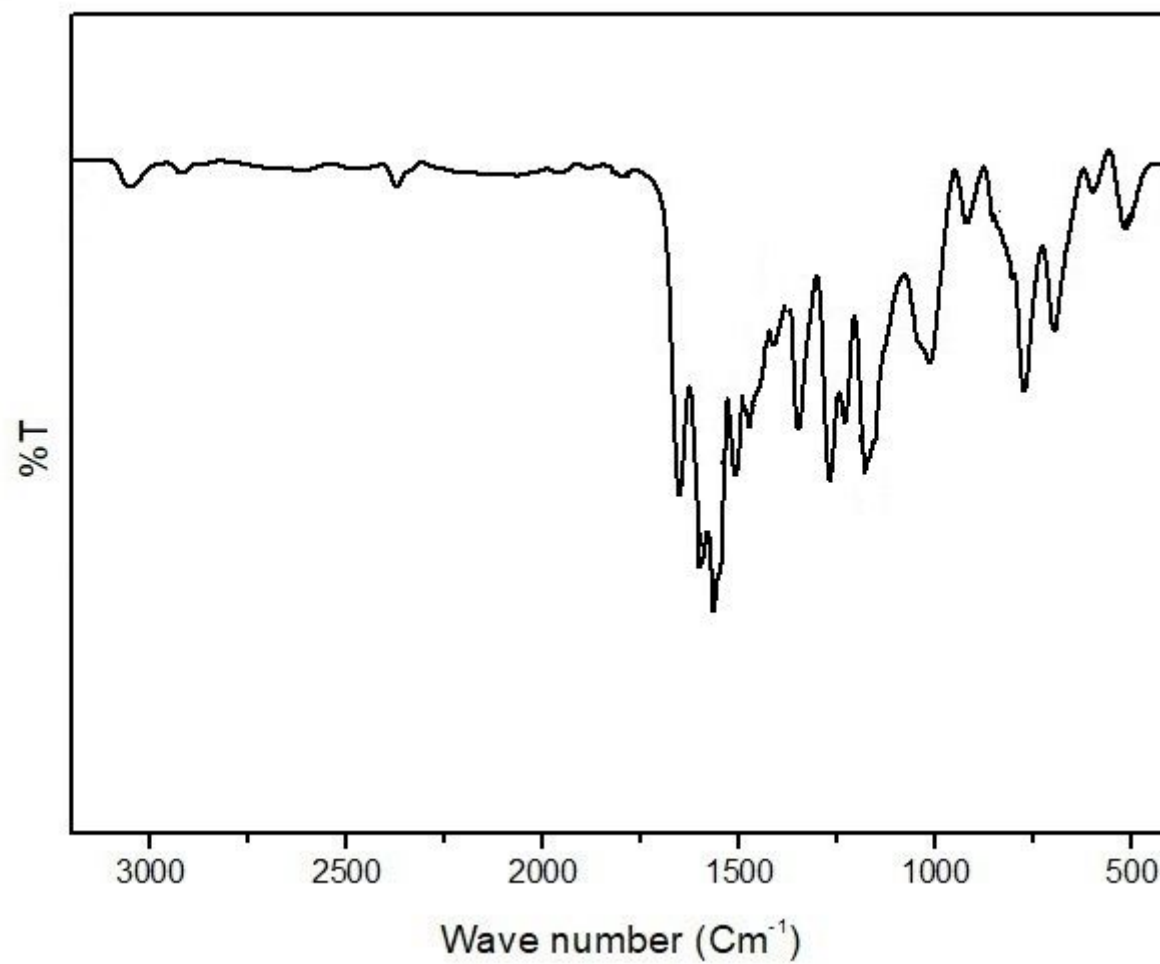

FT-IR spectra of compound 7c

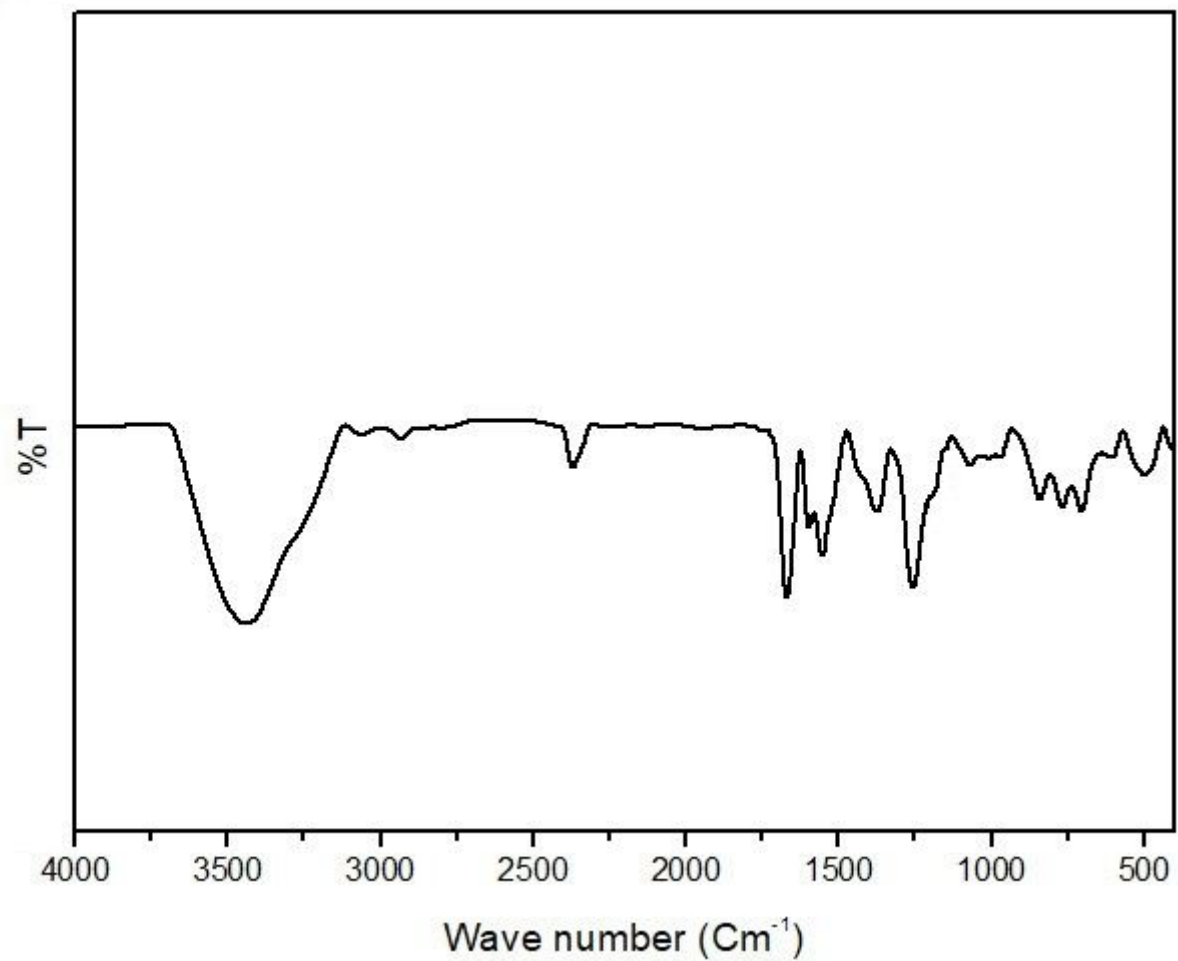

FT-IR spectra of compound 8a

S-88



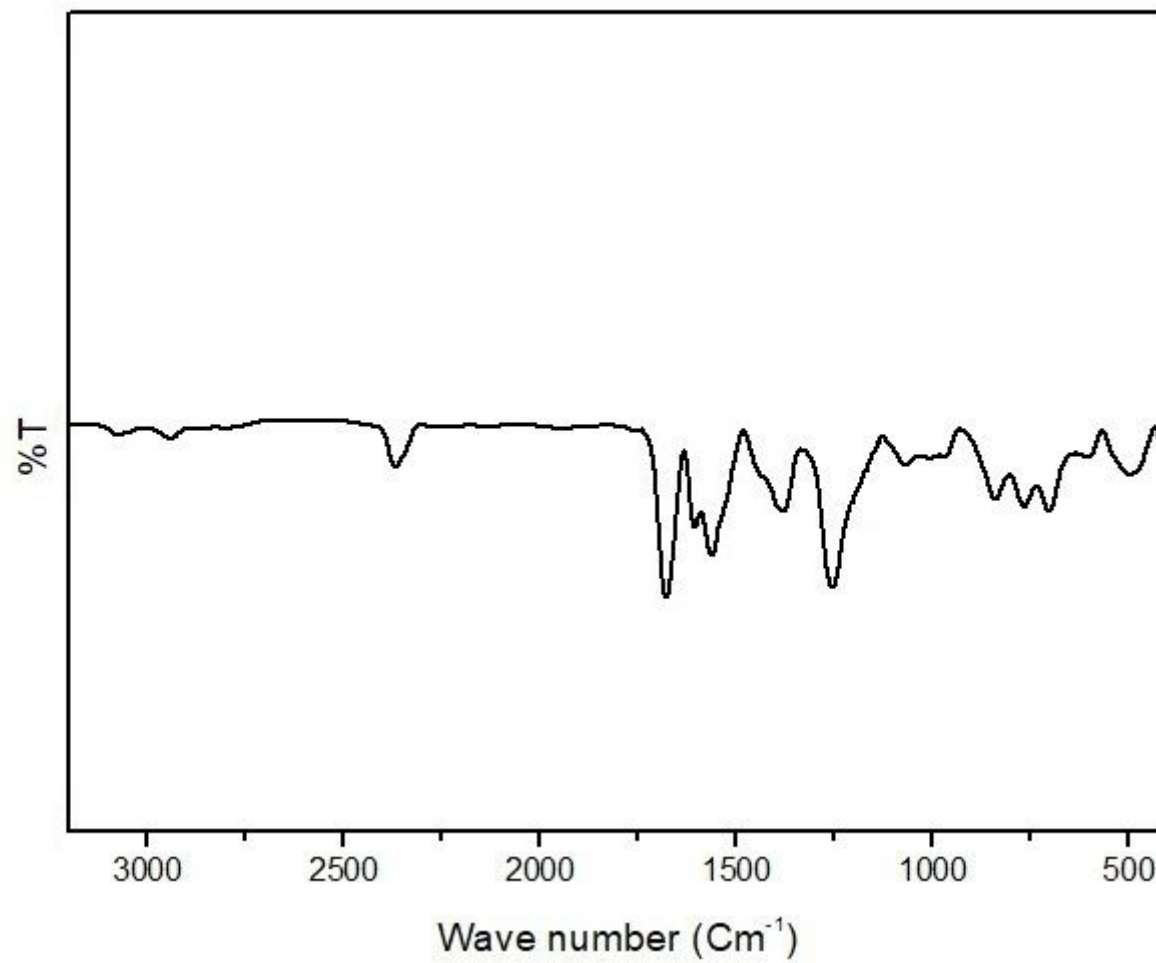

FT-IR spectra of compound 8b

S-89

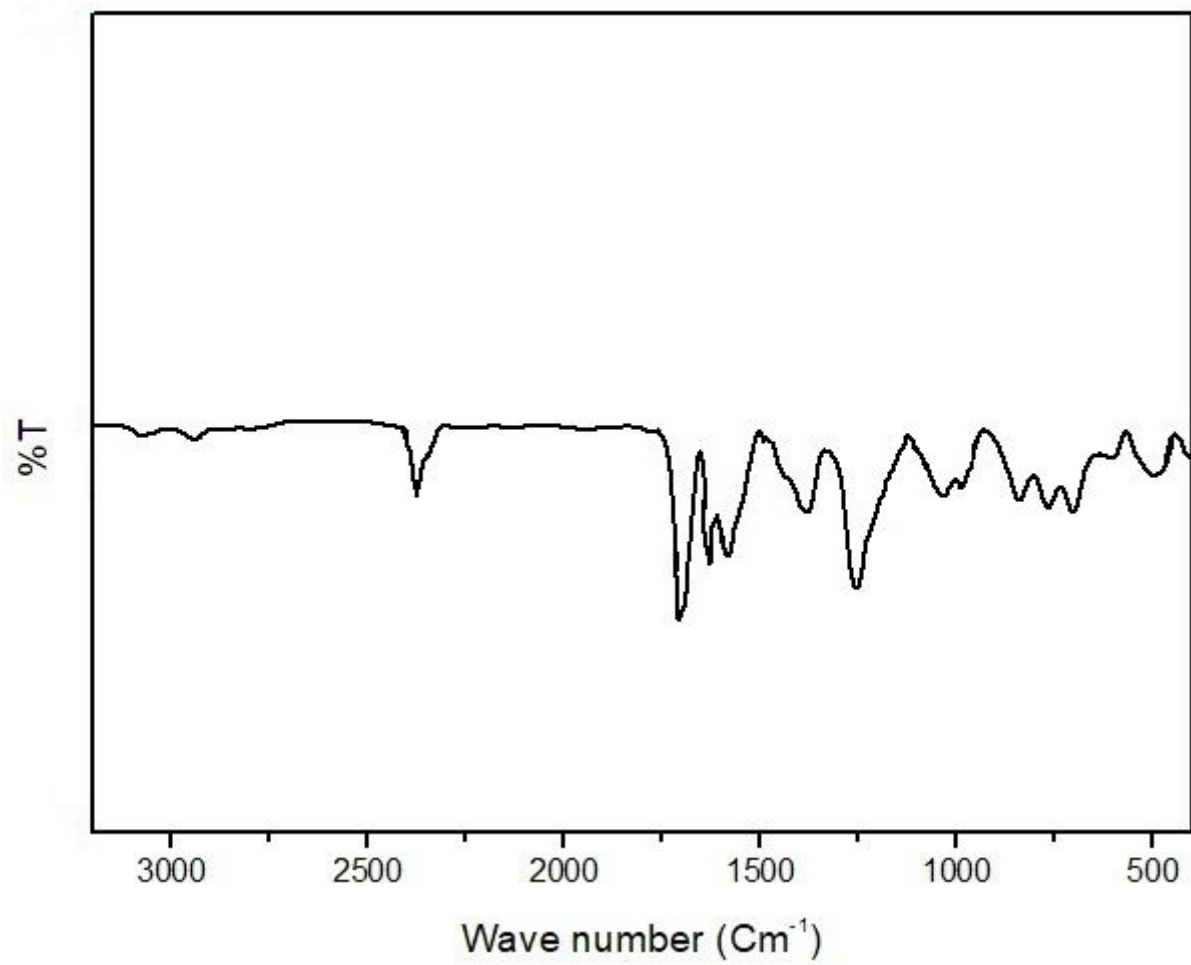

FT-IR spectra of compound 8c

S-90

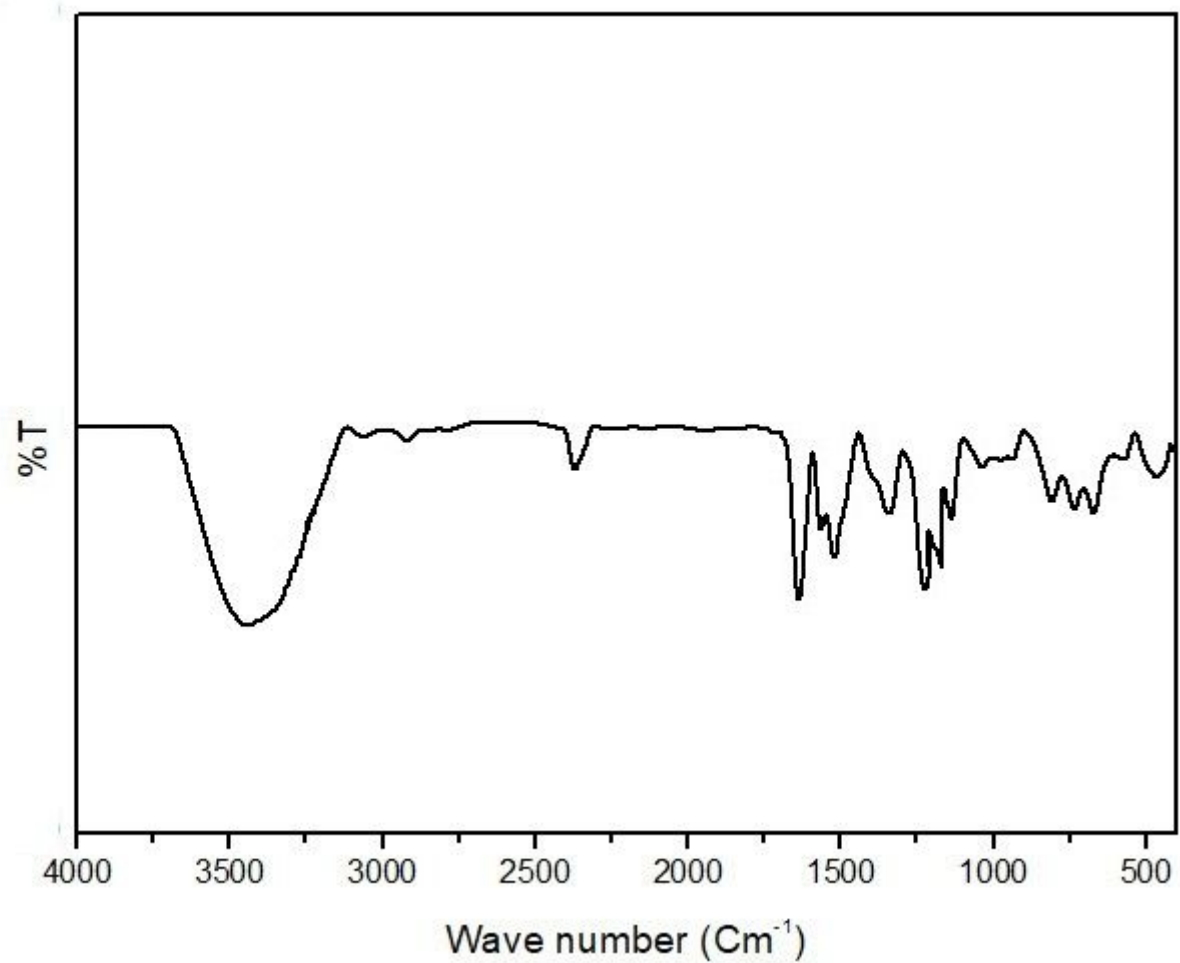

FT-IR spectra of compound 9a

S-91

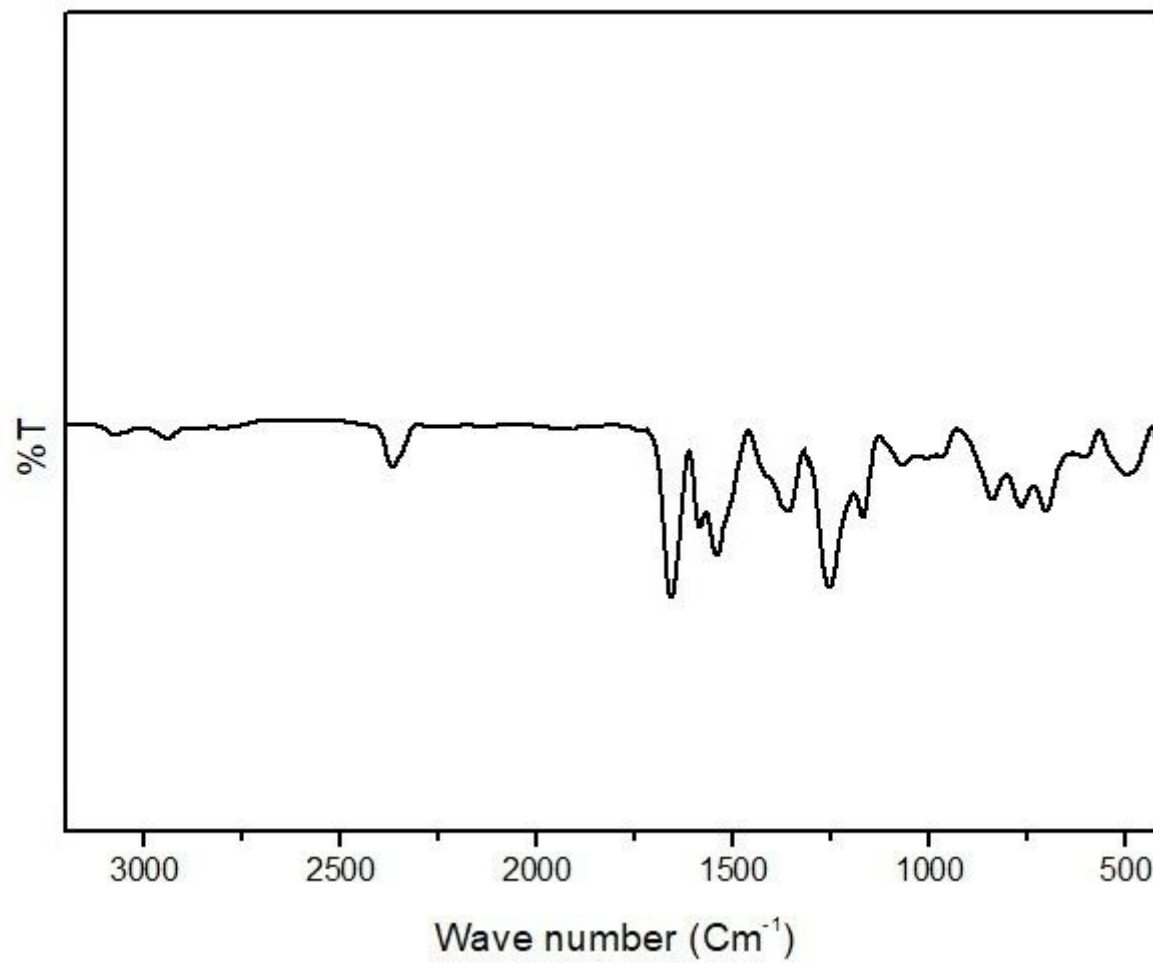

FT-IR spectra of compound 9b

S-92

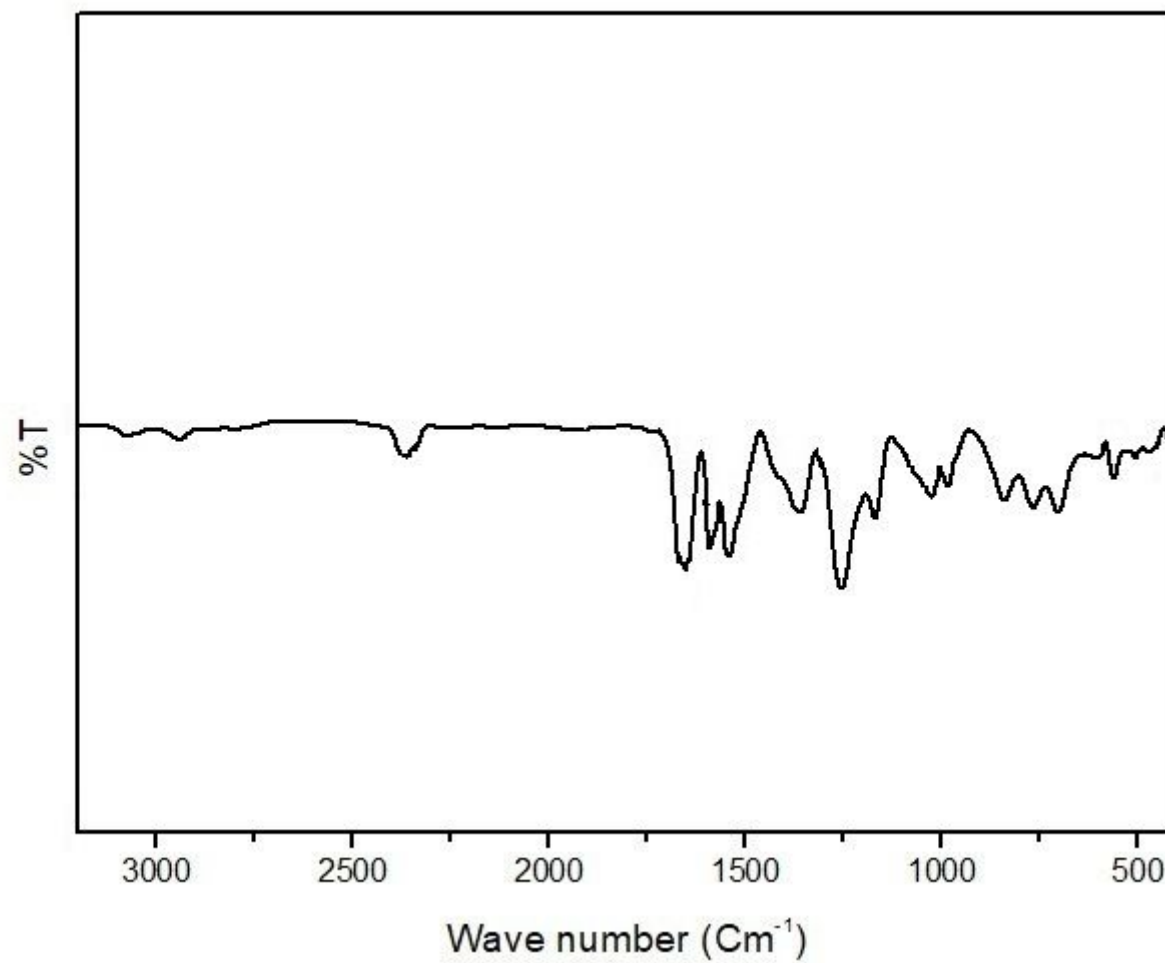

FT-IR spectra of compound 9c

| Compd     | PI3K                                       |                                                                  |              | AKT                                        |                                                           |              |
|-----------|--------------------------------------------|------------------------------------------------------------------|--------------|--------------------------------------------|-----------------------------------------------------------|--------------|
|           | Docking Score ( $\Delta G_{\text{bind}}$ ) | Docked complex (amino acid–ligand) interactions                  | Distance (Å) | Docking Score ( $\Delta G_{\text{bind}}$ ) | Docked complex (amino acid–ligand) interactions           | Distance (Å) |
| <b>3a</b> | -9.9                                       | <b>H-bond</b><br>Glu259:OE2---compound 3a                        | 2.48         | -9.3                                       | <b>H-bond</b><br>Gly162:N---compound 3a                   | 2.85         |
|           |                                            | <b><math>\pi</math>-<math>\pi</math></b><br>His701---compound 3a | 5.31         |                                            | <b><math>\pi</math>-cation</b><br>Lys179:NZ---compound 3a | 3.92         |
| <b>3b</b> | -8.8                                       | <b>H-bond</b><br>Asn756:ND2---compound 3b                        | 2.99         | -10.2                                      | <b>H-bond</b><br>Lys158:N---compound 3b                   | 2.99         |
|           |                                            | <b><math>\pi</math>-<math>\pi</math></b><br>Phe666---compound 3b | 4.03         |                                            | <b><math>\pi</math>-cation</b><br>Lys179:NZ---compound 3b | 4.34         |
|           |                                            | <b><math>\pi</math>-cation</b><br>Lys271:NZ---compound 3b        | 5.13         |                                            |                                                           |              |
| <b>3c</b> | -10.4                                      | <b>H-bond</b><br>Gln630:NE2---compound 3c                        | 3.00         | -10.3                                      | <b>H-bond</b><br>Lys179:NZ---compound 3c                  | 3.00         |
|           |                                            | Cys838:N---compound 3c                                           | 2.89         |                                            | Thr195:OG1---compound 3c                                  | 2.96         |
|           |                                            | Tyr836:O---compound 3c                                           | 2.99         |                                            | Thr195:OG1---compound 3c                                  | 2.96         |
|           |                                            | Met811:O---compound 3c                                           | 2.00         |                                            | Glu198:OE1---compound 3c                                  | 1.96         |
|           |                                            | Ser629:O---compound 3c                                           | 2.24         |                                            |                                                           |              |
|           |                                            | <b><math>\pi</math>-cation</b><br>Arg818:NH2---compound 3c       | 5.98         |                                            |                                                           |              |
| <b>4a</b> | -8.3                                       | <b>H-bond</b><br>Asn756:ND2---compound 4a                        | 3.00         | -8.6                                       | <b>H-bond</b><br>Glu198:OE1---compound 4a                 | 2.60         |
|           |                                            | Arg818:NH1---compound 4a                                         | 2.84         |                                            |                                                           |              |
|           |                                            | <b><math>\pi</math>-<math>\pi</math></b><br>Phe666---compound 4a | 4.38         |                                            |                                                           |              |
|           |                                            | <b><math>\pi</math>-cation</b><br>Lys271:NZ---compound 4a        | 5.37         |                                            |                                                           |              |
|           |                                            |                                                                  |              |                                            |                                                           |              |

|           |      |                                                                                                                                                                                                                                                         |                                              |       |                                                                                                                           |                              |
|-----------|------|---------------------------------------------------------------------------------------------------------------------------------------------------------------------------------------------------------------------------------------------------------|----------------------------------------------|-------|---------------------------------------------------------------------------------------------------------------------------|------------------------------|
| <b>4b</b> | -9.1 | <b>H-bond</b><br>Ser854:OG---compound 4b                                                                                                                                                                                                                | 2.76                                         | -10.4 | <b><math>\pi</math>-cation</b><br>Lys179:NZ---compound 4b                                                                 | 4.23                         |
| <b>4c</b> | -8.9 | <b>H-bond</b><br>Arg87:NH2---compound 4c<br>Arg93:NH2---compound 4c<br>Arg93:NH2---compound 4c<br>Glu707:OE1---compound 4c<br><b><math>\pi</math>-<math>\pi</math></b><br>Arg115---compound 4c<br><b><math>\pi</math>-cation</b><br>Arg87---compound 4c | 2.98<br>2.99<br>3.00<br>2.36<br>4.10<br>5.15 | -10.0 | <b>H-bond</b><br>Thr195:N---compound 4c<br>Thr195:OG1---compound 4c<br>Thr195:OG1---compound 4c                           | 2.98<br>5.79<br>2.12         |
| <b>5a</b> | -9.5 | <b><math>\pi</math>-<math>\pi</math></b><br>Phe666---compound 5a<br><b><math>\pi</math>-cation</b><br>Arg662:NH2---compound 5a<br><b><math>\pi</math>-sigma</b><br>Arg662:CG---compound 5a                                                              | 4.26<br>5.88<br>3.93                         | -9.1  | <b>H-bond</b><br>Lys179:NZ---compound 5a                                                                                  | 2.97                         |
| <b>5b</b> | -8.7 | <b>H-bond</b><br>Tyr272:N---compound 5b<br><b><math>\pi</math>-<math>\pi</math></b><br>Phe666---compound 5b<br><b><math>\pi</math>-cation</b><br>ARG818:NH1---compound 5b<br>ARG818:NH2---compound 5b                                                   | 2.99<br>3.80<br>5.65<br>5.72                 | -10.5 | <b><math>\pi</math>-cation</b><br>Lys179:NZ---compound 5b                                                                 | 4.18                         |
| <b>5c</b> | -9.2 | <b>H-bond</b><br>Asn170:ND2---compound 5c<br>Ser275:OG---compound 5c<br>Ser275:OG---compound 5c<br>Ser275:OG---compound 5c                                                                                                                              | 2.92<br>2.98<br>3.00<br>2.32                 | -10.3 | <b>H-bond</b><br>Lys158:N---compound 5c<br>Thr195:N---compound 5c<br>Thr195:OG1---compound 5c<br>Thr195:OG1---compound 5c | 2.15<br>2.97<br>2.66<br>2.42 |

|           |      |                                                                                                                                                                                                                                               |                                                      |       |                                                                                                                                                                                                                                                                         |                                                              |
|-----------|------|-----------------------------------------------------------------------------------------------------------------------------------------------------------------------------------------------------------------------------------------------|------------------------------------------------------|-------|-------------------------------------------------------------------------------------------------------------------------------------------------------------------------------------------------------------------------------------------------------------------------|--------------------------------------------------------------|
|           |      | Asn756:ND2---compound 5c<br>Asn756:ND2---compound 5c<br>Asn756:ND2---compound 5c                                                                                                                                                              | 2.87<br>3.00<br>2.95                                 |       |                                                                                                                                                                                                                                                                         |                                                              |
| <b>6a</b> | -8.8 | <b>H-bond</b><br>Gln643---compound 6a                                                                                                                                                                                                         | 2.65                                                 | -9.2  | <b>H-bond</b><br>Gly159:N---compound 6a<br>Gly162:N---compound 6a<br>Thr195:N---compound 6a<br>Thr195:OG1---compound 6a<br>Thr195:OG1---compound 6a<br>Thr291:OG1---compound 6a<br><b><math>\pi</math>-cation</b><br>Lys179:NZ---compound 6a<br>Lys179:NZ---compound 6a | 2.14<br>2.65<br>1.98<br>3.00<br>2.54<br>2.13<br>4.13<br>4.58 |
| <b>6c</b> | -9.5 | <b>H-bond</b><br>Asn114:ND2---compound 6c<br>Val125:N---compound 6c<br>Cys126:N---compound 6c<br>Ser690:OG---compound 6c<br>Glu78:OE1---compound 6c<br><b><math>\pi</math>-cation</b><br>Arg140:NH1---compound 6c<br>Arg693:NH2---compound 6c | 3.06<br>3.06<br>2.98<br>2.71<br>2.44<br>5.86<br>4.17 | -10.4 | <b>H-bond</b><br>Thr195:OG1---compound 6c<br>Thr195:OG1---compound 6c<br>Thr195:OG1---compound 6c<br>Ala230:N---compound 6c<br>Glu228:O---compound 6c<br><b><math>\pi</math>-cation</b><br>Lys179:NZ---compound 6c                                                      | 2.72<br>2.80<br>2.85<br>2.70<br>2.60<br>4.27                 |
| <b>7a</b> | -9.1 | <b>H-bond</b><br>Tyr836:OH---compound 7a<br>Val851:N---compound 7a<br>Asn853:N---compound 7a<br>Ser854:N---compound 7a<br>Ser854:OG---compound 7a<br>Ser854:OG---compound 7a                                                                  | 2.75<br>3.08<br>3.03<br>2.78<br>3.03<br>3.06         | -9.3  | <b>H-bond</b><br>Lys179:NZ---compound 7a<br>Gly294:N---compound 7a<br>Glu198:OE1---compound 7a<br><b><math>\pi</math>-cation</b><br>Lys179:NZ---compound 7a                                                                                                             | 2.35<br>2.40<br>2.19<br>4.10                                 |



|           |       |                                                                                                                                                                                                                                                   |                                                      |       |                                                                                                                                                                                                                                                                                                   |                                                                      |
|-----------|-------|---------------------------------------------------------------------------------------------------------------------------------------------------------------------------------------------------------------------------------------------------|------------------------------------------------------|-------|---------------------------------------------------------------------------------------------------------------------------------------------------------------------------------------------------------------------------------------------------------------------------------------------------|----------------------------------------------------------------------|
|           |       | Asp810:OD2---compound 7a                                                                                                                                                                                                                          | 2.45                                                 |       |                                                                                                                                                                                                                                                                                                   |                                                                      |
| <b>7b</b> | -9.4  | <b>H-bond</b><br>Asn796:ND2---compound 7b<br>Asn853:ND2---compound 7b<br>Ser854:OG---compound 7b<br>Ser854:OG---compound 7b<br>Asn796:OD1---compound 7b<br>Glu798:OE2---compound 7b<br><b><math>\pi</math>-cation</b><br>Arg852:NH2---compound 7b | 3.00<br>2.98<br>3.00<br>2.90<br>2.85<br>2.36<br>5.68 | -10.4 | <b>H-bond</b><br>Lys179:NZ---compound 7b<br>Thr291:OG1---compound 7b<br>Asp292:OD2---compound 7b<br><b><math>\pi</math>-cation</b><br>Lys179:NZ---compound 7b                                                                                                                                     | 2.45<br>2.14<br>2.98<br>4.33                                         |
| <b>7c</b> | -10.1 | <b>H-bond</b><br>Gln661:O---compound 7c<br>Arg662:N---compound 7c<br>Arg818:NE---compound 7c                                                                                                                                                      | 2.12<br>2.95<br>2.93                                 | -10.5 | <b>H-bond</b><br>Lys179:NZ---compound 7c<br>Thr195:N---compound 7c<br>Thr195:OG1---compound 7c<br>Thr195:OG1---compound 7c<br>Asp292:N---compound 7c<br>Asp292:OD1---compound 7c<br>Phe293:N---compound 7c<br>Gly294:N---compound 7c<br><b><math>\pi</math>-cation</b><br>Lys179:NZ---compound 7c | 2.33<br>2.47<br>2.63<br>2.47<br>2.79<br>2.88<br>2.98<br>2.97<br>4.15 |
| <b>8a</b> | -9.5  | <b>H-bond</b><br>Asn170:ND2---compound 8a<br>Met811:O---compound 8a<br>Cys838:O---compound 8a<br><b><math>\pi</math>-cation</b><br>Arg818:NH2---compound 8a<br>Arg662:NH2---compound 8a<br><b><math>\pi</math>-sigma</b>                          | 2.98<br>3.00<br>2.38<br>5.44<br>5.76                 | -9.5  | <b>H-bond</b><br>Glu191:OE1---compound 8a                                                                                                                                                                                                                                                         | 2.11                                                                 |

|           |      |                                                                                                                                                                                                                                                                                                            |                                                              |       |                                                                                                                                                                                              |                                      |
|-----------|------|------------------------------------------------------------------------------------------------------------------------------------------------------------------------------------------------------------------------------------------------------------------------------------------------------------|--------------------------------------------------------------|-------|----------------------------------------------------------------------------------------------------------------------------------------------------------------------------------------------|--------------------------------------|
|           |      | Pro168:CD---compound 8a                                                                                                                                                                                                                                                                                    | 3.89                                                         |       |                                                                                                                                                                                              |                                      |
| <b>8b</b> | -9.2 | <b>H-bond</b><br>Asn853:ND2---compound 8b<br>Ser854:OG---compound 8b<br>Ser854:OG---compound 8b<br>Ser854:OG---compound 8b<br>Ser854:O---compound 8b<br><b><math>\pi</math>-cation</b><br>Arg852:NH1---compound 8b<br>Arg852:NH2---compound 8b<br><b><math>\pi</math>-sigma</b><br>Met922:CE---compound 8b | 3.02<br>2.99<br>2.86<br>3.07<br>2.98<br>5.88<br>5.36<br>3.50 | -10.3 | <b>H-bond</b><br>Lys179:NZ---compound 8b<br><b><math>\pi</math>-cation</b><br>Lys179:NZ---compound 8b                                                                                        | 2.14<br>4.10                         |
| <b>8c</b> | -9.6 | <b>H-bond</b><br>Cys838:N---compound 8c<br>His670:NE2---compound 8c<br><b><math>\pi</math>-<math>\pi</math></b><br>Phe666---compound 8c<br><b><math>\pi</math>-cation</b><br>Arg818:NH1---compound 8c<br>Arg818:NH2---compound 8c                                                                          | 2.89<br>2.81<br>4.08<br>5.43<br>4.99                         | -10.1 | <b>H-bond</b><br>Thr195:OG1---compound 8c<br>Leu295:N---compound 8c<br>Thr195:OG1---compound 8c<br>Glu198:OE1---compound 8c<br><b><math>\pi</math>-cation</b><br>Lys179:NZ---compound 8c     | 2.45<br>2.35<br>2.10<br>2.18<br>4.05 |
| <b>9a</b> | -8.8 | <b>H-bond</b><br>Met811:O---compound 9a<br>Met811:O---compound 9a<br>Cys838:O---compound 9a<br><b><math>\pi</math>-cation</b><br>Arg818:NH1---compound 9a<br>Arg818:NH2---compound 9a<br>Arg818:NH2---compound 9a<br><b><math>\pi</math>-sigma</b>                                                         | 2.95<br>2.49<br>2.98<br>4.71<br>4.08<br>5.35                 | -9.2  | <b>H-bond</b><br>Glu228:O---compound 9a<br>Glu228:O---compound 9a<br><b><math>\pi</math>-cation</b><br>Lys179:NZ---compound 9a<br><b><math>\pi</math>-sigma</b><br>Thr291:CG2 ---compound 9a | 1.97<br>2.43<br>3.50<br>3.92         |

|           |      |                                                                                                 |                      |      |                                                                  |              |
|-----------|------|-------------------------------------------------------------------------------------------------|----------------------|------|------------------------------------------------------------------|--------------|
|           |      | Arg662:CG---compound 9a                                                                         | 3.97                 |      |                                                                  |              |
| <b>9b</b> | -8.7 | <b>H-bond</b><br>Tyr836:OH---compound 9b<br>Asp933:N---compound 9b                              | 2.83<br>2.99         | -9.6 | <b><math>\pi</math>-cation</b><br>Lys179:NZ---compound 9b        | 3.95         |
|           |      | <b><math>\pi</math>-cation</b><br>Lys802:NZ---compound 9b                                       | 4.85                 |      |                                                                  |              |
| <b>9c</b> | -9.2 | <b>H-bond</b><br>Asn170:ND2---compound 9c<br>Cys838:N---compound 9c<br>His670:NE2---compound 9c | 2.88<br>2.89<br>2.95 | -9.5 | <b>H-bond</b><br>Lys179:NZ---compound 9c<br>Glu234---compound 9c | 2.31<br>2.54 |
|           |      | <b><math>\pi</math>-<math>\pi</math></b><br>Phe666---compound 9c                                | 4.24                 |      | <b><math>\pi</math>-cation</b><br>Lys179:NZ---compound 9c        | 3.97         |

**Table S1.**

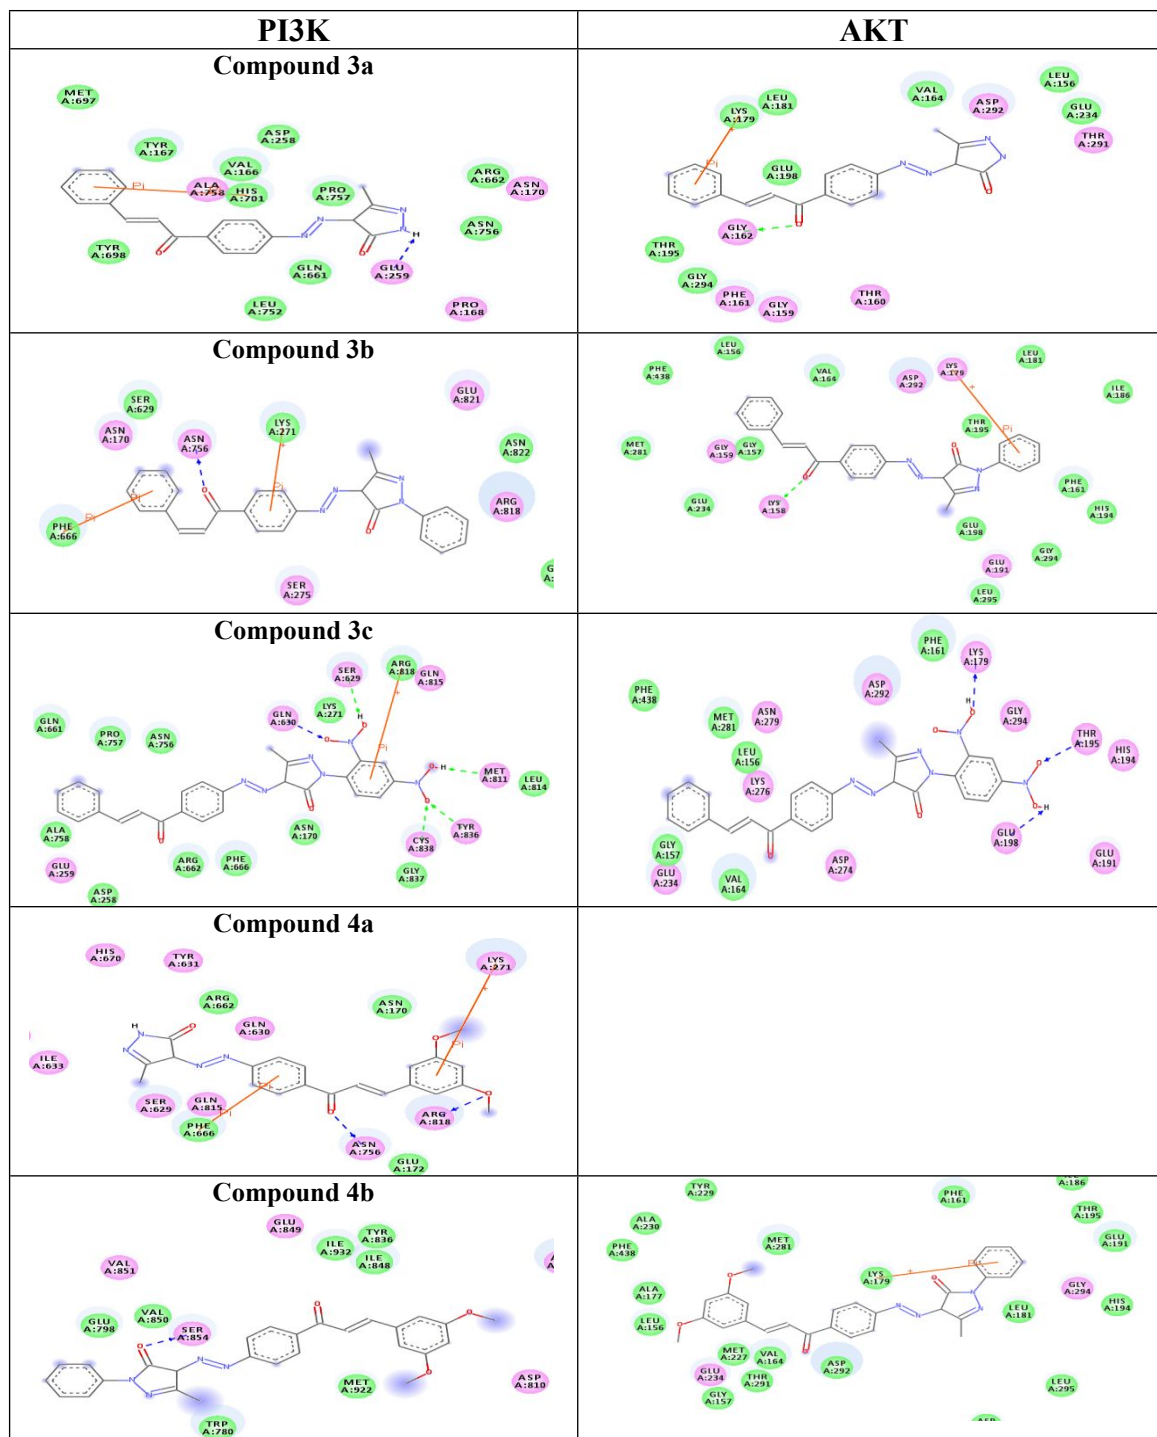

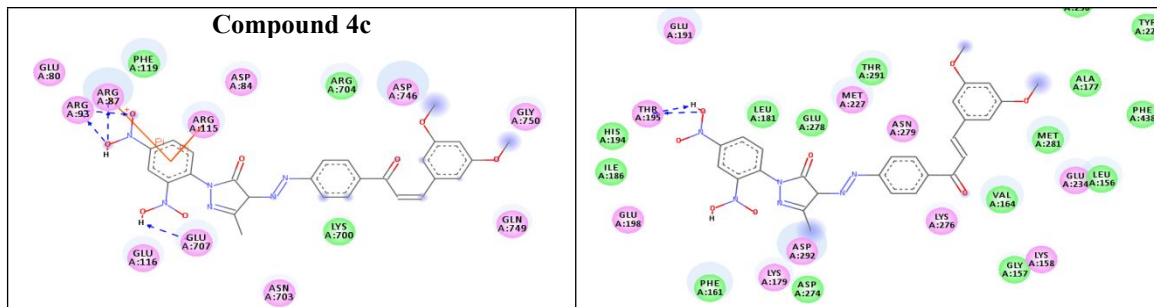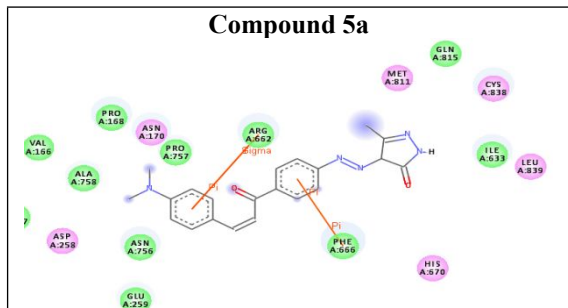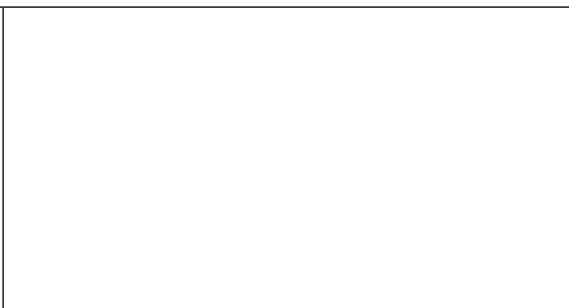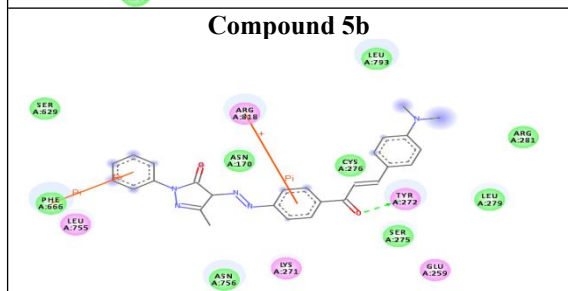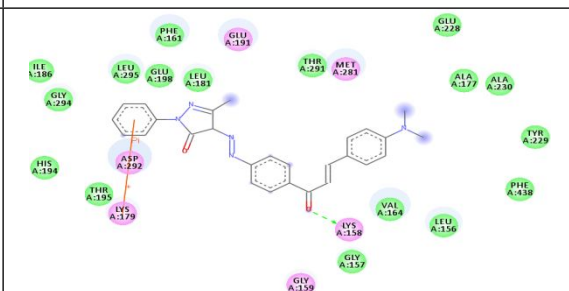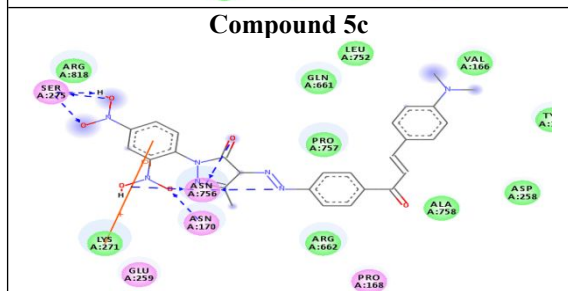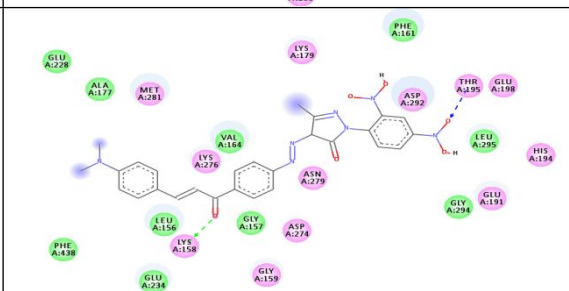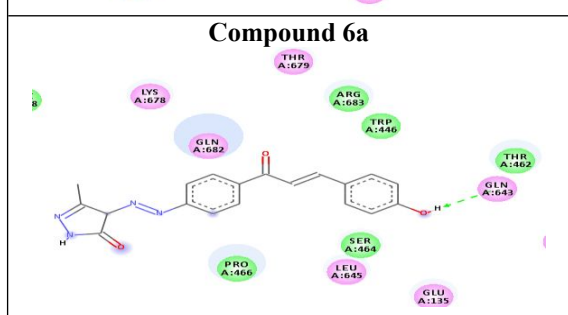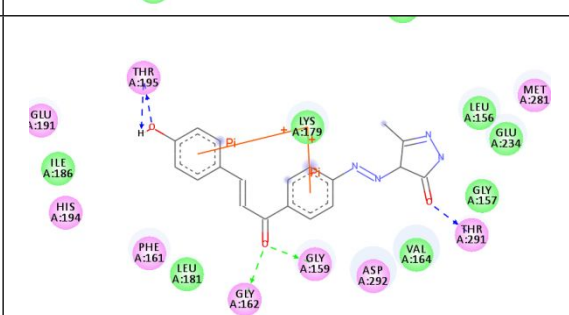





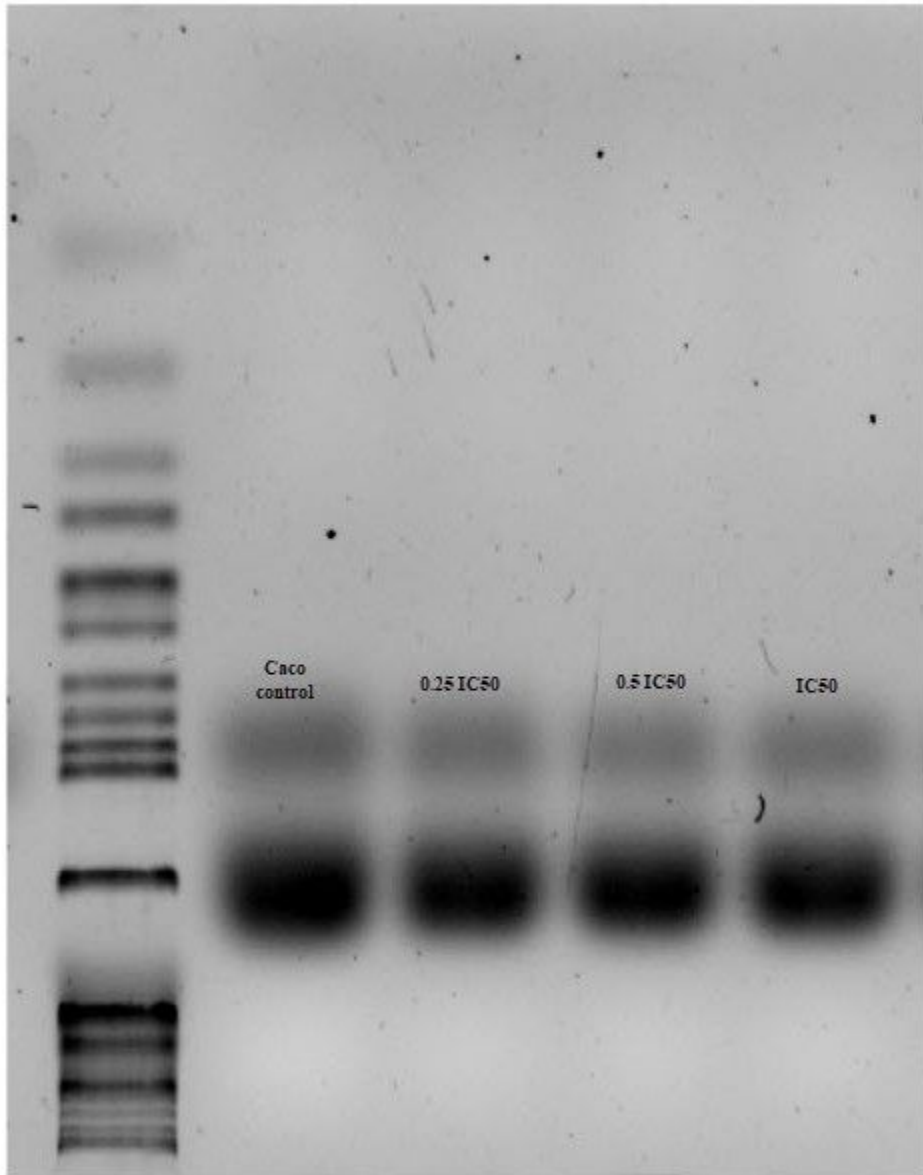

$\beta$ -actin western blot raw data



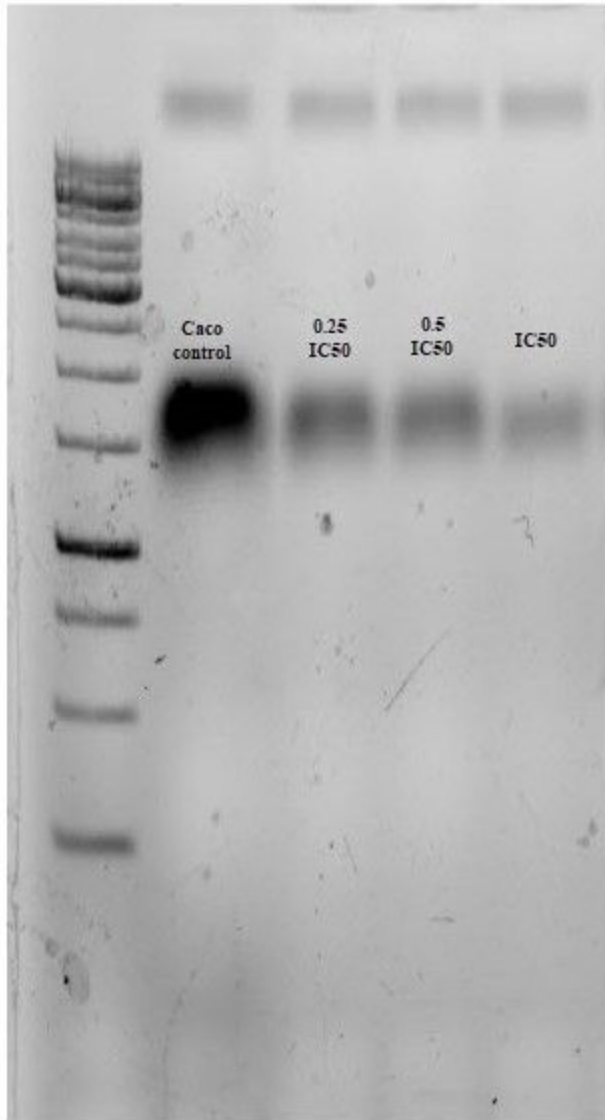

p-Akt western blot raw data

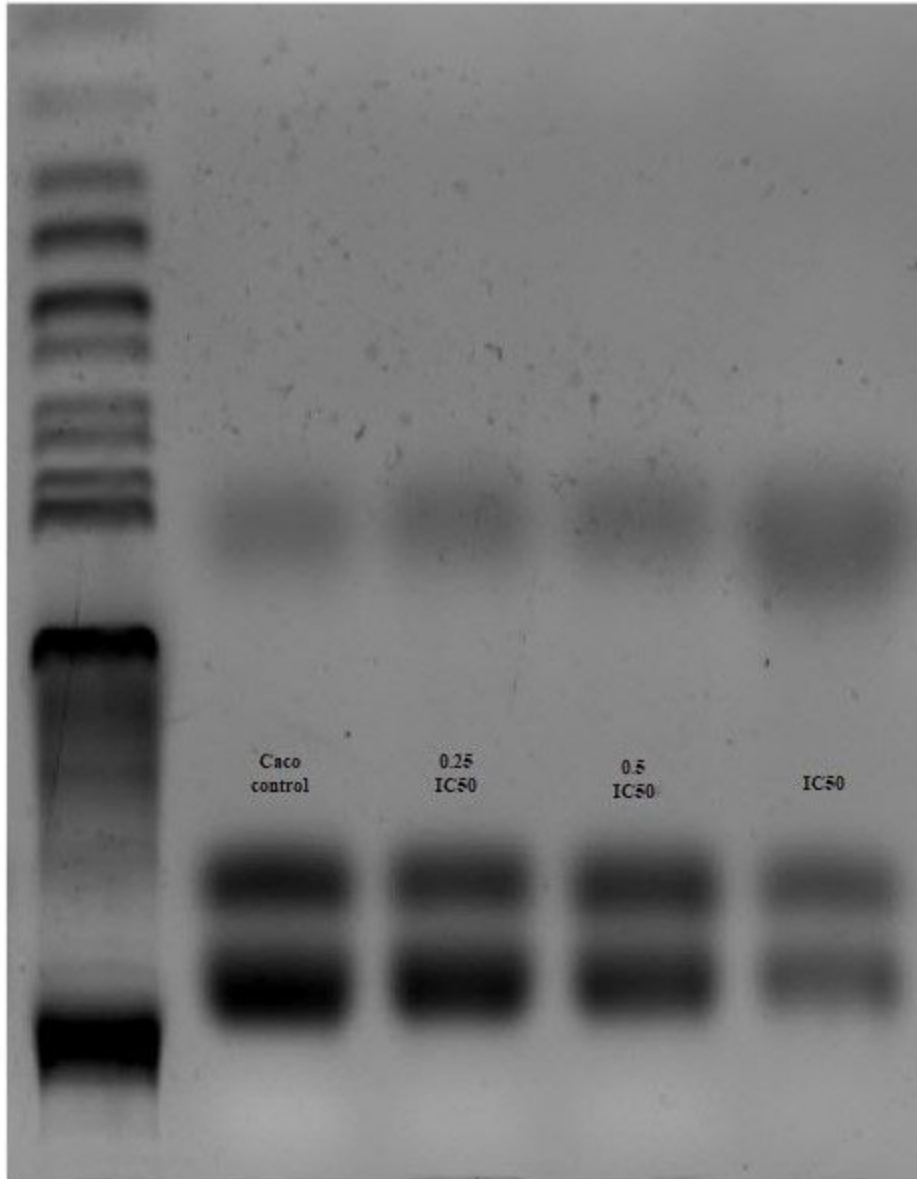

p-ERK1/2 western blot raw data

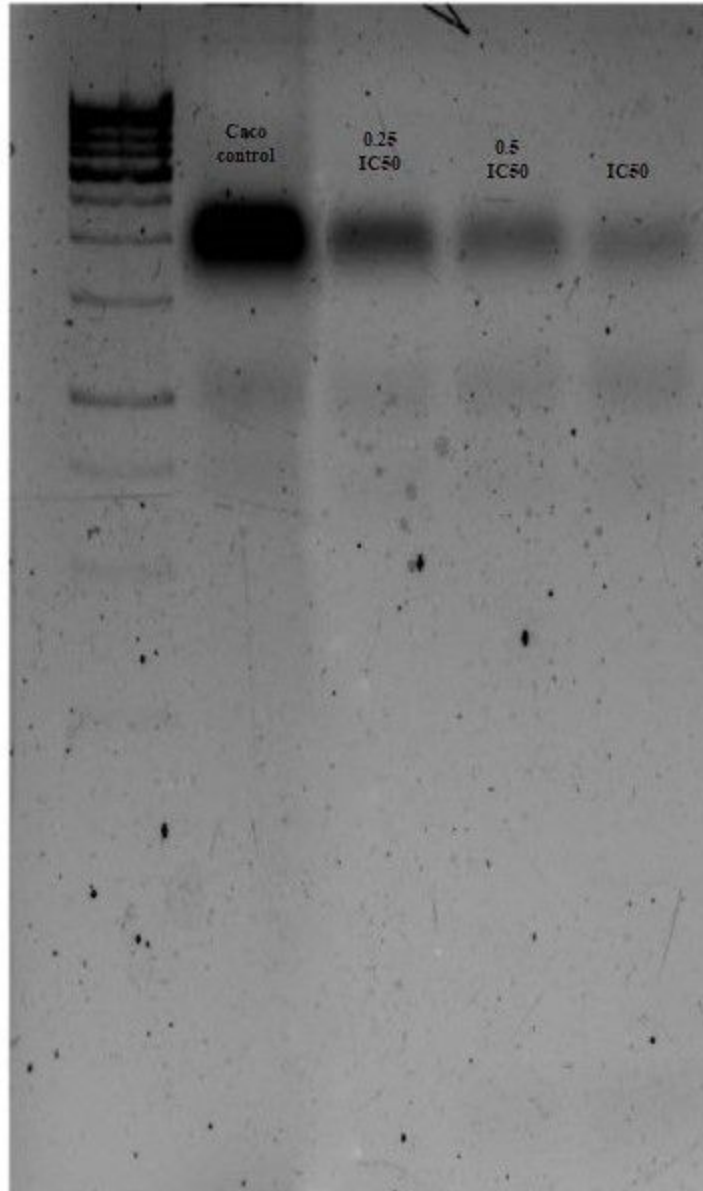

p-PI3K western blot raw data
